# Supplementary material for: Design of nanoscaled materials based on tetraoxa[8]circulene
Source: Royal Society of Chemistry journal article supplement (doi:10.1039/c3cp55154g), 2014-01-01
Supplement: c3cp55154g.pdf [file c3cp55154g.pdf]

# Design of nanoscaled materials based on tetraoxa[8]circulene

Gleb V. Baryshnikov,<sup>\*a</sup> Boris F. Minaev,<sup>a</sup> Natalia N. Karaush<sup>a</sup> and

Valentina A. Minaeva

<sup>a</sup> Bohdan Khmelnytsky National University, Cherkassy, 18031, Ukraine. E-mail:

[glebchem@rambler.ru](mailto:glebchem@rambler.ru), [bfmin@rambler.ru](mailto:bfmin@rambler.ru)

<sup>b</sup> Department of Chemistry, University of Copenhagen, 2100 Copenhagen Ø,

Denmark, E-mail: [pittel@kiku.dk](mailto:pittel@kiku.dk)

## Electronic Supplementary Information

### List of Content

|           |                                                                                                           |           |
|-----------|-----------------------------------------------------------------------------------------------------------|-----------|
| <b>1</b>  | Figure S1. MOs diagram for compound <b>1</b>                                                              | <b>2</b>  |
| <b>2</b>  | Figure S2. MOs diagram for compound <b>2</b>                                                              | <b>3</b>  |
| <b>3</b>  | Figure S3. MOs diagram for compound <b>3</b>                                                              | <b>4</b>  |
| <b>4</b>  | Figure S4. MOs diagram for compound <b>4</b>                                                              | <b>5</b>  |
| <b>5</b>  | Figure S5. MOs diagram for compound <b>5</b>                                                              | <b>6</b>  |
| <b>6</b>  | Figure S6. IR spectra for compounds <b>4B</b> and <b>1</b>                                                | <b>7</b>  |
| <b>7</b>  | NICS(0) and NICS(1) calculations for compound <b>1</b>                                                    | <b>8</b>  |
| <b>7</b>  | Table S1. $S_0 \rightarrow S_1$ and $S_0 \rightarrow T_1$ electronic transitions for compounds <b>1–5</b> | <b>9</b>  |
| <b>8</b>  | Table S2. Selected MOs for compound <b>3</b>                                                              | <b>12</b> |
| <b>9</b>  | Table S3. Total energy for compounds <b>1–5</b>                                                           | <b>14</b> |
| <b>10</b> | Optimized Cartesian coordinates of compounds <b>1–5</b> (Tables S4–S8)                                    | <b>15</b> |

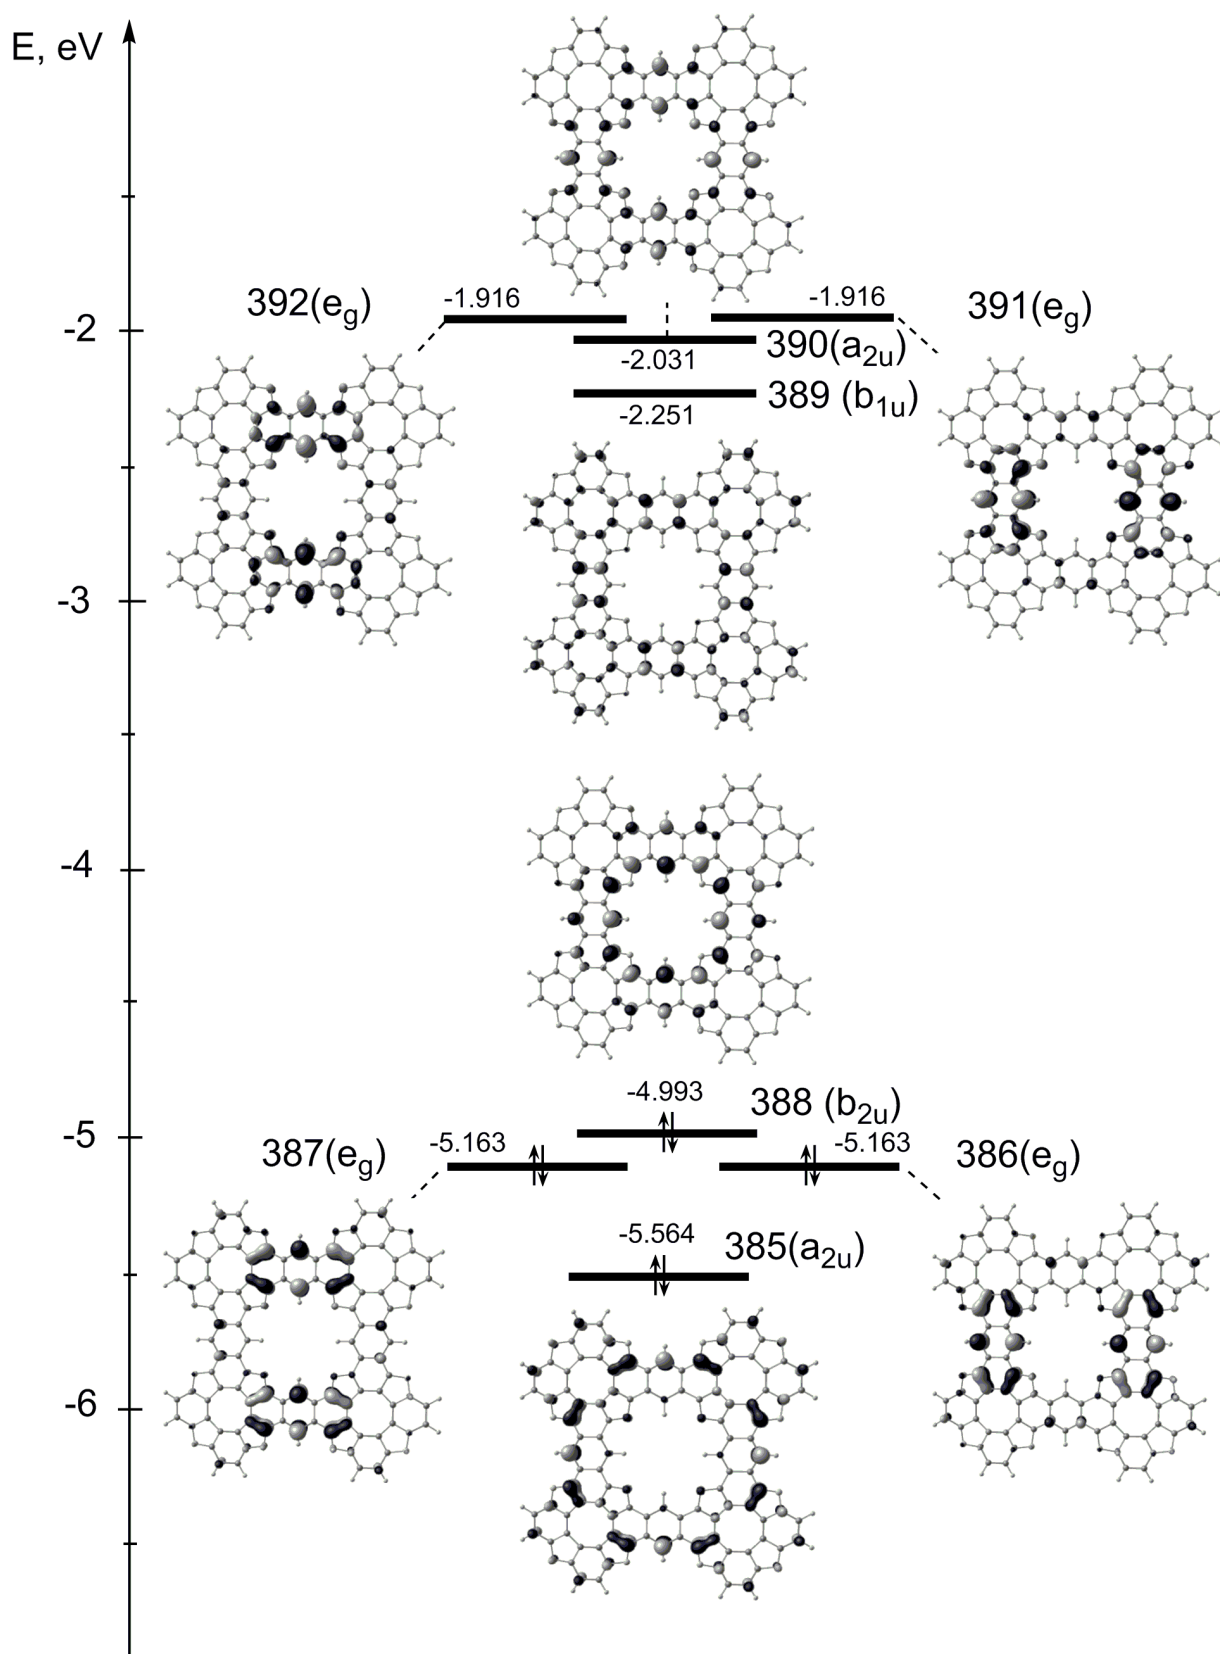

**Figure S1.** Molecular orbitals diagram of the compound 1 calculated at the B3LYP/6-21G(d) level of theory

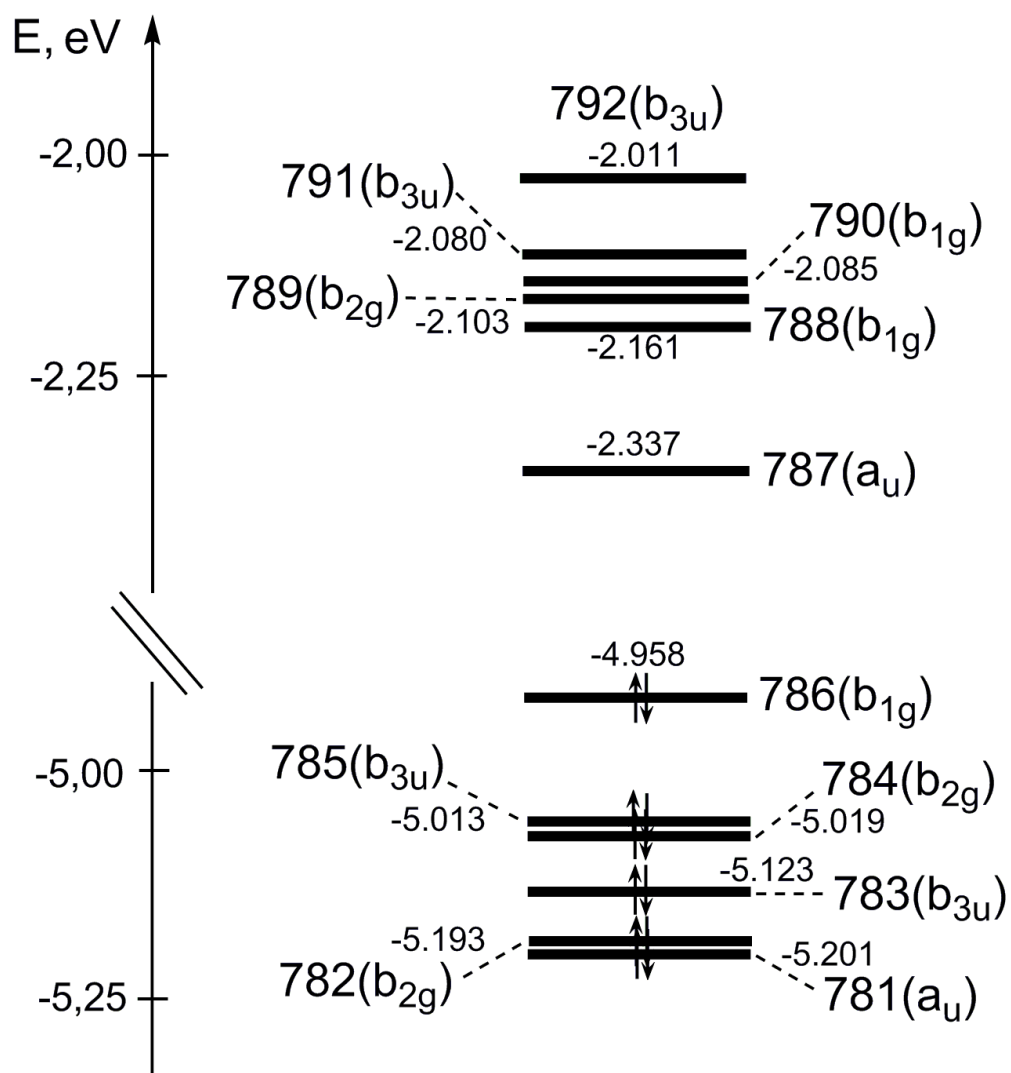

**Figure S2.** Molecular orbitals diagram of the compound **2** calculated at the B3LYP/6-21G(d) level of theory

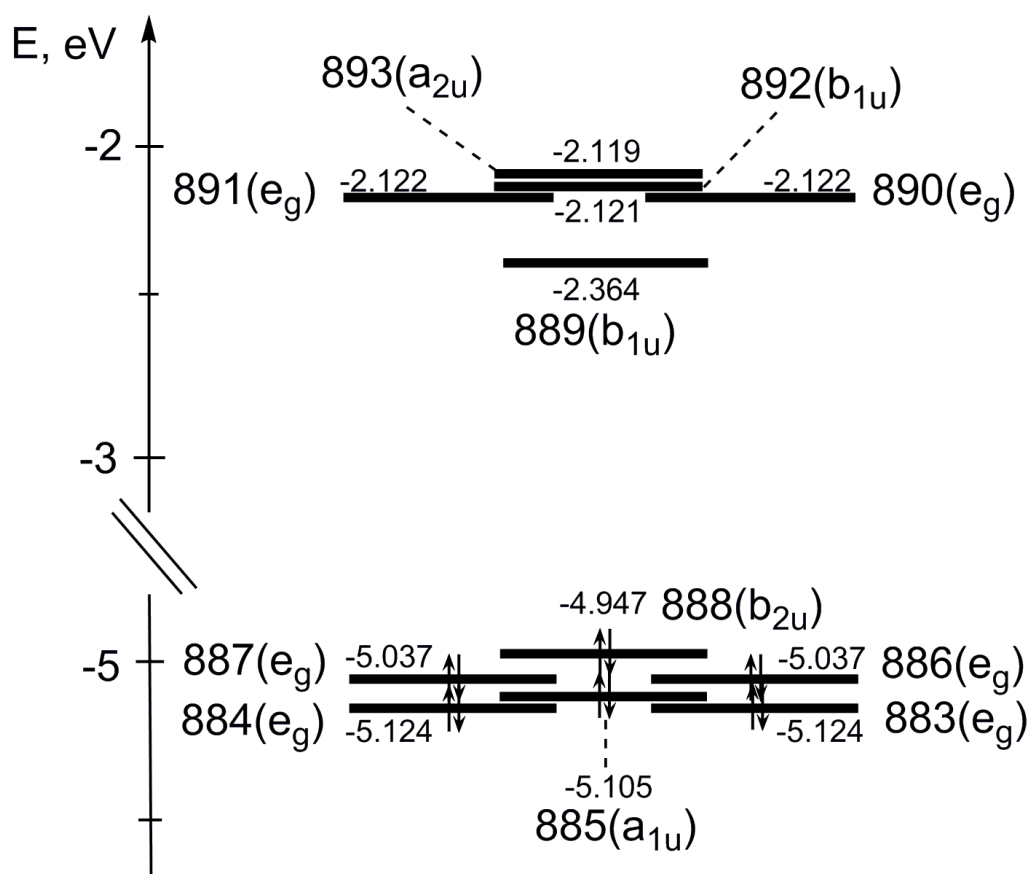

**Figure S3.** Molecular orbitals diagram of the compound **3** calculated at the B3LYP/6-21G(d) level of theory

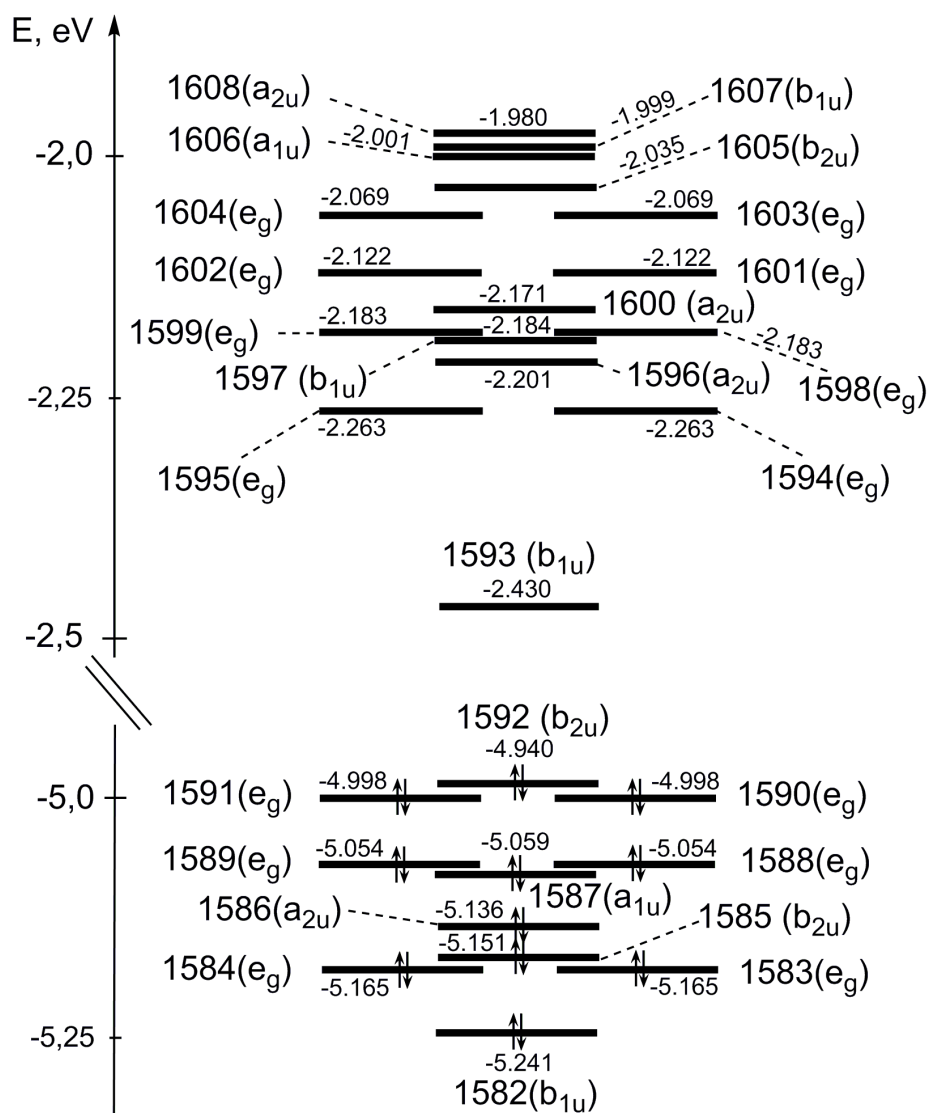

**Figure S4.** Molecular orbitals diagram of the compound **4** calculated at the B3LYP/6-21G(d) level of theory

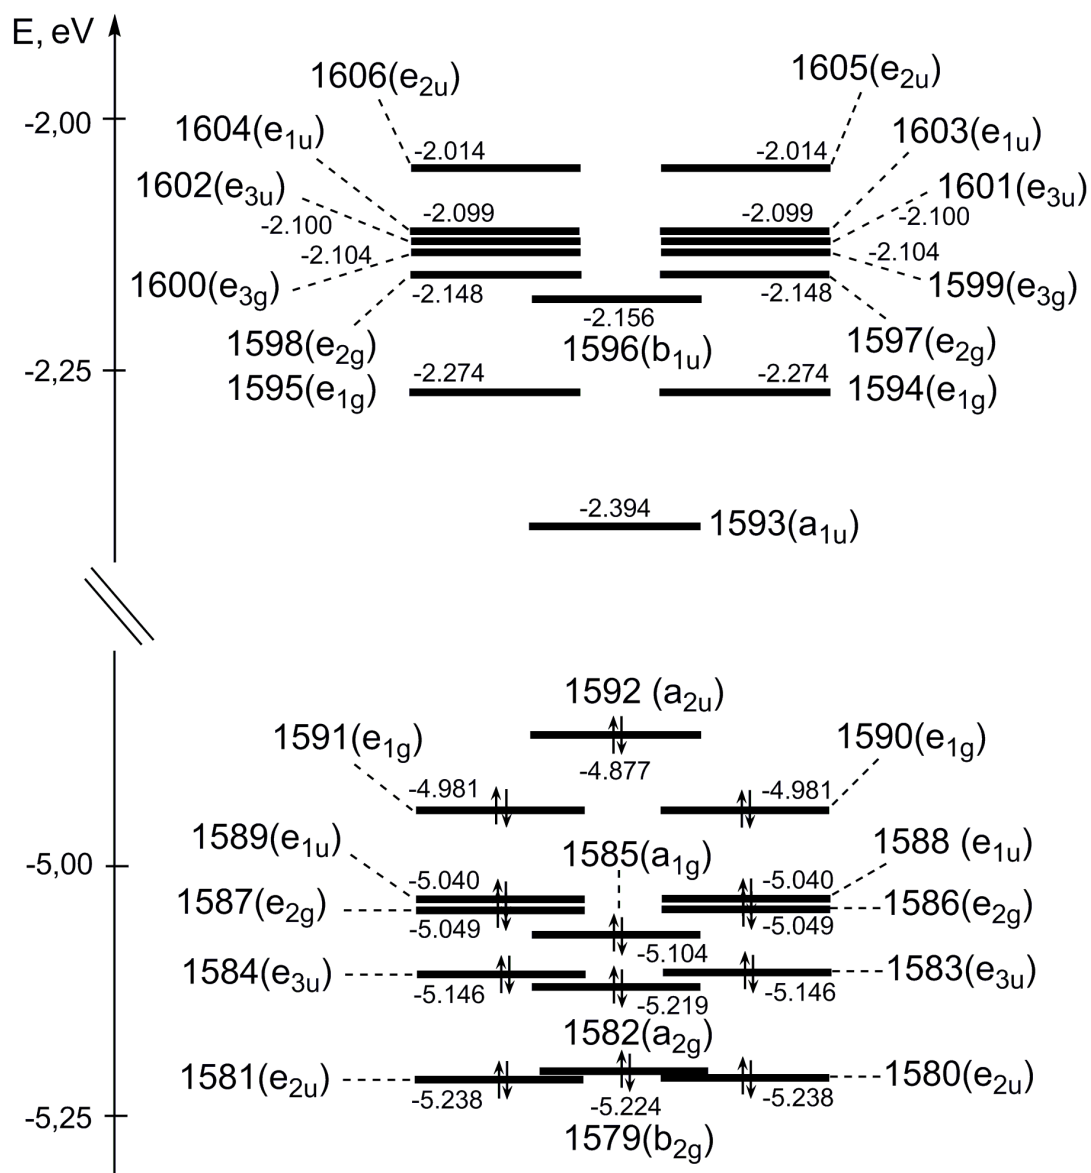

**Figure S5.** Molecular orbitals diagram of the compound **5** calculated at the B3LYP/6-21G(d) level of theory

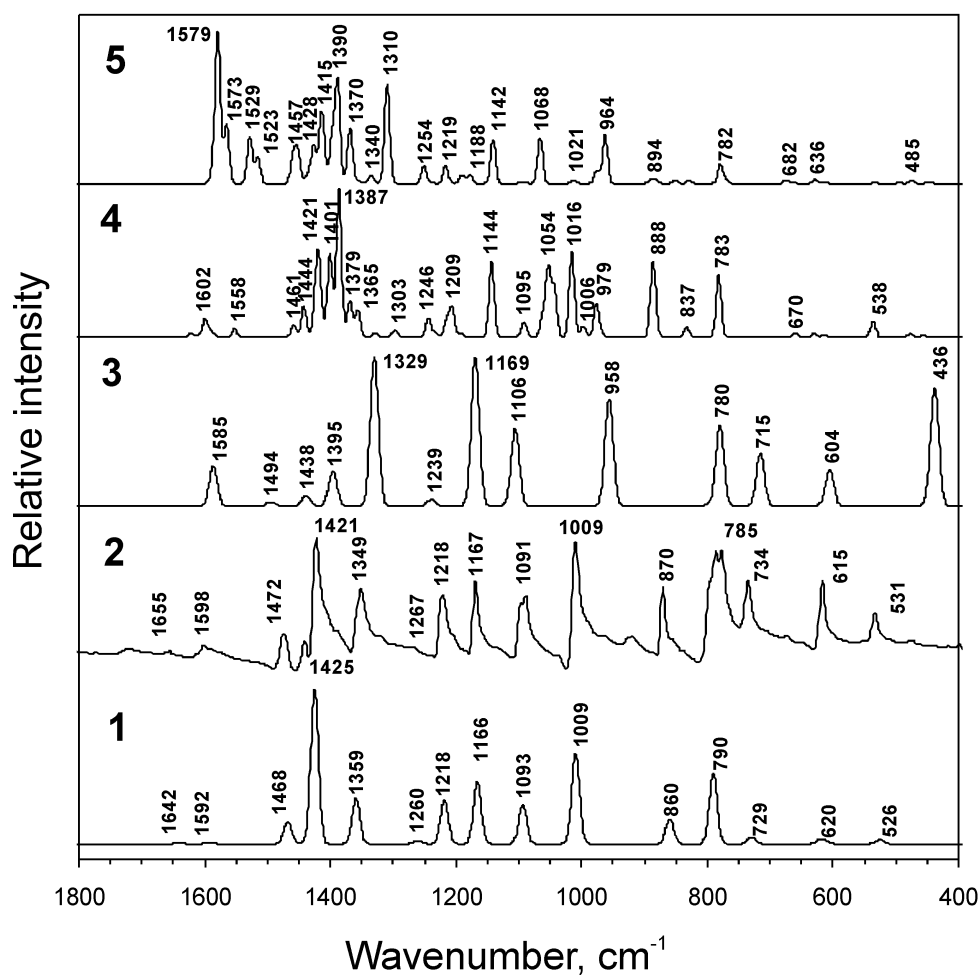

**Figure S6.** The FTIR spectra for compounds **4B** and **1** Calculated by the B3LYP/6-21G(d) method in the ground singlet (S<sub>0</sub>) and excited triplet (T<sub>1</sub>) electronic states: 1 – **4B** (S<sub>0</sub>); 2 – experimental spectrum for **4B**; 3 – **4B** (T<sub>1</sub>); 4 – compound **1** (S<sub>0</sub>); 5 – compound **1** (T<sub>1</sub>).

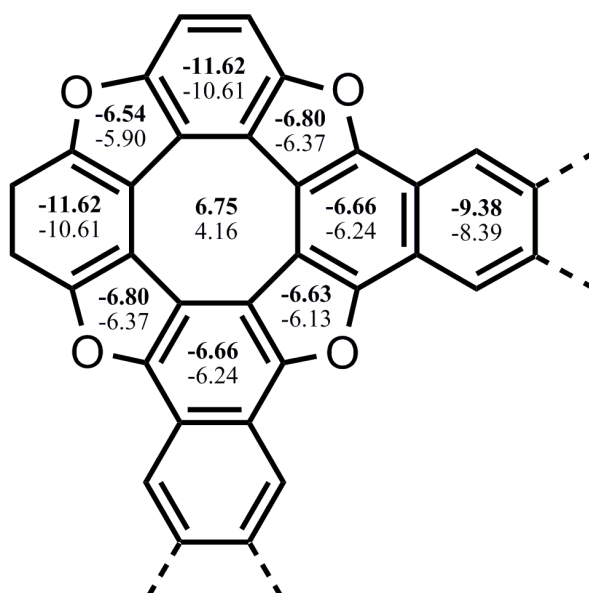

**Figure S7.** The NICS(0) (top) and NICS (1) (bottom) indexes for the compound **1** calculated at the GIAO B3LYP/6-311++G(d,p) level of theory.



**Table S1.** Calculated parameters and assignment of the vertical electronic transitions in the electronic absorption spectrum of the compounds **1–5** at the B3LYP/3–21G Level

| State              | Transition                                                     | $\lambda$ , nm | $M_{xy}$ , a.u. | $\mu_z, \beta$ | $f$   | Assignment<br>(in vacuum approximation)                                                                                                              |
|--------------------|----------------------------------------------------------------|----------------|-----------------|----------------|-------|------------------------------------------------------------------------------------------------------------------------------------------------------|
| <b>Compound 1</b>  |                                                                |                |                 |                |       |                                                                                                                                                      |
| T <sub>1</sub>     | X <sup>1</sup> A <sub>1g</sub> →1 <sup>3</sup> B <sub>1g</sub> | 641            | 0               | 0              | 0.000 | 0.44(388→390) + 0.30[(386→391) – (387→392)] – 0.18(385→395) + 0.15(384→389)                                                                          |
| T <sub>2(3)</sub>  | X <sup>1</sup> A <sub>1g</sub> →1 <sup>3</sup> E <sub>u</sub>  | 605            | 0               | 0              | 0.000 | 0.33(388→392) – 0.28(387→390) – 0.26(388→391) – 0.22(386→390) + 0.18(387→395) – 0.14(386→395) + 0.13(385→392) – 0.12(386→389) + 0.10(385→391)        |
| T <sub>4</sub>     | X <sup>1</sup> A <sub>1g</sub> →1 <sup>3</sup> A <sub>2g</sub> | 545            | 0               | 0              | 0.000 | 0.63(388→389) + 0.14[(387→391) – (386→392)] + 0.11[(386→393) – (387→394)]                                                                            |
| S <sub>1</sub>     | X <sup>1</sup> A <sub>1g</sub> →1 <sup>1</sup> A <sub>2g</sub> | 508            | 0               | 8.30           | 0.000 | 0.68(388→389)                                                                                                                                        |
| S <sub>2(3)</sub>  | X <sup>1</sup> A <sub>1g</sub> →1 <sup>1</sup> E <sub>u</sub>  | 454            | 3.23            | 0              | 0.700 | 0.63(386, 387→389) – 0.15[(386→389) + (387→389)] – 0.13[(386,387→390) + (388→392) – (388→391)] + 0.10[(384→391) – (384→392)]                         |
| S <sub>4</sub>     | X <sup>1</sup> A <sub>1g</sub> →1 <sup>1</sup> B <sub>1g</sub> | 448            | 0               | 0              | 0.000 | 0.69(388→390) + 0.12 (384→389)                                                                                                                       |
| S <sub>5(6)</sub>  | X <sup>1</sup> A <sub>1g</sub> →2 <sup>1</sup> E <sub>u</sub>  | 431            | 0.34            | 0              | 0.008 | 0.62(388→391,392) + 0.25[(386→390) – (387→390)] + 0.20[(387→389) – (386→389)]                                                                        |
| S <sub>7</sub>     | X <sup>1</sup> A <sub>1g</sub> →1 <sup>1</sup> B <sub>2g</sub> | 430            | 0               | 0              | 0.000 | 0.46[(386→392) + (387→391)] + 0.21(385→389)                                                                                                          |
| S <sub>8(9)</sub>  | X <sup>1</sup> A <sub>1g</sub> →3 <sup>1</sup> E <sub>u</sub>  | 423            | 1.89            | 0              | 0.136 | 0.55(386,387→390) + 0.25[(388→392, 394) – (388→391, 393)] + 0.19[(386→390) – (387→390)]                                                              |
| S <sub>10</sub>    | X <sup>1</sup> A <sub>1g</sub> →2 <sup>1</sup> A <sub>2g</sub> | 420            | 0               | 7.30           | 0.000 | 0.48[(386→392) – (387→391)] – 0.11[(388→389) + (384→390)]                                                                                            |
| <b>Compound 3</b>  |                                                                |                |                 |                |       |                                                                                                                                                      |
| T <sub>1</sub>     | X <sup>1</sup> A <sub>1g</sub> →1 <sup>3</sup> A <sub>2g</sub> | 663            | 0               | 0              | 0.000 | 0.25(885→893) + 0.24(888→892) + 0.18[(887→894) – (886→895)] – 0.16[(884→896) – (883→897)]                                                            |
| T <sub>2(3)</sub>  | X <sup>1</sup> A <sub>1g</sub> →1 <sup>3</sup> E <sub>u</sub>  | 638            | 0               | 0              | 0.000 | –0.22[(888→896) – (887→892)] – 0.18(883→893) – 0.16[(888→894) + (887→898) + (885→897)] + 0.15(884→892)                                               |
| T <sub>4</sub>     | X <sup>1</sup> A <sub>1g</sub> →1 <sup>3</sup> A <sub>2g</sub> | 613            | 0               | 0              | 0.000 | –0.26(888→892) + 0.19(884→894) – 0.18(883→895) + 0.16[(888→889) + (885→893)] – 0.15[(885→900) – (887→896)] – 0.14[(886→890) + (887→891) – (886→897)] |
| S <sub>1</sub>     | X <sup>1</sup> A <sub>1g</sub> →1 <sup>1</sup> A <sub>2g</sub> | 518            | 0               | 18.79          | 0.000 | 0.64(888→889) + 0.14[(887→891) – (886→890)]                                                                                                          |
| S <sub>2</sub>     | X <sup>1</sup> A <sub>1g</sub> →1 <sup>1</sup> B <sub>1g</sub> | 495            | 0               | 0              | 0.000 | 0.59(885→889) – 0.17[(884→890) + (883→891) + (888→893)]                                                                                              |
| S <sub>3(4)</sub>  | X <sup>1</sup> A <sub>1g</sub> →1 <sup>1</sup> E <sub>u</sub>  | 491            | 0.33            | 0              | 0.007 | 0.57(883,884→889) – 0.19(888→894,895) + 0.18[(885→891) + (888→890) – (885→890, 891)] + 0.11[(883→889) – (884→889)]                                   |
| S <sub>5(6)</sub>  | X <sup>1</sup> A <sub>1g</sub> →2 <sup>1</sup> E <sub>u</sub>  | 484            | 5.60            | 0              | 1.965 | 0.51(886, 887→889) + 0.42[(886→889) – (887→889)]                                                                                                     |
| S <sub>7</sub>     | X <sup>1</sup> A <sub>1g</sub> →2 <sup>1</sup> B <sub>1g</sub> | 466            | 0               | 0              | 0.000 | 0.53(888→893) – 0.26(885→889) + 0.18[(886→895) – (887→894)]                                                                                          |
| S <sub>8</sub>     | X <sup>1</sup> A <sub>1g</sub> →1 <sup>1</sup> A <sub>1g</sub> | 462            | 0               | 0              | 0.000 | 0.35[(886→891) + (887→890)] + 0.24[(886→895) + (887→894)] + 0.16[(883→891) + (884→890)]                                                              |
| S <sub>9(10)</sub> | X <sup>1</sup> A <sub>1g</sub> →3 <sup>1</sup> E <sub>u</sub>  | 462            | 1.43            | 0              | 0.135 | 0.36(888→894,895) + 0.34(888→890, 891) +                                                                                                             |

|                   |                                                                |     |      |       |       |                                                                                                                                                                                     |
|-------------------|----------------------------------------------------------------|-----|------|-------|-------|-------------------------------------------------------------------------------------------------------------------------------------------------------------------------------------|
|                   |                                                                |     |      |       |       | + 0.27 (886,887→893) – 0.21[(888→895) + (888→894)] – 0.20[(888→891) + (888→890)] – 0.16(886, 887→893)                                                                               |
| <b>Compound 4</b> |                                                                |     |      |       |       |                                                                                                                                                                                     |
| T <sub>1(2)</sub> | X <sup>1</sup> A <sub>1g</sub> →1 <sup>3</sup> E <sub>u</sub>  | 655 | 0    | 0     | 0.000 | 0.13[(1592→1602) – (1592→1601)] – 0.12(1587→1603,1604) + 0.11(1590,1591→1600) – 0.10(1592→1601,1602)                                                                                |
| T <sub>3</sub>    | X <sup>1</sup> A <sub>1g</sub> →1 <sup>3</sup> A <sub>2g</sub> | 640 | 0    | 0     | 0.000 | – 0.19(1587→1608) + 0.16(1585→1599) – 0.15(1592→1607) – 0.14(1582→1605) + 0.13[(1588→1604) – (1589→1603) + (1583→1603) – (1584→1604)] – 0.12(1586→1606)                             |
| S <sub>1</sub>    | X <sup>1</sup> A <sub>1g</sub> →1 <sup>1</sup> A <sub>2g</sub> | 522 | 0    | 32.49 | 0.000 | 0.59(1592→1593) + 0.21[(1590→1594) + (1591→1595)]                                                                                                                                   |
| S <sub>2(3)</sub> | X <sup>1</sup> A <sub>1g</sub> →1 <sup>1</sup> E <sub>u</sub>  | 504 | 1.57 | 0     | 0.149 | 0.46(1588,1589→1593) – 0.25[(1592→1594) + (1592→1595)] + 0.23[(1588→1593) – (1589→1593)] + 0.16[(1587→1594) – (1587→1595)] + 0.13(1592→1594,1595) + 0.10[(1591→1593) – (1590→1593)] |
| S <sub>4(5)</sub> | X <sup>1</sup> A <sub>1g</sub> →2 <sup>1</sup> E <sub>u</sub>  | 500 | 6.95 | 0     | 2.311 | 0.53(1590,1591→1593) – 0.26(1592→1594,1595) + 0.21[(1590→1593) – (1591→1593)] + 0.13[(1589→1593) – (1588→1593)] + 0.12[(1587→1594) – (1587→1595)] + 0.10[(1592→1594) – (1592→1595)] |
| S <sub>6</sub>    | X <sup>1</sup> A <sub>1g</sub> →1 <sup>1</sup> B <sub>1g</sub> | 493 | 0    | 0.001 | 0     | 0.49(1586→1593) + 0.23[(1588→1594) – (1589→1595)] – 0.16(1592→1599) + 0.13[(1582→1595) – (1583→1594)] – 0.10(1581→1596)                                                             |
| <b>Compound 2</b> |                                                                |     |      |       |       |                                                                                                                                                                                     |
| T <sub>1</sub>    | X <sup>1</sup> A <sub>1g</sub> →1 <sup>3</sup> B <sub>1u</sub> | 640 | 0    | 0     | 0.000 | – 0.30(784→792) + 0.22(783→789) + 0.21(786→794) – 0.19[(785→793) – (781→790)] – 0.16[(782→791) – (785→789)]                                                                         |
| T <sub>2</sub>    | X <sup>1</sup> A <sub>1g</sub> →1 <sup>3</sup> B <sub>2u</sub> | 618 | 0    | 0     | 0.000 | 0.31(785→790) – 0.28(786→791) – 0.21(786→797) – 0.18(783→798) + 0.16 (780→790) + 0.13(786→792)                                                                                      |
| T <sub>3</sub>    | X <sup>1</sup> A <sub>1g</sub> →1 <sup>3</sup> B <sub>3g</sub> | 611 | 0    | 0     | 0.000 | 0.25[(786→789) + (784→790)] + 0.24(781→792) – 0.21(785→794) + 0.17[(784→798) + (783→794)] – 0.15(786→799)                                                                           |
| S <sub>1</sub>    | X <sup>1</sup> A <sub>1g</sub> →1 <sup>1</sup> B <sub>2u</sub> | 505 | 0.23 | 0     | 0.003 | 0.60(784→787) – 0.25(785→788) + 0.18(783→788) – 0.12(786→791)                                                                                                                       |
| S <sub>2</sub>    | X <sup>1</sup> A <sub>1g</sub> →1 <sup>1</sup> B <sub>3g</sub> | 504 | 0    | 16.00 | 0.000 | 0.61(785→787) – 0.25(784→788) – 0.13(786→795)                                                                                                                                       |
| S <sub>3</sub>    | X <sup>1</sup> A <sub>1g</sub> →1 <sup>1</sup> B <sub>1u</sub> | 498 | 6.99 | 0     | 2.978 | 0.68(786→787) – 0.12(781→788)                                                                                                                                                       |
| S <sub>4</sub>    | X <sup>1</sup> A <sub>1g</sub> →2 <sup>1</sup> B <sub>3g</sub> | 491 | 0    | 1.07  | 0.000 | 0.58(783→787) + 0.29(784→788) + 0.15(786→789)                                                                                                                                       |
| S <sub>5</sub>    | X <sup>1</sup> A <sub>1g</sub> →3 <sup>1</sup> B <sub>3g</sub> | 467 | 0    | 0.80  | 0.000 | 0.60(786→789) – 0.20(786→793) – 0.15(783→787)                                                                                                                                       |
| S <sub>6</sub>    | X <sup>1</sup> A <sub>1g</sub> →2 <sup>1</sup> B <sub>2u</sub> | 465 | 1.54 | 0     | 0.155 | 0.51(786→791) + 0.27(782→787) + 0.22(785→788) + 0.17(784→787)                                                                                                                       |
| S <sub>7</sub>    | X <sup>1</sup> A <sub>1g</sub> →1 <sup>1</sup> A <sub>g</sub>  | 462 | 0    | 0     | 0.000 | 0.53(786→788) – 0.31(781→787) + 0.23(786→790)                                                                                                                                       |
| S <sub>8</sub>    | X <sup>1</sup> A <sub>1g</sub> →2 <sup>1</sup> A <sub>g</sub>  | 457 | 0    | 0     | 0.000 | 0.53(786→790) + 0.21(784→789) – 0.20(785→791) – 0.18(786→788) + 0.17(781→787)                                                                                                       |
| S <sub>9</sub>    | X <sup>1</sup> A <sub>1g</sub> →3 <sup>1</sup> B <sub>2u</sub> | 453 | 3.38 | 0     | 0.764 | 0.45(782→787) – 0.39(786→791) + 0.24(785→788) + 0.13(786→792)                                                                                                                       |
| S <sub>10</sub>   | X <sup>1</sup> A <sub>1g</sub> →2 <sup>1</sup> B <sub>1u</sub> | 452 | 0.01 | 0     | 0.000 | 0.51(785→789) + 0.36(784→791) – 0.15(784→792)                                                                                                                                       |
| <b>Compound 5</b> |                                                                |     |      |       |       |                                                                                                                                                                                     |

|            |                                   |     |     |       |       |                                                                                                                                                                                                                                                                                                                  |
|------------|-----------------------------------|-----|-----|-------|-------|------------------------------------------------------------------------------------------------------------------------------------------------------------------------------------------------------------------------------------------------------------------------------------------------------------------|
| $T_{1(2)}$ | $X^1A_{1g} \rightarrow 1^3E_u$    | 618 | 0   | 0     | 0.000 | $0.19[(1579 \rightarrow 1601) - (1579 \rightarrow 1602)] -$<br>$0.17[(1588, 1589 \rightarrow 1609) - (1583, 1584 \rightarrow 1607)] -$<br>$0.14[(1582 \rightarrow 1603) + 0.14(1582 \rightarrow 1604)] -$<br>$- 0.13[(1583, 1584 \rightarrow 1598) - (1584 \rightarrow 1597)] +$<br>$+ (1583 \rightarrow 1597)]$ |
| $T_3$      | $X^1A_{1g} \rightarrow 1^3A_{2g}$ | 610 | 0   | 0     | 0.000 | $0.21(1592 \rightarrow 1593) - 0.20(1579 \rightarrow 1607) +$<br>$0.19[(1587 \rightarrow 1598) - (1586 \rightarrow 1597)] +$<br>$+ 0.18[(1583 \rightarrow 1601) - (1584 \rightarrow 1602)] -$<br>$- 0.16[(1588 \rightarrow 1603) + (1589 \rightarrow 1604) - (1582 \rightarrow 1609)]$                           |
| $S_1$      | $X^1A_{1g} \rightarrow 1^1A_{2g}$ | 530 | 0   | 28.92 | 0.000 | $0.60(1592 \rightarrow 1593) - 0.23[(1590 \rightarrow 1594) +$<br>$+ (1591 \rightarrow 1595)]$                                                                                                                                                                                                                   |
| $S_2$      | $X^1A_{1g} \rightarrow 1^1E_{2u}$ | 502 | 0   | 0     | 0.000 | $0.50(1586 \rightarrow 1593) - 0.22[(1588 \rightarrow 1595) +$<br>$+ (1589 \rightarrow 1594)] - 0.18(1592 \rightarrow 1597) +$<br>$0.16[(1583 \rightarrow 1595) + (1584 \rightarrow 1594)]$                                                                                                                      |
| $S_{3(4)}$ | $X^1A_{1g} \rightarrow 1^1E_u$    | 499 | 6.7 | 0     | 2.747 | $0.38(1590, 1591 \rightarrow 1593) - 0.34[(1590 \rightarrow 1593) +$<br>$+ (1591 \rightarrow 1593) + (1592 \rightarrow 1595) - (1592 \rightarrow 1594)] +$<br>$+ 0.30[(1592 \rightarrow 1594, 1595)]$                                                                                                            |

$\mu_z$  – magnetic dipole moment along the x axis ( $\beta$  – Bohr magneton);

$M_{xy}$  – electric dipole moment along the xy plane;

$\lambda$  – wavelength;

$f_{vac.}$  – oscillator strength, calculating in a vacuum.

**Table S2.** Molecular orbitals of the compound **3**

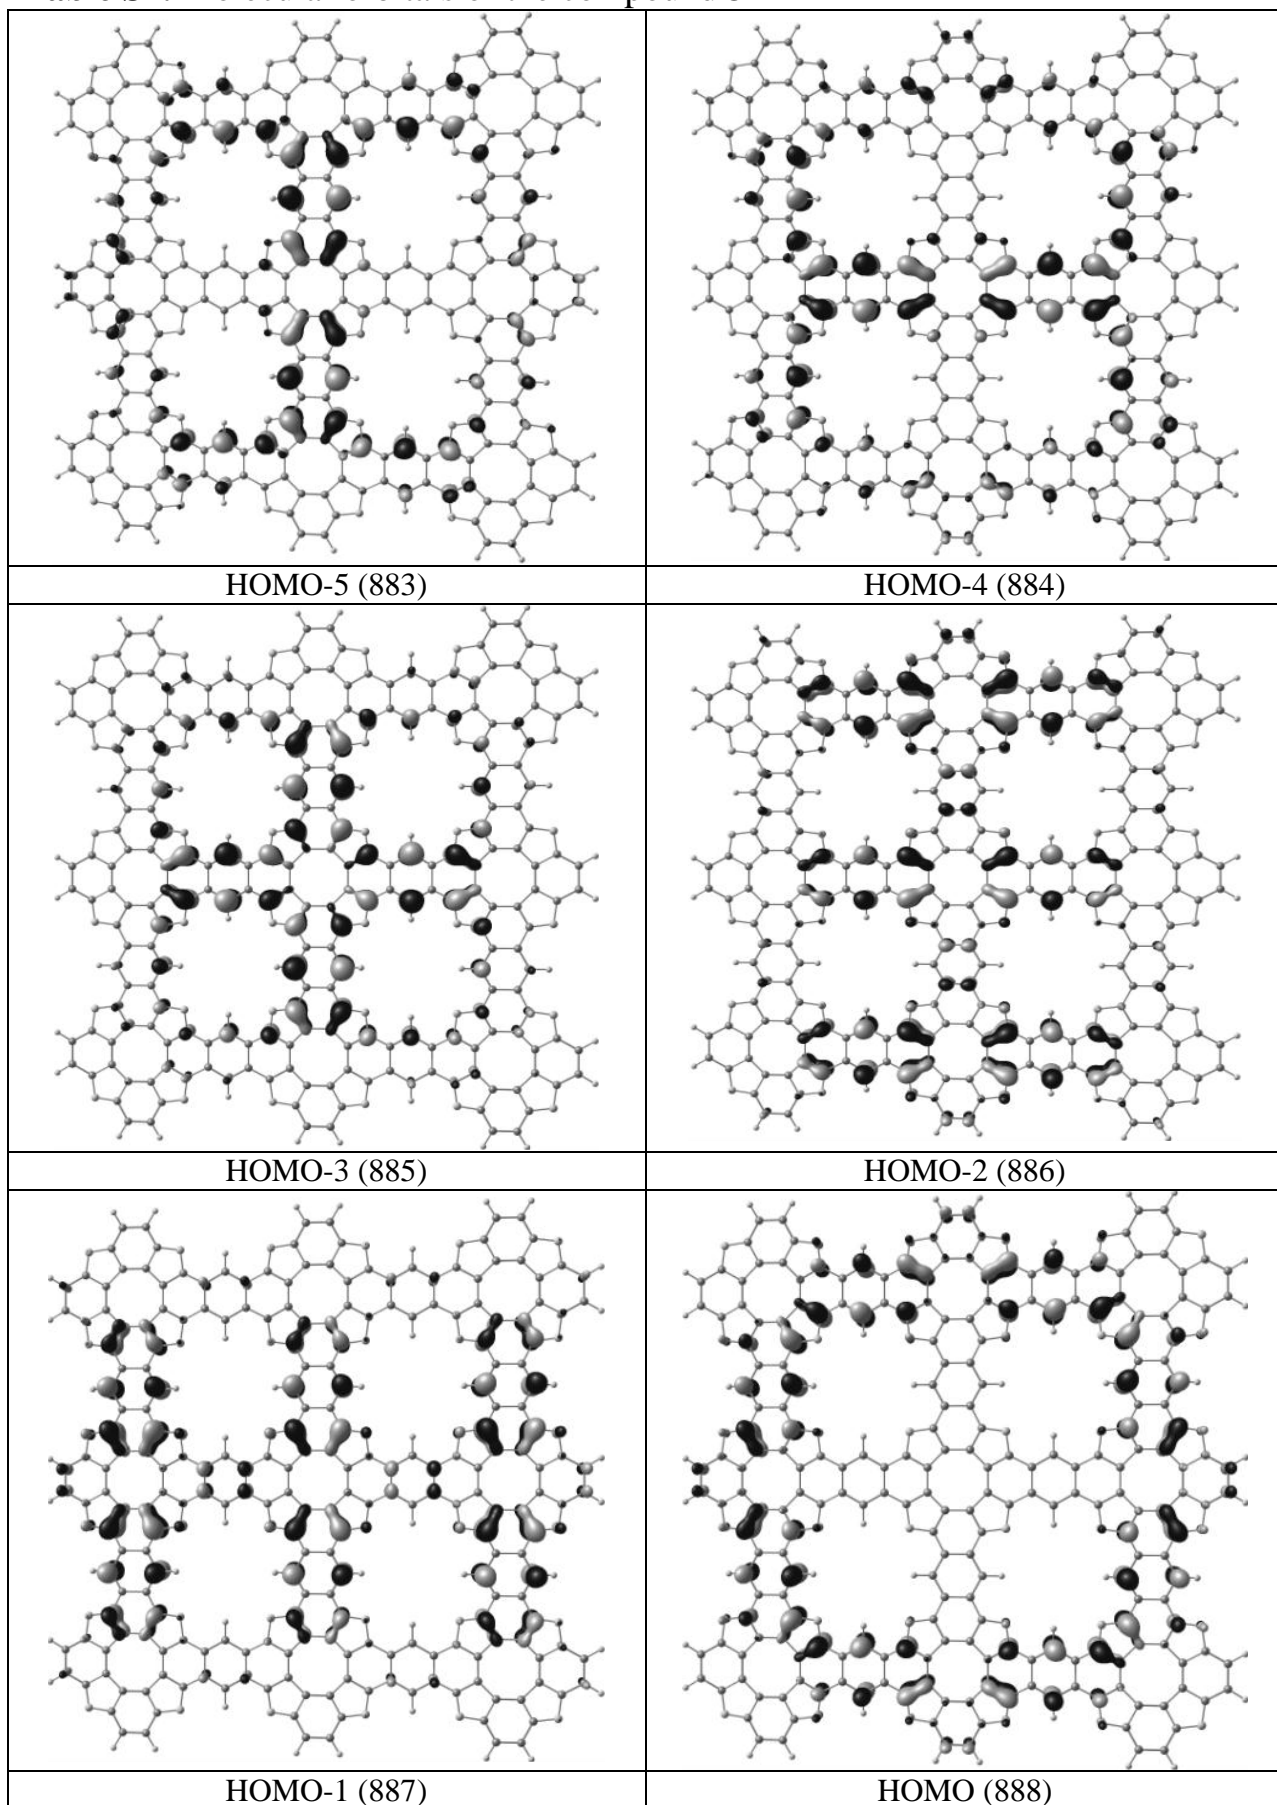

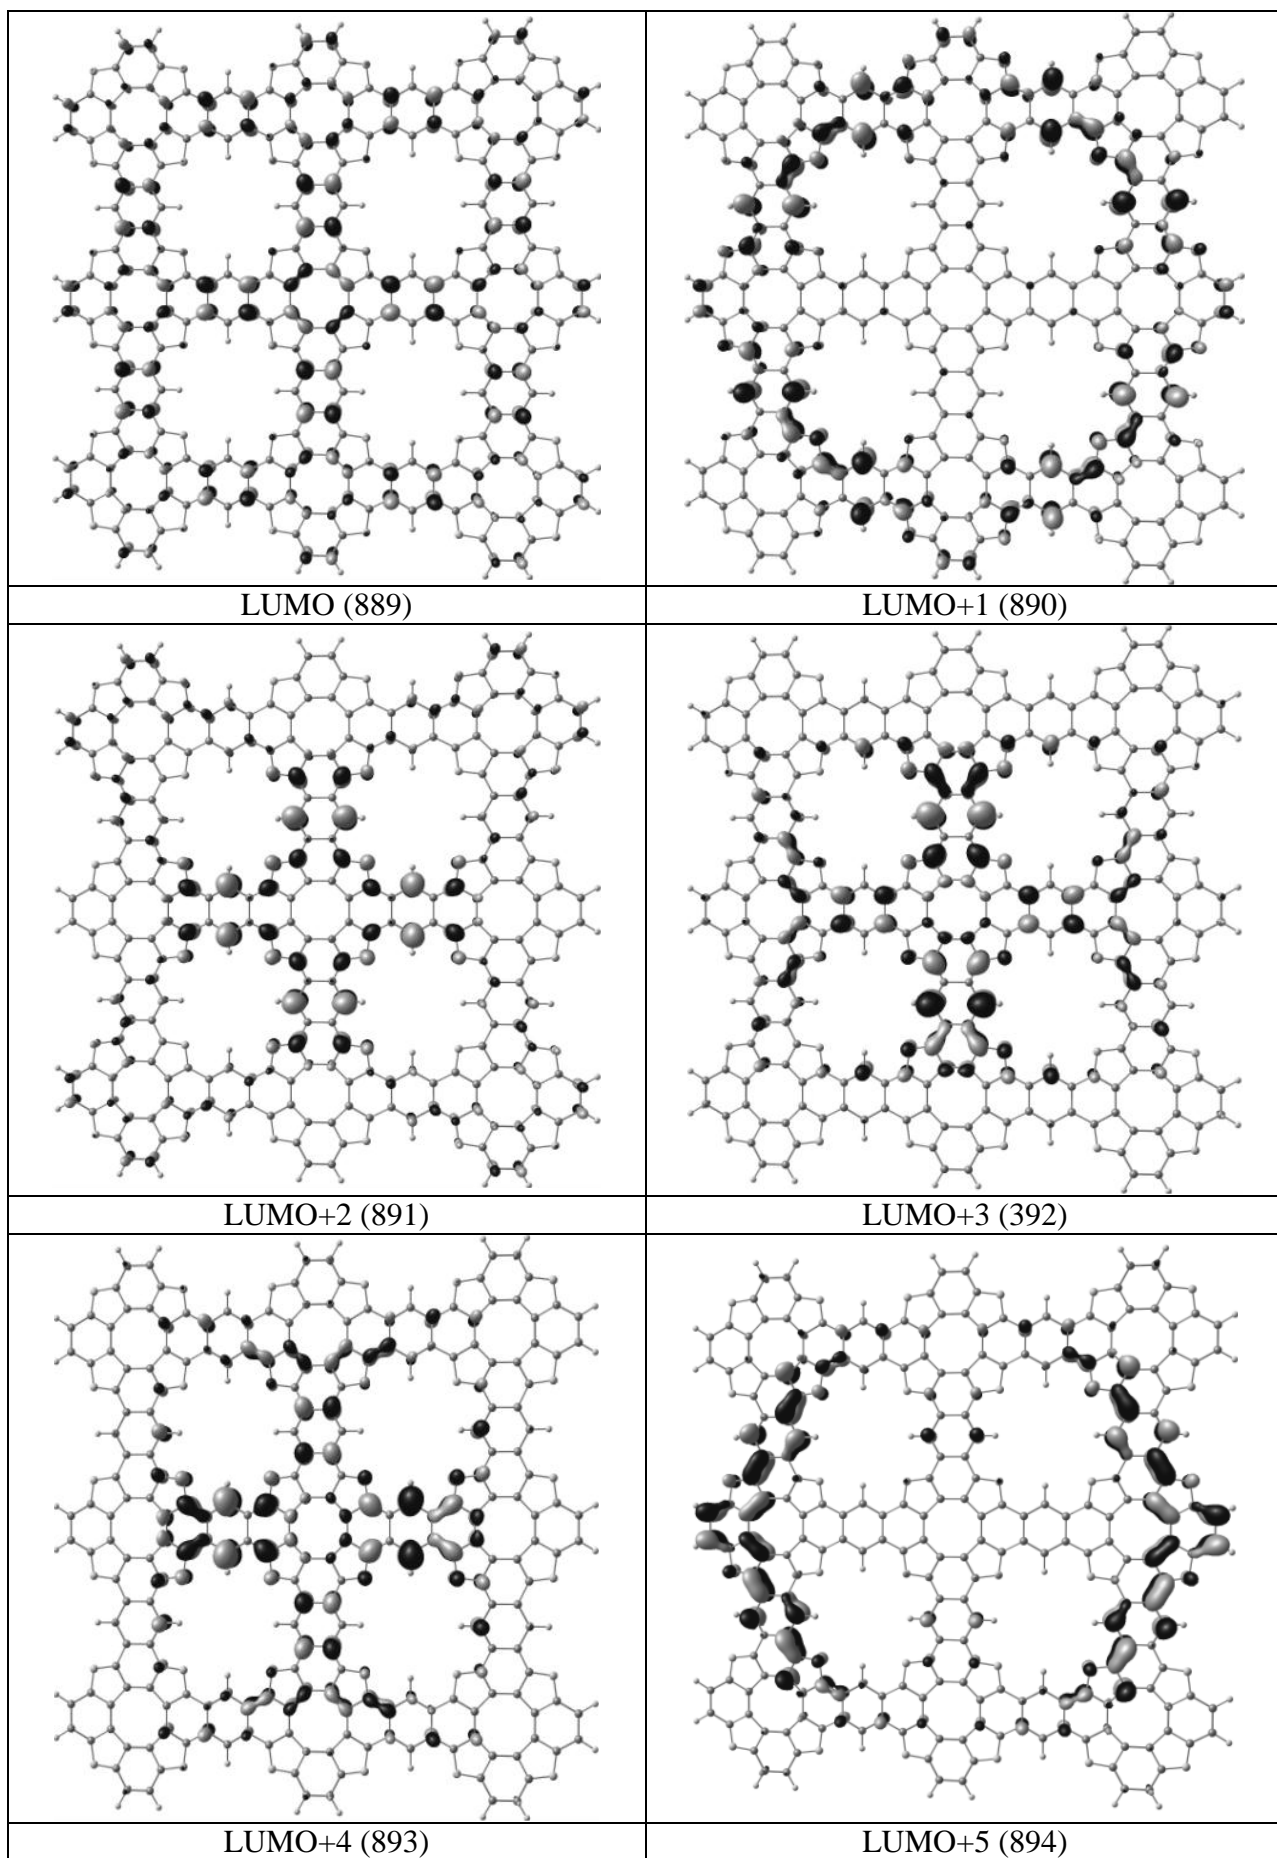

**Table S3.** Total energy of the ground singlet state ( $^1A_{1g}$ ) of the compounds **1–5** at the B3LYP/6–21G(d) level of theory

| Compounds | $E_{tot}, a.u.$ |
|-----------|-----------------|
| 1         | -5177.7656      |
| 2         | -10505.5420     |
| 3         | -11874.9887     |
| 4         | -21311.1052     |
| 5         | -21310.9687     |

The 6-21G(d) double-valence split basis set affords us to optimize all studied systems which consist at the most of 576 atoms (compound **4**). The extension of the chosen basis set prevents optimization of all studied molecules at the uniform level of accuracy. For comparison we have optimized the sheet **1** with the 6-311++G(d,p) basis. The calculated deviations in the structural parameters are negligible (no more than 0.002 Å for the bond lengths) and all conclusions remain. Thus, the choice of the 6-21G(d) basis set is quite justified by a very big size of the studied systems.

**Table S4.** The optimized Cartesian coordinates of the compound **1** calculated at the B3LYP/6–21G(d) level of theory

| Center Number | Atomic Number | Atomic Type | Coordinates (Angstroms) |            |          |
|---------------|---------------|-------------|-------------------------|------------|----------|
|               |               |             | X                       | Y          | Z        |
| 1             | 6             | 0           | 0.000000                | 6.845423   | 0.000000 |
| 2             | 8             | 0           | 2.675869                | 8.182648   | 0.000000 |
| 3             | 6             | 0           | 6.811417                | 2.492841   | 0.000000 |
| 4             | 6             | 0           | 8.376663                | 4.052849   | 0.000000 |
| 5             | 6             | 0           | 8.366859                | 6.800122   | 0.000000 |
| 6             | 6             | 0           | 6.800122                | 8.366859   | 0.000000 |
| 7             | 6             | 0           | 4.052849                | 8.376663   | 0.000000 |
| 8             | 6             | 0           | 2.492841                | 6.811417   | 0.000000 |
| 9             | 6             | 0           | 6.135165                | 3.703715   | 0.000000 |
| 10            | 6             | 0           | 4.714435                | 3.703408   | 0.000000 |
| 11            | 6             | 0           | 3.703408                | 4.714435   | 0.000000 |
| 12            | 6             | 0           | 3.703715                | 6.135165   | 0.000000 |
| 13            | 6             | 0           | 4.722853                | 7.139689   | 0.000000 |
| 14            | 6             | 0           | 6.122585                | 7.135792   | 0.000000 |
| 15            | 6             | 0           | 7.135792                | 6.122585   | 0.000000 |
| 16            | 6             | 0           | 7.139689                | 4.722853   | 0.000000 |
| 17            | 6             | 0           | 4.044740                | 2.487337   | 0.000000 |
| 18            | 6             | 0           | 2.487337                | 4.044740   | 0.000000 |
| 19            | 6             | 0           | 4.698933                | 1.217878   | 0.000000 |
| 20            | 6             | 0           | 6.158965                | 1.219173   | 0.000000 |
| 21            | 6             | 0           | 4.727654                | 9.603604   | 0.000000 |
| 22            | 6             | 0           | 6.130684                | 9.598431   | 0.000000 |
| 23            | 6             | 0           | 1.219173                | 6.158965   | 0.000000 |
| 24            | 6             | 0           | 1.217878                | 4.698933   | 0.000000 |
| 25            | 6             | 0           | 9.598431                | 6.130684   | 0.000000 |
| 26            | 6             | 0           | 9.603604                | 4.727654   | 0.000000 |
| 27            | 8             | 0           | 8.182648                | 2.675869   | 0.000000 |
| 28            | 8             | 0           | 2.673749                | 2.673749   | 0.000000 |
| 29            | 8             | 0           | 8.176134                | 8.176134   | 0.000000 |
| 30            | 1             | 0           | 4.177638                | 10.540021  | 0.000000 |
| 31            | 1             | 0           | 6.687226                | 10.530937  | 0.000000 |
| 32            | 1             | 0           | 10.530937               | 6.687226   | 0.000000 |
| 33            | 1             | 0           | 10.540021               | 4.177638   | 0.000000 |
| 34            | 6             | 0           | 0.000000                | 4.012398   | 0.000000 |
| 35            | 8             | 0           | 2.673749                | -2.673749  | 0.000000 |
| 36            | 6             | 0           | 6.800122                | -8.366859  | 0.000000 |
| 37            | 6             | 0           | 8.366859                | -6.800122  | 0.000000 |
| 38            | 6             | 0           | 8.376663                | -4.052849  | 0.000000 |
| 39            | 6             | 0           | 6.811417                | -2.492841  | 0.000000 |
| 40            | 6             | 0           | 4.044740                | -2.487337  | 0.000000 |
| 41            | 6             | 0           | 2.487337                | -4.044740  | 0.000000 |
| 42            | 6             | 0           | 6.122585                | -7.135792  | 0.000000 |
| 43            | 6             | 0           | 4.722853                | -7.139689  | 0.000000 |
| 44            | 6             | 0           | 3.703715                | -6.135165  | 0.000000 |
| 45            | 6             | 0           | 3.703408                | -4.714435  | 0.000000 |
| 46            | 6             | 0           | 4.714435                | -3.703408  | 0.000000 |
| 47            | 6             | 0           | 6.135165                | -3.703715  | 0.000000 |
| 48            | 6             | 0           | 7.139689                | -4.722853  | 0.000000 |
| 49            | 6             | 0           | 7.135792                | -6.122585  | 0.000000 |
| 50            | 6             | 0           | 4.052849                | -8.376663  | 0.000000 |
| 51            | 6             | 0           | 2.492841                | -6.811417  | 0.000000 |
| 52            | 6             | 0           | 4.727654                | -9.603604  | 0.000000 |
| 53            | 6             | 0           | 6.130684                | -9.598431  | 0.000000 |
| 54            | 6             | 0           | 4.698933                | -1.217878  | 0.000000 |
| 55            | 6             | 0           | 6.158965                | -1.219173  | 0.000000 |
| 56            | 6             | 0           | 1.217878                | -4.698933  | 0.000000 |
| 57            | 6             | 0           | 1.219173                | -6.158965  | 0.000000 |
| 58            | 6             | 0           | 9.603604                | -4.727654  | 0.000000 |
| 59            | 6             | 0           | 9.598431                | -6.130684  | 0.000000 |
| 60            | 8             | 0           | 8.176134                | -8.176134  | 0.000000 |
| 61            | 8             | 0           | 2.675869                | -8.182648  | 0.000000 |
| 62            | 8             | 0           | 8.182648                | -2.675869  | 0.000000 |
| 63            | 1             | 0           | 4.177638                | -10.540021 | 0.000000 |
| 64            | 1             | 0           | 6.687226                | -10.530937 | 0.000000 |
| 65            | 1             | 0           | 10.540021               | -4.177638  | 0.000000 |
| 66            | 1             | 0           | 10.530937               | -6.687226  | 0.000000 |
| 67            | 6             | 0           | 0.000000                | -4.012398  | 0.000000 |
| 68            | 8             | 0           | -8.176134               | 8.176134   | 0.000000 |

|     |   |   |            |            |          |
|-----|---|---|------------|------------|----------|
| 69  | 6 | 0 | -4.044740  | 2.487337   | 0.000000 |
| 70  | 6 | 0 | -2.487337  | 4.044740   | 0.000000 |
| 71  | 6 | 0 | -2.492841  | 6.811417   | 0.000000 |
| 72  | 6 | 0 | -4.052849  | 8.376663   | 0.000000 |
| 73  | 6 | 0 | -6.800122  | 8.366859   | 0.000000 |
| 74  | 6 | 0 | -8.366859  | 6.800122   | 0.000000 |
| 75  | 6 | 0 | -4.714435  | 3.703408   | 0.000000 |
| 76  | 6 | 0 | -6.135165  | 3.703715   | 0.000000 |
| 77  | 6 | 0 | -7.139689  | 4.722853   | 0.000000 |
| 78  | 6 | 0 | -7.135792  | 6.122585   | 0.000000 |
| 79  | 6 | 0 | -6.122585  | 7.135792   | 0.000000 |
| 80  | 6 | 0 | -4.722853  | 7.139689   | 0.000000 |
| 81  | 6 | 0 | -3.703715  | 6.135165   | 0.000000 |
| 82  | 6 | 0 | -3.703408  | 4.714435   | 0.000000 |
| 83  | 6 | 0 | -6.811417  | 2.492841   | 0.000000 |
| 84  | 6 | 0 | -8.376663  | 4.052849   | 0.000000 |
| 85  | 6 | 0 | -6.158965  | 1.219173   | 0.000000 |
| 86  | 6 | 0 | -4.698933  | 1.217878   | 0.000000 |
| 87  | 6 | 0 | -6.130684  | 9.598431   | 0.000000 |
| 88  | 6 | 0 | -4.727654  | 9.603604   | 0.000000 |
| 89  | 6 | 0 | -9.598431  | 6.130684   | 0.000000 |
| 90  | 6 | 0 | -9.603604  | 4.727654   | 0.000000 |
| 91  | 6 | 0 | -1.219173  | 6.158965   | 0.000000 |
| 92  | 6 | 0 | -1.217878  | 4.698933   | 0.000000 |
| 93  | 8 | 0 | -2.673749  | 2.673749   | 0.000000 |
| 94  | 8 | 0 | -8.182648  | 2.675869   | 0.000000 |
| 95  | 8 | 0 | -2.675869  | 8.182648   | 0.000000 |
| 96  | 1 | 0 | -6.687226  | 10.530937  | 0.000000 |
| 97  | 1 | 0 | -4.177638  | 10.540021  | 0.000000 |
| 98  | 1 | 0 | -10.530937 | 6.687226   | 0.000000 |
| 99  | 1 | 0 | -10.540021 | 4.177638   | 0.000000 |
| 100 | 6 | 0 | -6.845423  | 0.000000   | 0.000000 |
| 101 | 8 | 0 | -8.182648  | -2.675869  | 0.000000 |
| 102 | 6 | 0 | -4.052849  | -8.376663  | 0.000000 |
| 103 | 6 | 0 | -2.492841  | -6.811417  | 0.000000 |
| 104 | 6 | 0 | -2.487337  | -4.044740  | 0.000000 |
| 105 | 6 | 0 | -4.044740  | -2.487337  | 0.000000 |
| 106 | 6 | 0 | -6.811417  | -2.492841  | 0.000000 |
| 107 | 6 | 0 | -8.376663  | -4.052849  | 0.000000 |
| 108 | 6 | 0 | -4.722853  | -7.139689  | 0.000000 |
| 109 | 6 | 0 | -6.122585  | -7.135792  | 0.000000 |
| 110 | 6 | 0 | -7.135792  | -6.122585  | 0.000000 |
| 111 | 6 | 0 | -7.139689  | -4.722853  | 0.000000 |
| 112 | 6 | 0 | -6.135165  | -3.703715  | 0.000000 |
| 113 | 6 | 0 | -4.714435  | -3.703408  | 0.000000 |
| 114 | 6 | 0 | -3.703408  | -4.714435  | 0.000000 |
| 115 | 6 | 0 | -3.703715  | -6.135165  | 0.000000 |
| 116 | 6 | 0 | -6.800122  | -8.366859  | 0.000000 |
| 117 | 6 | 0 | -8.366859  | -6.800122  | 0.000000 |
| 118 | 6 | 0 | -6.130684  | -9.598431  | 0.000000 |
| 119 | 6 | 0 | -4.727654  | -9.603604  | 0.000000 |
| 120 | 6 | 0 | -6.158965  | -1.219173  | 0.000000 |
| 121 | 6 | 0 | -4.698933  | -1.217878  | 0.000000 |
| 122 | 6 | 0 | -9.603604  | -4.727654  | 0.000000 |
| 123 | 6 | 0 | -9.598431  | -6.130684  | 0.000000 |
| 124 | 6 | 0 | -1.217878  | -4.698933  | 0.000000 |
| 125 | 6 | 0 | -1.219173  | -6.158965  | 0.000000 |
| 126 | 8 | 0 | -2.675869  | -8.182648  | 0.000000 |
| 127 | 8 | 0 | -8.176134  | -8.176134  | 0.000000 |
| 128 | 8 | 0 | -2.673749  | -2.673749  | 0.000000 |
| 129 | 1 | 0 | -6.687226  | -10.530937 | 0.000000 |
| 130 | 1 | 0 | -4.177638  | -10.540021 | 0.000000 |
| 131 | 1 | 0 | -10.540021 | -4.177638  | 0.000000 |
| 132 | 1 | 0 | -10.530937 | -6.687226  | 0.000000 |
| 133 | 6 | 0 | -4.012398  | 0.000000   | 0.000000 |
| 134 | 6 | 0 | 0.000000   | -6.845423  | 0.000000 |
| 135 | 6 | 0 | 4.012398   | 0.000000   | 0.000000 |
| 136 | 6 | 0 | 6.845423   | 0.000000   | 0.000000 |
| 137 | 1 | 0 | 0.000000   | 7.932189   | 0.000000 |
| 138 | 1 | 0 | 0.000000   | 2.925650   | 0.000000 |
| 139 | 1 | 0 | 0.000000   | -2.925650  | 0.000000 |
| 140 | 1 | 0 | -7.932189  | 0.000000   | 0.000000 |
| 141 | 1 | 0 | -2.925650  | 0.000000   | 0.000000 |
| 142 | 1 | 0 | 0.000000   | -7.932189  | 0.000000 |
| 143 | 1 | 0 | 2.925650   | 0.000000   | 0.000000 |
| 144 | 1 | 0 | 7.932189   | 0.000000   | 0.000000 |



**Table S5.** The optimized Cartesian coordinates of the compound **2** calculated at the B3LYP/6–21G(d) level of theory

| Center<br>Number | Atomic<br>Number | Coordinates (Angstroms) |           |           |
|------------------|------------------|-------------------------|-----------|-----------|
|                  |                  | X                       | Y         | Z         |
| 1                | 6                | 0.000000                | 6.851387  | 0.000000  |
| 2                | 6                | 0.000000                | 0.000000  | 4.006471  |
| 3                | 8                | 0.000000                | 2.679004  | 2.672386  |
| 4                | 6                | 0.000000                | 6.814643  | 8.355459  |
| 5                | 6                | 0.000000                | 8.380687  | 6.796451  |
| 6                | 6                | 0.000000                | 8.381472  | 4.053165  |
| 7                | 6                | 0.000000                | 6.816354  | 2.493277  |
| 8                | 6                | 0.000000                | 4.050632  | 2.486575  |
| 9                | 6                | 0.000000                | 2.490883  | 4.042617  |
| 10               | 6                | 0.000000                | 6.139177  | 7.143602  |
| 11               | 6                | 0.000000                | 4.718323  | 7.144256  |
| 12               | 6                | 0.000000                | 3.707356  | 6.134258  |
| 13               | 6                | 0.000000                | 3.707586  | 4.712792  |
| 14               | 6                | 0.000000                | 4.719166  | 3.703408  |
| 15               | 6                | 0.000000                | 6.140112  | 3.704699  |
| 16               | 6                | 0.000000                | 7.144858  | 4.723651  |
| 17               | 6                | 0.000000                | 7.144462  | 6.125158  |
| 18               | 6                | 0.000000                | 4.049170  | 8.360847  |
| 19               | 6                | 0.000000                | 2.490376  | 6.803817  |
| 20               | 6                | 0.000000                | 4.702769  | 9.629927  |
| 21               | 6                | 0.000000                | 6.162736  | 9.628871  |
| 22               | 6                | 0.000000                | 4.704973  | 1.217675  |
| 23               | 6                | 0.000000                | 6.165207  | 1.219205  |
| 24               | 6                | 0.000000                | 1.218640  | 4.693070  |
| 25               | 6                | 0.000000                | 1.218552  | 6.152718  |
| 26               | 6                | 0.000000                | 9.611388  | 4.723981  |
| 27               | 6                | 0.000000                | 9.610987  | 6.126254  |
| 28               | 8                | 0.000000                | 8.185605  | 8.172358  |
| 29               | 8                | 0.000000                | 2.677706  | 8.174260  |
| 30               | 8                | 0.000000                | 8.187209  | 2.677115  |
| 31               | 1                | 0.000000                | 10.545484 | 4.170262  |
| 32               | 1                | 0.000000                | 10.544740 | 6.680554  |
| 33               | 6                | 0.000000                | 0.000000  | 6.839360  |
| 34               | 8                | 0.000000                | 2.674914  | 13.520584 |
| 35               | 6                | 0.000000                | 6.799455  | 19.215468 |
| 36               | 6                | 0.000000                | 8.366614  | 17.649551 |
| 37               | 6                | 0.000000                | 8.377538  | 14.902190 |
| 38               | 6                | 0.000000                | 6.813239  | 13.341534 |
| 39               | 6                | 0.000000                | 4.046378  | 13.334996 |
| 40               | 6                | 0.000000                | 2.487928  | 14.891886 |
| 41               | 6                | 0.000000                | 6.122325  | 17.984214 |
| 42               | 6                | 0.000000                | 4.722477  | 17.987446 |
| 43               | 6                | 0.000000                | 3.703767  | 16.982581 |
| 44               | 6                | 0.000000                | 3.703976  | 15.561876 |
| 45               | 6                | 0.000000                | 4.715337  | 14.551440 |
| 46               | 6                | 0.000000                | 6.136208  | 14.552064 |
| 47               | 6                | 0.000000                | 7.140297  | 15.571589 |
| 48               | 6                | 0.000000                | 7.135889  | 16.971459 |
| 49               | 6                | 0.000000                | 4.052106  | 19.224160 |
| 50               | 6                | 0.000000                | 2.492659  | 17.658538 |
| 51               | 6                | 0.000000                | 4.726558  | 20.451346 |
| 52               | 6                | 0.000000                | 6.129481  | 20.446689 |
| 53               | 6                | 0.000000                | 4.701354  | 12.065838 |
| 54               | 6                | 0.000000                | 6.161668  | 12.067379 |
| 55               | 6                | 0.000000                | 1.218172  | 15.545765 |
| 56               | 6                | 0.000000                | 1.219193  | 17.005879 |
| 57               | 6                | 0.000000                | 9.604169  | 15.577619 |
| 58               | 6                | 0.000000                | 9.598369  | 16.980521 |
| 59               | 8                | 0.000000                | 8.175188  | 19.025111 |
| 60               | 8                | 0.000000                | 2.675108  | 19.029520 |
| 61               | 8                | 0.000000                | 8.183973  | 13.525069 |
| 62               | 1                | 0.000000                | 4.176071  | 21.387515 |
| 63               | 1                | 0.000000                | 6.685445  | 21.379476 |
| 64               | 1                | 0.000000                | 10.540778 | 15.027956 |
| 65               | 1                | 0.000000                | 10.530685 | 17.537269 |
| 66               | 6                | 0.000000                | 0.000000  | 14.859146 |
| 67               | 8                | 0.000000                | -8.187209 | 2.677115  |
| 68               | 6                | 0.000000                | -4.049170 | 8.360847  |

|     |   |          |            |            |
|-----|---|----------|------------|------------|
| 69  | 6 | 0.000000 | -2.490376  | 6.803817   |
| 70  | 6 | 0.000000 | -2.490883  | 4.042617   |
| 71  | 6 | 0.000000 | -4.050632  | 2.486575   |
| 72  | 6 | 0.000000 | -6.816354  | 2.493277   |
| 73  | 6 | 0.000000 | -8.381472  | 4.053165   |
| 74  | 6 | 0.000000 | -4.718323  | 7.144256   |
| 75  | 6 | 0.000000 | -6.139177  | 7.143602   |
| 76  | 6 | 0.000000 | -7.144462  | 6.125158   |
| 77  | 6 | 0.000000 | -7.144858  | 4.723651   |
| 78  | 6 | 0.000000 | -6.140112  | 3.704699   |
| 79  | 6 | 0.000000 | -4.719166  | 3.703408   |
| 80  | 6 | 0.000000 | -3.707586  | 4.712792   |
| 81  | 6 | 0.000000 | -3.707356  | 6.134258   |
| 82  | 6 | 0.000000 | -6.814643  | 8.355459   |
| 83  | 6 | 0.000000 | -8.380687  | 6.796451   |
| 84  | 6 | 0.000000 | -6.162736  | 9.628871   |
| 85  | 6 | 0.000000 | -4.702769  | 9.629927   |
| 86  | 6 | 0.000000 | -6.165207  | 1.219205   |
| 87  | 6 | 0.000000 | -4.704973  | 1.217675   |
| 88  | 6 | 0.000000 | -9.611388  | 4.723981   |
| 89  | 6 | 0.000000 | -9.610987  | 6.126254   |
| 90  | 6 | 0.000000 | -1.218640  | 4.693070   |
| 91  | 6 | 0.000000 | -1.218552  | 6.152718   |
| 92  | 8 | 0.000000 | -2.677706  | 8.174260   |
| 93  | 8 | 0.000000 | -8.185605  | 8.172358   |
| 94  | 8 | 0.000000 | -2.679004  | 2.672386   |
| 95  | 1 | 0.000000 | -10.545484 | 4.170262   |
| 96  | 1 | 0.000000 | -10.544740 | 6.680554   |
| 97  | 6 | 0.000000 | -6.848555  | 10.848668  |
| 98  | 8 | 0.000000 | -8.183973  | 13.525069  |
| 99  | 6 | 0.000000 | -4.052106  | 19.224160  |
| 100 | 6 | 0.000000 | -2.492659  | 17.658538  |
| 101 | 6 | 0.000000 | -2.487928  | 14.891886  |
| 102 | 6 | 0.000000 | -4.046378  | 13.334996  |
| 103 | 6 | 0.000000 | -6.813239  | 13.341534  |
| 104 | 6 | 0.000000 | -8.377538  | 14.902190  |
| 105 | 6 | 0.000000 | -4.722477  | 17.987446  |
| 106 | 6 | 0.000000 | -6.122325  | 17.984214  |
| 107 | 6 | 0.000000 | -7.135889  | 16.971459  |
| 108 | 6 | 0.000000 | -7.140297  | 15.571589  |
| 109 | 6 | 0.000000 | -6.136208  | 14.552064  |
| 110 | 6 | 0.000000 | -4.715337  | 14.551440  |
| 111 | 6 | 0.000000 | -3.703976  | 15.561876  |
| 112 | 6 | 0.000000 | -3.703767  | 16.982581  |
| 113 | 6 | 0.000000 | -6.799455  | 19.215468  |
| 114 | 6 | 0.000000 | -8.366614  | 17.649551  |
| 115 | 6 | 0.000000 | -6.129481  | 20.446689  |
| 116 | 6 | 0.000000 | -4.726558  | 20.451346  |
| 117 | 6 | 0.000000 | -6.161668  | 12.067379  |
| 118 | 6 | 0.000000 | -4.701354  | 12.065838  |
| 119 | 6 | 0.000000 | -9.604169  | 15.577619  |
| 120 | 6 | 0.000000 | -9.598369  | 16.980521  |
| 121 | 6 | 0.000000 | -1.218172  | 15.545765  |
| 122 | 6 | 0.000000 | -1.219193  | 17.005879  |
| 123 | 8 | 0.000000 | -2.675108  | 19.029520  |
| 124 | 8 | 0.000000 | -8.175188  | 19.025111  |
| 125 | 8 | 0.000000 | -2.674914  | 13.520584  |
| 126 | 1 | 0.000000 | -6.685445  | 21.379476  |
| 127 | 1 | 0.000000 | -4.176071  | 21.387515  |
| 128 | 1 | 0.000000 | -10.540778 | 15.027956  |
| 129 | 1 | 0.000000 | -10.530685 | 17.537269  |
| 130 | 6 | 0.000000 | -4.015357  | 10.847718  |
| 131 | 6 | 0.000000 | 0.000000   | 17.692167  |
| 132 | 6 | 0.000000 | 4.015357   | 10.847718  |
| 133 | 6 | 0.000000 | 6.848555   | 10.848668  |
| 134 | 1 | 0.000000 | 0.000000   | 2.919406   |
| 135 | 1 | 0.000000 | 0.000000   | 7.926556   |
| 136 | 1 | 0.000000 | 0.000000   | 13.771805  |
| 137 | 1 | 0.000000 | -7.935056  | 10.849476  |
| 138 | 1 | 0.000000 | -2.928015  | 10.847193  |
| 139 | 1 | 0.000000 | 0.000000   | 18.778792  |
| 140 | 1 | 0.000000 | 2.928015   | 10.847193  |
| 141 | 1 | 0.000000 | 7.935056   | 10.849476  |
| 142 | 6 | 0.000000 | 0.000000   | -17.692167 |
| 143 | 8 | 0.000000 | 2.675108   | -19.029520 |
| 144 | 6 | 0.000000 | 6.813239   | -13.341534 |
| 145 | 6 | 0.000000 | 8.377538   | -14.902190 |
| 146 | 6 | 0.000000 | 8.366614   | -17.649551 |
| 147 | 6 | 0.000000 | 6.799455   | -19.215468 |

|     |   |          |           |            |
|-----|---|----------|-----------|------------|
| 148 | 6 | 0.000000 | 4.052106  | -19.224160 |
| 149 | 6 | 0.000000 | 2.492659  | -17.658538 |
| 150 | 6 | 0.000000 | 6.136208  | -14.552064 |
| 151 | 6 | 0.000000 | 4.715337  | -14.551440 |
| 152 | 6 | 0.000000 | 3.703976  | -15.561876 |
| 153 | 6 | 0.000000 | 3.703767  | -16.982581 |
| 154 | 6 | 0.000000 | 4.722477  | -17.987446 |
| 155 | 6 | 0.000000 | 6.122325  | -17.984214 |
| 156 | 6 | 0.000000 | 7.135889  | -16.971459 |
| 157 | 6 | 0.000000 | 7.140297  | -15.571589 |
| 158 | 6 | 0.000000 | 4.046378  | -13.334996 |
| 159 | 6 | 0.000000 | 2.487928  | -14.891886 |
| 160 | 6 | 0.000000 | 4.701354  | -12.065838 |
| 161 | 6 | 0.000000 | 6.161668  | -12.067379 |
| 162 | 6 | 0.000000 | 4.726558  | -20.451346 |
| 163 | 6 | 0.000000 | 6.129481  | -20.446689 |
| 164 | 6 | 0.000000 | 1.219193  | -17.005879 |
| 165 | 6 | 0.000000 | 1.218172  | -15.545765 |
| 166 | 6 | 0.000000 | 9.598369  | -16.980521 |
| 167 | 6 | 0.000000 | 9.604169  | -15.577619 |
| 168 | 8 | 0.000000 | 8.183973  | -13.525069 |
| 169 | 8 | 0.000000 | 2.674914  | -13.520584 |
| 170 | 8 | 0.000000 | 8.175188  | -19.025111 |
| 171 | 1 | 0.000000 | 4.176071  | -21.387515 |
| 172 | 1 | 0.000000 | 6.685445  | -21.379476 |
| 173 | 1 | 0.000000 | 10.530685 | -17.537269 |
| 174 | 1 | 0.000000 | 10.540778 | -15.027956 |
| 175 | 6 | 0.000000 | 0.000000  | -14.859146 |
| 176 | 8 | 0.000000 | 2.677706  | -8.174260  |
| 177 | 6 | 0.000000 | 6.816354  | -2.493277  |
| 178 | 6 | 0.000000 | 8.381472  | -4.053165  |
| 179 | 6 | 0.000000 | 8.380687  | -6.796451  |
| 180 | 6 | 0.000000 | 6.814643  | -8.355459  |
| 181 | 6 | 0.000000 | 4.049170  | -8.360847  |
| 182 | 6 | 0.000000 | 2.490376  | -6.803817  |
| 183 | 6 | 0.000000 | 6.140112  | -3.704699  |
| 184 | 6 | 0.000000 | 4.719166  | -3.703408  |
| 185 | 6 | 0.000000 | 3.707586  | -4.712792  |
| 186 | 6 | 0.000000 | 3.707356  | -6.134258  |
| 187 | 6 | 0.000000 | 4.718323  | -7.144256  |
| 188 | 6 | 0.000000 | 6.139177  | -7.143602  |
| 189 | 6 | 0.000000 | 7.144462  | -6.125158  |
| 190 | 6 | 0.000000 | 7.144858  | -4.723651  |
| 191 | 6 | 0.000000 | 4.050632  | -2.486575  |
| 192 | 6 | 0.000000 | 2.490883  | -4.042617  |
| 193 | 6 | 0.000000 | 4.704973  | -1.217675  |
| 194 | 6 | 0.000000 | 4.702769  | -9.629927  |
| 195 | 6 | 0.000000 | 6.162736  | -9.628871  |
| 196 | 6 | 0.000000 | 1.218552  | -6.152718  |
| 197 | 6 | 0.000000 | 1.218640  | -4.693070  |
| 198 | 6 | 0.000000 | 9.610987  | -6.126254  |
| 199 | 6 | 0.000000 | 9.611388  | -4.723981  |
| 200 | 8 | 0.000000 | 8.187209  | -2.677115  |
| 201 | 8 | 0.000000 | 2.679004  | -2.672386  |
| 202 | 8 | 0.000000 | 8.185605  | -8.172358  |
| 203 | 1 | 0.000000 | 10.544740 | -6.680554  |
| 204 | 1 | 0.000000 | 10.545484 | -4.170262  |
| 205 | 6 | 0.000000 | 0.000000  | -6.839360  |
| 206 | 8 | 0.000000 | -8.175188 | -19.025111 |
| 207 | 6 | 0.000000 | -4.046378 | -13.334996 |
| 208 | 6 | 0.000000 | -2.487928 | -14.891886 |
| 209 | 6 | 0.000000 | -2.492659 | -17.658538 |
| 210 | 6 | 0.000000 | -4.052106 | -19.224160 |
| 211 | 6 | 0.000000 | -6.799455 | -19.215468 |
| 212 | 6 | 0.000000 | -8.366614 | -17.649551 |
| 213 | 6 | 0.000000 | -4.715337 | -14.551440 |
| 214 | 6 | 0.000000 | -6.136208 | -14.552064 |
| 215 | 6 | 0.000000 | -7.140297 | -15.571589 |
| 216 | 6 | 0.000000 | -7.135889 | -16.971459 |
| 217 | 6 | 0.000000 | -6.122325 | -17.984214 |
| 218 | 6 | 0.000000 | -4.722477 | -17.987446 |
| 219 | 6 | 0.000000 | -3.703767 | -16.982581 |
| 220 | 6 | 0.000000 | -3.703976 | -15.561876 |
| 221 | 6 | 0.000000 | -6.813239 | -13.341534 |
| 222 | 6 | 0.000000 | -8.377538 | -14.902190 |
| 223 | 6 | 0.000000 | -6.161668 | -12.067379 |
| 224 | 6 | 0.000000 | -4.701354 | -12.065838 |
| 225 | 6 | 0.000000 | -6.129481 | -20.446689 |
| 226 | 6 | 0.000000 | -4.726558 | -20.451346 |

|     |   |          |            |            |
|-----|---|----------|------------|------------|
| 227 | 6 | 0.000000 | -9.598369  | -16.980521 |
| 228 | 6 | 0.000000 | -9.604169  | -15.577619 |
| 229 | 6 | 0.000000 | -1.219193  | -17.005879 |
| 230 | 6 | 0.000000 | -1.218172  | -15.545765 |
| 231 | 8 | 0.000000 | -2.674914  | -13.520584 |
| 232 | 8 | 0.000000 | -8.183973  | -13.525069 |
| 233 | 8 | 0.000000 | -2.675108  | -19.029520 |
| 234 | 1 | 0.000000 | -6.685445  | -21.379476 |
| 235 | 1 | 0.000000 | -4.176071  | -21.387515 |
| 236 | 1 | 0.000000 | -10.530685 | -17.537269 |
| 237 | 1 | 0.000000 | -10.540778 | -15.027956 |
| 238 | 6 | 0.000000 | -6.848555  | -10.848668 |
| 239 | 8 | 0.000000 | -8.185605  | -8.172358  |
| 240 | 6 | 0.000000 | -4.050632  | -2.486575  |
| 241 | 6 | 0.000000 | -2.490883  | -4.042617  |
| 242 | 6 | 0.000000 | -2.490376  | -6.803817  |
| 243 | 6 | 0.000000 | -4.049170  | -8.360847  |
| 244 | 6 | 0.000000 | -6.814643  | -8.355459  |
| 245 | 6 | 0.000000 | -8.380687  | -6.796451  |
| 246 | 6 | 0.000000 | -4.719166  | -3.703408  |
| 247 | 6 | 0.000000 | -6.140112  | -3.704699  |
| 248 | 6 | 0.000000 | -7.144858  | -4.723651  |
| 249 | 6 | 0.000000 | -7.144462  | -6.125158  |
| 250 | 6 | 0.000000 | -6.139177  | -7.143602  |
| 251 | 6 | 0.000000 | -4.718323  | -7.144256  |
| 252 | 6 | 0.000000 | -3.707356  | -6.134258  |
| 253 | 6 | 0.000000 | -3.707586  | -4.712792  |
| 254 | 6 | 0.000000 | -6.816354  | -2.493277  |
| 255 | 6 | 0.000000 | -8.381472  | -4.053165  |
| 256 | 6 | 0.000000 | -6.165207  | -1.219205  |
| 257 | 6 | 0.000000 | -4.704973  | -1.217675  |
| 258 | 6 | 0.000000 | -6.162736  | -9.628871  |
| 259 | 6 | 0.000000 | -4.702769  | -9.629927  |
| 260 | 6 | 0.000000 | -9.610987  | -6.126254  |
| 261 | 6 | 0.000000 | -9.611388  | -4.723981  |
| 262 | 6 | 0.000000 | -1.218552  | -6.152718  |
| 263 | 6 | 0.000000 | -1.218640  | -4.693070  |
| 264 | 8 | 0.000000 | -2.679004  | -2.672386  |
| 265 | 8 | 0.000000 | -8.187209  | -2.677115  |
| 266 | 8 | 0.000000 | -2.677706  | -8.174260  |
| 267 | 6 | 0.000000 | -6.851387  | 0.000000   |
| 268 | 6 | 0.000000 | -4.018511  | 0.000000   |
| 269 | 1 | 0.000000 | -10.544740 | -6.680554  |
| 270 | 1 | 0.000000 | -10.545484 | -4.170262  |
| 271 | 6 | 0.000000 | -4.015357  | -10.847718 |
| 272 | 6 | 0.000000 | 0.000000   | -4.006471  |
| 273 | 6 | 0.000000 | 4.015357   | -10.847718 |
| 274 | 6 | 0.000000 | 6.848555   | -10.848668 |
| 275 | 1 | 0.000000 | 0.000000   | -18.778792 |
| 276 | 1 | 0.000000 | 0.000000   | -13.771805 |
| 277 | 1 | 0.000000 | 0.000000   | -7.926556  |
| 278 | 1 | 0.000000 | -7.935056  | -10.849476 |
| 279 | 1 | 0.000000 | -2.928015  | -10.847193 |
| 280 | 1 | 0.000000 | 0.000000   | -2.919406  |
| 281 | 1 | 0.000000 | 2.928015   | -10.847193 |
| 282 | 1 | 0.000000 | 7.935056   | -10.849476 |
| 283 | 6 | 0.000000 | 6.165207   | -1.219205  |
| 284 | 6 | 0.000000 | 4.018511   | 0.000000   |
| 285 | 1 | 0.000000 | 7.937927   | 0.000000   |
| 286 | 1 | 0.000000 | -7.937927  | 0.000000   |
| 287 | 1 | 0.000000 | -2.931213  | 0.000000   |
| 288 | 1 | 0.000000 | 2.931213   | 0.000000   |

---

**Table S6.** The optimized Cartesian coordinates of the compound **3** calculated at the B3LYP/6–21G(d) level of theory

| Center Number | Atomic Number | Atomic Type | Coordinates (Angstroms) |            |          |
|---------------|---------------|-------------|-------------------------|------------|----------|
|               |               |             | X                       | Y          | Z        |
| 1             | 6             | 0           | 1.416685                | 5.428279   | 0.000000 |
| 2             | 6             | 0           | -5.424031               | 9.440472   | 0.000000 |
| 3             | 8             | 0           | -2.750439               | 8.104727   | 0.000000 |
| 4             | 6             | 0           | 1.371872                | 13.806657  | 0.000000 |
| 5             | 6             | 0           | 2.931727                | 12.241016  | 0.000000 |
| 6             | 6             | 0           | 2.937353                | 9.475562   | 0.000000 |
| 7             | 6             | 0           | 1.380550                | 7.917626   | 0.000000 |
| 8             | 6             | 0           | -1.380550               | 7.917626   | 0.000000 |
| 9             | 6             | 0           | -2.937353               | 9.475562   | 0.000000 |
| 10            | 6             | 0           | 0.700791                | 12.570287  | 0.000000 |
| 11            | 6             | 0           | -0.700791               | 12.570287  | 0.000000 |
| 12            | 6             | 0           | -1.719934               | 11.565552  | 0.000000 |
| 13            | 6             | 0           | -1.720975               | 10.144995  | 0.000000 |
| 14            | 6             | 0           | -0.710732               | 9.134220   | 0.000000 |
| 15            | 6             | 0           | 0.710732                | 9.134220   | 0.000000 |
| 16            | 6             | 0           | 1.720975                | 10.144995  | 0.000000 |
| 17            | 6             | 0           | 1.719934                | 11.565552  | 0.000000 |
| 18            | 6             | 0           | -1.371872               | 13.806657  | 0.000000 |
| 19            | 6             | 0           | -2.931727               | 12.241016  | 0.000000 |
| 20            | 6             | 0           | 0.701191                | 15.036700  | 0.000000 |
| 21            | 6             | 0           | -0.729642               | 6.646135   | 0.000000 |
| 22            | 6             | 0           | 0.729642                | 6.646135   | 0.000000 |
| 23            | 6             | 0           | -4.206571               | 10.128645  | 0.000000 |
| 24            | 6             | 0           | -4.205361               | 11.588552  | 0.000000 |
| 25            | 6             | 0           | 4.206571                | 10.128645  | 0.000000 |
| 26            | 6             | 0           | 4.205361                | 11.588552  | 0.000000 |
| 27            | 8             | 0           | 2.747936                | 13.612169  | 0.000000 |
| 28            | 8             | 0           | -2.747936               | 13.612169  | 0.000000 |
| 29            | 8             | 0           | 2.750439                | 8.104727   | 0.000000 |
| 30            | 6             | 0           | -5.425813               | 12.273483  | 0.000000 |
| 31            | 8             | 0           | -13.608514              | 8.101486   | 0.000000 |
| 32            | 6             | 0           | -9.478304               | 13.802300  | 0.000000 |
| 33            | 6             | 0           | -7.918342               | 12.237644  | 0.000000 |
| 34            | 6             | 0           | -7.912304               | 9.469951   | 0.000000 |
| 35            | 6             | 0           | -9.469951               | 7.912304   | 0.000000 |
| 36            | 6             | 0           | -12.237644              | 7.918342   | 0.000000 |
| 37            | 6             | 0           | -13.802300              | 9.478304   | 0.000000 |
| 38            | 6             | 0           | -10.148298              | 12.565315  | 0.000000 |
| 39            | 6             | 0           | -11.548232              | 12.561489  | 0.000000 |
| 40            | 6             | 0           | -12.561489              | 11.548232  | 0.000000 |
| 41            | 6             | 0           | -12.565315              | 10.148298  | 0.000000 |
| 42            | 6             | 0           | -11.560755              | 9.128934   | 0.000000 |
| 43            | 6             | 0           | -10.139659              | 9.128445   | 0.000000 |
| 44            | 6             | 0           | -9.128445               | 10.139659  | 0.000000 |
| 45            | 6             | 0           | -9.128934               | 11.560755  | 0.000000 |
| 46            | 6             | 0           | -12.225957              | 13.792455  | 0.000000 |
| 47            | 6             | 0           | -13.792455              | 12.225957  | 0.000000 |
| 48            | 6             | 0           | -11.556329              | 15.023861  | 0.000000 |
| 49            | 6             | 0           | -10.153400              | 15.029073  | 0.000000 |
| 50            | 6             | 0           | -11.585668              | 6.644315   | 0.000000 |
| 51            | 6             | 0           | -10.125285              | 6.642741   | 0.000000 |
| 52            | 6             | 0           | -15.029073              | 10.153400  | 0.000000 |
| 53            | 6             | 0           | -15.023861              | 11.556329  | 0.000000 |
| 54            | 6             | 0           | -6.642741               | 10.125285  | 0.000000 |
| 55            | 6             | 0           | -6.644315               | 11.585668  | 0.000000 |
| 56            | 8             | 0           | -8.101486               | 13.608514  | 0.000000 |
| 57            | 8             | 0           | -13.601666              | 13.601666  | 0.000000 |
| 58            | 8             | 0           | -8.098849               | 8.098849   | 0.000000 |
| 59            | 1             | 0           | -15.965532              | 9.603466   | 0.000000 |
| 60            | 1             | 0           | -15.956393              | 12.112710  | 0.000000 |
| 61            | 1             | 0           | -5.422544               | 8.353681   | 0.000000 |
| 62            | 1             | 0           | -5.427733               | 13.360173  | 0.000000 |
| 63            | 6             | 0           | -5.425813               | -12.273483 | 0.000000 |
| 64            | 8             | 0           | -2.747936               | -13.612169 | 0.000000 |
| 65            | 6             | 0           | 1.380550                | -7.917626  | 0.000000 |
| 66            | 6             | 0           | 2.937353                | -9.475562  | 0.000000 |
| 67            | 6             | 0           | 2.931727                | -12.241016 | 0.000000 |
| 68            | 6             | 0           | 1.371872                | -13.806657 | 0.000000 |

|     |   |   |            |            |          |
|-----|---|---|------------|------------|----------|
| 69  | 6 | 0 | -1.371872  | -13.806657 | 0.000000 |
| 70  | 6 | 0 | -2.931727  | -12.241016 | 0.000000 |
| 71  | 6 | 0 | 0.710732   | -9.134220  | 0.000000 |
| 72  | 6 | 0 | -0.710732  | -9.134220  | 0.000000 |
| 73  | 6 | 0 | -1.720975  | -10.144995 | 0.000000 |
| 74  | 6 | 0 | -1.719934  | -11.565552 | 0.000000 |
| 75  | 6 | 0 | -0.700791  | -12.570287 | 0.000000 |
| 76  | 6 | 0 | 0.700791   | -12.570287 | 0.000000 |
| 77  | 6 | 0 | 1.719934   | -11.565552 | 0.000000 |
| 78  | 6 | 0 | 1.720975   | -10.144995 | 0.000000 |
| 79  | 6 | 0 | -1.380550  | -7.917626  | 0.000000 |
| 80  | 6 | 0 | -2.937353  | -9.475562  | 0.000000 |
| 81  | 6 | 0 | -0.729642  | -6.646135  | 0.000000 |
| 82  | 6 | 0 | 0.729642   | -6.646135  | 0.000000 |
| 83  | 6 | 0 | -0.701191  | -15.036700 | 0.000000 |
| 84  | 6 | 0 | 0.701191   | -15.036700 | 0.000000 |
| 85  | 6 | 0 | -4.205361  | -11.588552 | 0.000000 |
| 86  | 6 | 0 | -4.206571  | -10.128645 | 0.000000 |
| 87  | 6 | 0 | 4.205361   | -11.588552 | 0.000000 |
| 88  | 6 | 0 | 4.206571   | -10.128645 | 0.000000 |
| 89  | 8 | 0 | 2.750439   | -8.104727  | 0.000000 |
| 90  | 8 | 0 | -2.750439  | -8.104727  | 0.000000 |
| 91  | 8 | 0 | 2.747936   | -13.612169 | 0.000000 |
| 92  | 1 | 0 | -1.255078  | -15.970752 | 0.000000 |
| 93  | 1 | 0 | 1.255078   | -15.970752 | 0.000000 |
| 94  | 6 | 0 | 5.425813   | -12.273483 | 0.000000 |
| 95  | 6 | 0 | 5.424031   | -9.440472  | 0.000000 |
| 96  | 6 | 0 | -5.424031  | -9.440472  | 0.000000 |
| 97  | 8 | 0 | -2.751292  | -2.751292  | 0.000000 |
| 98  | 6 | 0 | 1.381140   | 2.938609   | 0.000000 |
| 99  | 6 | 0 | 2.938609   | 1.381140   | 0.000000 |
| 100 | 6 | 0 | 2.938609   | -1.381140  | 0.000000 |
| 101 | 6 | 0 | 1.381140   | -2.938609  | 0.000000 |
| 102 | 6 | 0 | -1.381140  | -2.938609  | 0.000000 |
| 103 | 6 | 0 | -2.938609  | -1.381140  | 0.000000 |
| 104 | 6 | 0 | 0.711105   | 1.721809   | 0.000000 |
| 105 | 6 | 0 | -0.711105  | 1.721809   | 0.000000 |
| 106 | 6 | 0 | -1.721809  | 0.711105   | 0.000000 |
| 107 | 6 | 0 | -1.721809  | -0.711105  | 0.000000 |
| 108 | 6 | 0 | -0.711105  | -1.721809  | 0.000000 |
| 109 | 6 | 0 | 0.711105   | -1.721809  | 0.000000 |
| 110 | 6 | 0 | 1.721809   | -0.711105  | 0.000000 |
| 111 | 6 | 0 | 1.721809   | 0.711105   | 0.000000 |
| 112 | 6 | 0 | -1.381140  | 2.938609   | 0.000000 |
| 113 | 6 | 0 | -2.938609  | 1.381140   | 0.000000 |
| 114 | 6 | 0 | -0.729781  | 4.210080   | 0.000000 |
| 115 | 6 | 0 | -0.729781  | -4.210080  | 0.000000 |
| 116 | 6 | 0 | 0.729781   | -4.210080  | 0.000000 |
| 117 | 6 | 0 | -4.210080  | -0.729781  | 0.000000 |
| 118 | 6 | 0 | -4.210080  | 0.729781   | 0.000000 |
| 119 | 6 | 0 | 4.210080   | -0.729781  | 0.000000 |
| 120 | 6 | 0 | 4.210080   | 0.729781   | 0.000000 |
| 121 | 8 | 0 | 2.751292   | 2.751292   | 0.000000 |
| 122 | 8 | 0 | -2.751292  | 2.751292   | 0.000000 |
| 123 | 8 | 0 | 2.751292   | -2.751292  | 0.000000 |
| 124 | 6 | 0 | -5.428279  | -1.416685  | 0.000000 |
| 125 | 8 | 0 | -13.601666 | -13.601666 | 0.000000 |
| 126 | 6 | 0 | -9.469951  | -7.912304  | 0.000000 |
| 127 | 6 | 0 | -7.912304  | -9.469951  | 0.000000 |
| 128 | 6 | 0 | -7.918342  | -12.237644 | 0.000000 |
| 129 | 6 | 0 | -9.478304  | -13.802300 | 0.000000 |
| 130 | 6 | 0 | -12.225957 | -13.792455 | 0.000000 |
| 131 | 6 | 0 | -13.792455 | -12.225957 | 0.000000 |
| 132 | 6 | 0 | -10.139659 | -9.128445  | 0.000000 |
| 133 | 6 | 0 | -11.560755 | -9.128934  | 0.000000 |
| 134 | 6 | 0 | -12.565315 | -10.148298 | 0.000000 |
| 135 | 6 | 0 | -12.561489 | -11.548232 | 0.000000 |
| 136 | 6 | 0 | -11.548232 | -12.561489 | 0.000000 |
| 137 | 6 | 0 | -10.148298 | -12.565315 | 0.000000 |
| 138 | 6 | 0 | -9.128934  | -11.560755 | 0.000000 |
| 139 | 6 | 0 | -9.128445  | -10.139659 | 0.000000 |
| 140 | 6 | 0 | -12.237644 | -7.918342  | 0.000000 |
| 141 | 6 | 0 | -13.802300 | -9.478304  | 0.000000 |
| 142 | 6 | 0 | -11.585668 | -6.644315  | 0.000000 |
| 143 | 6 | 0 | -10.125285 | -6.642741  | 0.000000 |
| 144 | 6 | 0 | -11.556329 | -15.023861 | 0.000000 |
| 145 | 6 | 0 | -10.153400 | -15.029073 | 0.000000 |
| 146 | 6 | 0 | -15.023861 | -11.556329 | 0.000000 |
| 147 | 6 | 0 | -15.029073 | -10.153400 | 0.000000 |

|     |   |   |            |            |          |
|-----|---|---|------------|------------|----------|
| 148 | 6 | 0 | -6.644315  | -11.585668 | 0.000000 |
| 149 | 6 | 0 | -6.642741  | -10.125285 | 0.000000 |
| 150 | 8 | 0 | -8.098849  | -8.098849  | 0.000000 |
| 151 | 8 | 0 | -13.608514 | -8.101486  | 0.000000 |
| 152 | 8 | 0 | -8.101486  | -13.608514 | 0.000000 |
| 153 | 1 | 0 | -12.112710 | -15.956393 | 0.000000 |
| 154 | 1 | 0 | -9.603466  | -15.965532 | 0.000000 |
| 155 | 1 | 0 | -15.956393 | -12.112710 | 0.000000 |
| 156 | 1 | 0 | -15.965532 | -9.603466  | 0.000000 |
| 157 | 6 | 0 | -12.273483 | -5.425813  | 0.000000 |
| 158 | 8 | 0 | -13.612169 | -2.747936  | 0.000000 |
| 159 | 6 | 0 | -9.475562  | 2.937353   | 0.000000 |
| 160 | 6 | 0 | -7.917626  | 1.380550   | 0.000000 |
| 161 | 6 | 0 | -7.917626  | -1.380550  | 0.000000 |
| 162 | 6 | 0 | -9.475562  | -2.937353  | 0.000000 |
| 163 | 6 | 0 | -12.241016 | -2.931727  | 0.000000 |
| 164 | 6 | 0 | -13.806657 | -1.371872  | 0.000000 |
| 165 | 6 | 0 | -10.144995 | 1.720975   | 0.000000 |
| 166 | 6 | 0 | -11.565552 | 1.719934   | 0.000000 |
| 167 | 6 | 0 | -12.570287 | 0.700791   | 0.000000 |
| 168 | 6 | 0 | -12.570287 | -0.700791  | 0.000000 |
| 169 | 6 | 0 | -11.565552 | -1.719934  | 0.000000 |
| 170 | 6 | 0 | -10.144995 | -1.720975  | 0.000000 |
| 171 | 6 | 0 | -9.134220  | -0.710732  | 0.000000 |
| 172 | 6 | 0 | -9.134220  | 0.710732   | 0.000000 |
| 173 | 6 | 0 | -12.241016 | 2.931727   | 0.000000 |
| 174 | 6 | 0 | -13.806657 | 1.371872   | 0.000000 |
| 175 | 6 | 0 | -11.588552 | 4.205361   | 0.000000 |
| 176 | 6 | 0 | -10.128645 | 4.206571   | 0.000000 |
| 177 | 6 | 0 | -11.588552 | -4.205361  | 0.000000 |
| 178 | 6 | 0 | -10.128645 | -4.206571  | 0.000000 |
| 179 | 6 | 0 | -15.036700 | -0.701191  | 0.000000 |
| 180 | 6 | 0 | -15.036700 | 0.701191   | 0.000000 |
| 181 | 6 | 0 | -6.646135  | -0.729642  | 0.000000 |
| 182 | 6 | 0 | -6.646135  | 0.729642   | 0.000000 |
| 183 | 8 | 0 | -8.104727  | 2.750439   | 0.000000 |
| 184 | 8 | 0 | -13.612169 | 2.747936   | 0.000000 |
| 185 | 8 | 0 | -8.104727  | -2.750439  | 0.000000 |
| 186 | 6 | 0 | -12.273483 | 5.425813   | 0.000000 |
| 187 | 6 | 0 | -9.440472  | 5.424031   | 0.000000 |
| 188 | 1 | 0 | -15.970752 | -1.255078  | 0.000000 |
| 189 | 1 | 0 | -15.970752 | 1.255078   | 0.000000 |
| 190 | 6 | 0 | -9.440472  | -5.424031  | 0.000000 |
| 191 | 6 | 0 | -5.428279  | 1.416685   | 0.000000 |
| 192 | 6 | 0 | -1.416685  | -5.428279  | 0.000000 |
| 193 | 6 | 0 | 1.416685   | -5.428279  | 0.000000 |
| 194 | 1 | 0 | -5.427733  | -13.360173 | 0.000000 |
| 195 | 1 | 0 | -5.422544  | -8.353681  | 0.000000 |
| 196 | 1 | 0 | -5.428003  | -2.503371  | 0.000000 |
| 197 | 1 | 0 | -13.360173 | -5.427733  | 0.000000 |
| 198 | 1 | 0 | -8.353681  | -5.422544  | 0.000000 |
| 199 | 1 | 0 | -5.428003  | 2.503371   | 0.000000 |
| 200 | 1 | 0 | -2.503371  | -5.428003  | 0.000000 |
| 201 | 1 | 0 | 2.503371   | -5.428003  | 0.000000 |
| 202 | 6 | 0 | 0.729781   | 4.210080   | 0.000000 |
| 203 | 6 | 0 | -1.416685  | 5.428279   | 0.000000 |
| 204 | 1 | 0 | 2.503371   | 5.428003   | 0.000000 |
| 205 | 1 | 0 | -13.360173 | 5.427733   | 0.000000 |
| 206 | 1 | 0 | -8.353681  | 5.422544   | 0.000000 |
| 207 | 1 | 0 | -2.503371  | 5.428003   | 0.000000 |
| 208 | 6 | 0 | 5.428279   | -1.416685  | 0.000000 |
| 209 | 8 | 0 | 8.098849   | 8.098849   | 0.000000 |
| 210 | 6 | 0 | 12.225957  | 13.792455  | 0.000000 |
| 211 | 6 | 0 | 13.792455  | 12.225957  | 0.000000 |
| 212 | 6 | 0 | 13.802300  | 9.478304   | 0.000000 |
| 213 | 6 | 0 | 12.237644  | 7.918342   | 0.000000 |
| 214 | 6 | 0 | 9.469951   | 7.912304   | 0.000000 |
| 215 | 6 | 0 | 7.912304   | 9.469951   | 0.000000 |
| 216 | 6 | 0 | 11.548232  | 12.561489  | 0.000000 |
| 217 | 6 | 0 | 10.148298  | 12.565315  | 0.000000 |
| 218 | 6 | 0 | 9.128934   | 11.560755  | 0.000000 |
| 219 | 6 | 0 | 9.128445   | 10.139659  | 0.000000 |
| 220 | 6 | 0 | 10.139659  | 9.128445   | 0.000000 |
| 221 | 6 | 0 | 11.560755  | 9.128934   | 0.000000 |
| 222 | 6 | 0 | 12.565315  | 10.148298  | 0.000000 |
| 223 | 6 | 0 | 12.561489  | 11.548232  | 0.000000 |
| 224 | 6 | 0 | 9.478304   | 13.802300  | 0.000000 |
| 225 | 6 | 0 | 7.918342   | 12.237644  | 0.000000 |
| 226 | 6 | 0 | 10.153400  | 15.029073  | 0.000000 |

|     |   |   |           |            |          |
|-----|---|---|-----------|------------|----------|
| 227 | 6 | 0 | 11.556329 | 15.023861  | 0.000000 |
| 228 | 6 | 0 | 10.125285 | 6.642741   | 0.000000 |
| 229 | 6 | 0 | 11.585668 | 6.644315   | 0.000000 |
| 230 | 6 | 0 | 6.642741  | 10.125285  | 0.000000 |
| 231 | 6 | 0 | 6.644315  | 11.585668  | 0.000000 |
| 232 | 6 | 0 | 15.023861 | 11.556329  | 0.000000 |
| 233 | 8 | 0 | 13.601666 | 13.601666  | 0.000000 |
| 234 | 8 | 0 | 8.101486  | 13.608514  | 0.000000 |
| 235 | 8 | 0 | 13.608514 | 8.101486   | 0.000000 |
| 236 | 8 | 0 | 8.101486  | -13.608514 | 0.000000 |
| 237 | 6 | 0 | 12.237644 | -7.918342  | 0.000000 |
| 238 | 6 | 0 | 13.802300 | -9.478304  | 0.000000 |
| 239 | 6 | 0 | 13.792455 | -12.225957 | 0.000000 |
| 240 | 6 | 0 | 12.225957 | -13.792455 | 0.000000 |
| 241 | 6 | 0 | 9.478304  | -13.802300 | 0.000000 |
| 242 | 6 | 0 | 7.918342  | -12.237644 | 0.000000 |
| 243 | 6 | 0 | 11.560755 | -9.128934  | 0.000000 |
| 244 | 6 | 0 | 10.139659 | -9.128445  | 0.000000 |
| 245 | 6 | 0 | 9.128445  | -10.139659 | 0.000000 |
| 246 | 6 | 0 | 9.128934  | -11.560755 | 0.000000 |
| 247 | 6 | 0 | 10.148298 | -12.565315 | 0.000000 |
| 248 | 6 | 0 | 11.548232 | -12.561489 | 0.000000 |
| 249 | 6 | 0 | 12.561489 | -11.548232 | 0.000000 |
| 250 | 6 | 0 | 12.565315 | -10.148298 | 0.000000 |
| 251 | 6 | 0 | 9.469951  | -7.912304  | 0.000000 |
| 252 | 6 | 0 | 7.912304  | -9.469951  | 0.000000 |
| 253 | 6 | 0 | 10.125285 | -6.642741  | 0.000000 |
| 254 | 6 | 0 | 11.585668 | -6.644315  | 0.000000 |
| 255 | 6 | 0 | 10.153400 | -15.029073 | 0.000000 |
| 256 | 6 | 0 | 11.556329 | -15.023861 | 0.000000 |
| 257 | 6 | 0 | 6.644315  | -11.585668 | 0.000000 |
| 258 | 6 | 0 | 6.642741  | -10.125285 | 0.000000 |
| 259 | 6 | 0 | 15.023861 | -11.556329 | 0.000000 |
| 260 | 6 | 0 | 15.029073 | -10.153400 | 0.000000 |
| 261 | 8 | 0 | 13.608514 | -8.101486  | 0.000000 |
| 262 | 8 | 0 | 8.098849  | -8.098849  | 0.000000 |
| 263 | 8 | 0 | 13.601666 | -13.601666 | 0.000000 |
| 264 | 1 | 0 | 9.603466  | -15.965532 | 0.000000 |
| 265 | 1 | 0 | 12.112710 | -15.956393 | 0.000000 |
| 266 | 6 | 0 | 9.440472  | -5.424031  | 0.000000 |
| 267 | 8 | 0 | 8.104727  | -2.750439  | 0.000000 |
| 268 | 6 | 0 | 12.241016 | 2.931727   | 0.000000 |
| 269 | 6 | 0 | 13.806657 | 1.371872   | 0.000000 |
| 270 | 6 | 0 | 13.806657 | -1.371872  | 0.000000 |
| 271 | 6 | 0 | 12.241016 | -2.931727  | 0.000000 |
| 272 | 6 | 0 | 9.475562  | -2.937353  | 0.000000 |
| 273 | 6 | 0 | 7.917626  | -1.380550  | 0.000000 |
| 274 | 6 | 0 | 11.565552 | 1.719934   | 0.000000 |
| 275 | 6 | 0 | 10.144995 | 1.720975   | 0.000000 |
| 276 | 6 | 0 | 9.134220  | 0.710732   | 0.000000 |
| 277 | 6 | 0 | 9.134220  | -0.710732  | 0.000000 |
| 278 | 6 | 0 | 10.144995 | -1.720975  | 0.000000 |
| 279 | 6 | 0 | 11.565552 | -1.719934  | 0.000000 |
| 280 | 6 | 0 | 12.570287 | -0.700791  | 0.000000 |
| 281 | 6 | 0 | 12.570287 | 0.700791   | 0.000000 |
| 282 | 6 | 0 | 9.475562  | 2.937353   | 0.000000 |
| 283 | 6 | 0 | 7.917626  | 1.380550   | 0.000000 |
| 284 | 6 | 0 | 10.128645 | 4.206571   | 0.000000 |
| 285 | 6 | 0 | 11.588552 | 4.205361   | 0.000000 |
| 286 | 6 | 0 | 10.128645 | -4.206571  | 0.000000 |
| 287 | 6 | 0 | 11.588552 | -4.205361  | 0.000000 |
| 288 | 6 | 0 | 6.646135  | -0.729642  | 0.000000 |
| 289 | 6 | 0 | 6.646135  | 0.729642   | 0.000000 |
| 290 | 6 | 0 | 15.036700 | -0.701191  | 0.000000 |
| 291 | 6 | 0 | 15.036700 | 0.701191   | 0.000000 |
| 292 | 8 | 0 | 13.612169 | 2.747936   | 0.000000 |
| 293 | 8 | 0 | 8.104727  | 2.750439   | 0.000000 |
| 294 | 8 | 0 | 13.612169 | -2.747936  | 0.000000 |
| 295 | 6 | 0 | 9.440472  | 5.424031   | 0.000000 |
| 296 | 6 | 0 | 12.273483 | 5.425813   | 0.000000 |
| 297 | 6 | 0 | 12.273483 | -5.425813  | 0.000000 |
| 298 | 1 | 0 | 8.353681  | -5.422544  | 0.000000 |
| 299 | 1 | 0 | 13.360173 | -5.427733  | 0.000000 |
| 300 | 1 | 0 | 8.353681  | 5.422544   | 0.000000 |
| 301 | 1 | 0 | 13.360173 | 5.427733   | 0.000000 |
| 302 | 6 | 0 | 5.428279  | 1.416685   | 0.000000 |
| 303 | 6 | 0 | 5.424031  | 9.440472   | 0.000000 |
| 304 | 6 | 0 | 5.425813  | 12.273483  | 0.000000 |
| 305 | 1 | 0 | 5.427733  | -13.360173 | 0.000000 |



|     |   |   |            |            |          |
|-----|---|---|------------|------------|----------|
| 306 | 1 | 0 | 5.422544   | -8.353681  | 0.000000 |
| 307 | 1 | 0 | 5.428003   | -2.503371  | 0.000000 |
| 308 | 1 | 0 | 5.428003   | 2.503371   | 0.000000 |
| 309 | 1 | 0 | 5.422544   | 8.353681   | 0.000000 |
| 310 | 1 | 0 | 5.427733   | 13.360173  | 0.000000 |
| 311 | 6 | 0 | -0.701191  | 15.036700  | 0.000000 |
| 312 | 1 | 0 | -12.112710 | 15.956393  | 0.000000 |
| 313 | 1 | 0 | -9.603466  | 15.965532  | 0.000000 |
| 314 | 1 | 0 | 9.603466   | 15.965532  | 0.000000 |
| 315 | 1 | 0 | 12.112710  | 15.956393  | 0.000000 |
| 316 | 1 | 0 | 15.956393  | -12.112710 | 0.000000 |
| 317 | 1 | 0 | 15.965532  | -9.603466  | 0.000000 |
| 318 | 1 | 0 | 15.970752  | -1.255078  | 0.000000 |
| 319 | 1 | 0 | 15.970752  | 1.255078   | 0.000000 |
| 320 | 1 | 0 | -1.255078  | 15.970752  | 0.000000 |
| 321 | 6 | 0 | 15.029073  | 10.153400  | 0.000000 |
| 322 | 1 | 0 | 1.255078   | 15.970752  | 0.000000 |
| 323 | 1 | 0 | 15.956393  | 12.112710  | 0.000000 |
| 324 | 1 | 0 | 15.965532  | 9.603466   | 0.000000 |

---

**Table S7.** The optimized Cartesian coordinates of the compound **4** calculated at the B3LYP/6–21G(d) level of theory

| Center Number | Atomic Number | Atomic Type | Coordinates (Angstroms) |           |          |
|---------------|---------------|-------------|-------------------------|-----------|----------|
|               |               |             | X                       | Y         | Z        |
| 1             | 6             | 0           | 0.000000                | 4.010847  | 0.000000 |
| 2             | 6             | 0           | 4.009279                | 10.855673 | 0.000000 |
| 3             | 8             | 0           | 2.676790                | 8.178415  | 0.000000 |
| 4             | 6             | 0           | 8.366000                | 4.047073  | 0.000000 |
| 5             | 6             | 0           | 6.808087                | 2.489586  | 0.000000 |
| 6             | 6             | 0           | 4.047184                | 2.489608  | 0.000000 |
| 7             | 6             | 0           | 2.489608                | 4.047184  | 0.000000 |
| 8             | 6             | 0           | 2.489586                | 6.808087  | 0.000000 |
| 9             | 6             | 0           | 4.047073                | 8.366000  | 0.000000 |
| 10            | 6             | 0           | 7.149149                | 4.716947  | 0.000000 |
| 11            | 6             | 0           | 7.149298                | 6.138837  | 0.000000 |
| 12            | 6             | 0           | 6.138837                | 7.149298  | 0.000000 |
| 13            | 6             | 0           | 4.716947                | 7.149149  | 0.000000 |
| 14            | 6             | 0           | 3.706593                | 6.138676  | 0.000000 |
| 15            | 6             | 0           | 3.706481                | 4.716863  | 0.000000 |
| 16            | 6             | 0           | 4.716863                | 3.706481  | 0.000000 |
| 17            | 6             | 0           | 6.138676                | 3.706593  | 0.000000 |
| 18            | 6             | 0           | 8.366391                | 6.808315  | 0.000000 |
| 19            | 6             | 0           | 6.808315                | 8.366391  | 0.000000 |
| 20            | 6             | 0           | 9.637989                | 6.156841  | 0.000000 |
| 21            | 6             | 0           | 9.637800                | 4.697281  | 0.000000 |
| 22            | 6             | 0           | 1.218109                | 6.157311  | 0.000000 |
| 23            | 6             | 0           | 1.218070                | 4.697795  | 0.000000 |
| 24            | 6             | 0           | 4.697281                | 9.637800  | 0.000000 |
| 25            | 6             | 0           | 6.156841                | 9.637989  | 0.000000 |
| 26            | 6             | 0           | 4.697795                | 1.218070  | 0.000000 |
| 27            | 6             | 0           | 6.157311                | 1.218109  | 0.000000 |
| 28            | 8             | 0           | 8.178415                | 2.676790  | 0.000000 |
| 29            | 8             | 0           | 8.178746                | 8.178746  | 0.000000 |
| 30            | 8             | 0           | 2.677034                | 2.677034  | 0.000000 |
| 31            | 6             | 0           | 6.842462                | 10.856938 | 0.000000 |
| 32            | 8             | 0           | 13.532481               | 8.175240  | 0.000000 |
| 33            | 6             | 0           | 19.236016               | 4.055208  | 0.000000 |
| 34            | 6             | 0           | 17.671544               | 2.494419  | 0.000000 |
| 35            | 6             | 0           | 14.905693               | 2.487393  | 0.000000 |
| 36            | 6             | 0           | 13.346475               | 4.043877  | 0.000000 |
| 37            | 6             | 0           | 13.346062               | 6.805109  | 0.000000 |
| 38            | 6             | 0           | 14.903550               | 8.362473  | 0.000000 |
| 39            | 6             | 0           | 17.999238               | 4.725464  | 0.000000 |
| 40            | 6             | 0           | 17.998664               | 6.127118  | 0.000000 |
| 41            | 6             | 0           | 16.993650               | 7.145805  | 0.000000 |
| 42            | 6             | 0           | 15.573166               | 7.146165  | 0.000000 |
| 43            | 6             | 0           | 14.562891               | 6.135581  | 0.000000 |
| 44            | 6             | 0           | 14.563124               | 4.713993  | 0.000000 |
| 45            | 6             | 0           | 15.574352               | 3.704232  | 0.000000 |
| 46            | 6             | 0           | 16.995086               | 3.705838  | 0.000000 |
| 47            | 6             | 0           | 19.234714               | 6.798794  | 0.000000 |
| 48            | 6             | 0           | 17.668699               | 8.357898  | 0.000000 |
| 49            | 6             | 0           | 20.465132               | 6.128757  | 0.000000 |
| 50            | 6             | 0           | 20.465809               | 4.726421  | 0.000000 |
| 51            | 6             | 0           | 12.074555               | 6.154452  | 0.000000 |
| 52            | 6             | 0           | 12.074524               | 4.694906  | 0.000000 |
| 53            | 6             | 0           | 15.556005               | 9.631977  | 0.000000 |
| 54            | 6             | 0           | 17.015903               | 9.631303  | 0.000000 |
| 55            | 6             | 0           | 15.560017               | 1.218268  | 0.000000 |
| 56            | 6             | 0           | 17.020419               | 1.219933  | 0.000000 |
| 57            | 8             | 0           | 19.042407               | 2.679089  | 0.000000 |
| 58            | 8             | 0           | 19.039547               | 8.174606  | 0.000000 |
| 59            | 8             | 0           | 13.534162               | 2.673766  | 0.000000 |
| 60            | 1             | 0           | 21.398940               | 6.683070  | 0.000000 |
| 61            | 1             | 0           | 21.400129               | 4.172901  | 0.000000 |
| 62            | 6             | 0           | 14.867177               | 10.849214 | 0.000000 |
| 63            | 8             | 0           | 2.679089                | 19.042407 | 0.000000 |
| 64            | 6             | 0           | 8.362473                | 14.903550 | 0.000000 |
| 65            | 6             | 0           | 6.805109                | 13.346062 | 0.000000 |
| 66            | 6             | 0           | 4.043877                | 13.346475 | 0.000000 |
| 67            | 6             | 0           | 2.487393                | 14.905693 | 0.000000 |
| 68            | 6             | 0           | 2.494419                | 17.671544 | 0.000000 |
| 69            | 6             | 0           | 4.055208                | 19.236016 | 0.000000 |

|     |   |   |            |           |          |
|-----|---|---|------------|-----------|----------|
| 70  | 6 | 0 | 7.146165   | 15.573166 | 0.000000 |
| 71  | 6 | 0 | 7.145805   | 16.993650 | 0.000000 |
| 72  | 6 | 0 | 6.127118   | 17.998664 | 0.000000 |
| 73  | 6 | 0 | 4.725464   | 17.999238 | 0.000000 |
| 74  | 6 | 0 | 3.705838   | 16.995086 | 0.000000 |
| 75  | 6 | 0 | 3.704232   | 15.574352 | 0.000000 |
| 76  | 6 | 0 | 4.713993   | 14.563124 | 0.000000 |
| 77  | 6 | 0 | 6.135581   | 14.562891 | 0.000000 |
| 78  | 6 | 0 | 8.357898   | 17.668699 | 0.000000 |
| 79  | 6 | 0 | 6.798794   | 19.234714 | 0.000000 |
| 80  | 6 | 0 | 9.631303   | 17.015903 | 0.000000 |
| 81  | 6 | 0 | 9.631977   | 15.556005 | 0.000000 |
| 82  | 6 | 0 | 1.219933   | 17.020419 | 0.000000 |
| 83  | 6 | 0 | 1.218268   | 15.560017 | 0.000000 |
| 84  | 6 | 0 | 4.726421   | 20.465809 | 0.000000 |
| 85  | 6 | 0 | 6.128757   | 20.465132 | 0.000000 |
| 86  | 6 | 0 | 4.694906   | 12.074524 | 0.000000 |
| 87  | 6 | 0 | 6.154452   | 12.074555 | 0.000000 |
| 88  | 8 | 0 | 8.175240   | 13.532481 | 0.000000 |
| 89  | 8 | 0 | 8.174606   | 19.039547 | 0.000000 |
| 90  | 8 | 0 | 2.673766   | 13.534162 | 0.000000 |
| 91  | 1 | 0 | 4.172901   | 21.400129 | 0.000000 |
| 92  | 1 | 0 | 6.683070   | 21.398940 | 0.000000 |
| 93  | 6 | 0 | 10.852017  | 17.700159 | 0.000000 |
| 94  | 8 | 0 | 13.527340  | 19.034148 | 0.000000 |
| 95  | 6 | 0 | 19.228018  | 14.904228 | 0.000000 |
| 96  | 6 | 0 | 17.663606  | 13.344291 | 0.000000 |
| 97  | 6 | 0 | 14.895747  | 13.337869 | 0.000000 |
| 98  | 6 | 0 | 13.337869  | 14.895747 | 0.000000 |
| 99  | 6 | 0 | 13.344291  | 17.663606 | 0.000000 |
| 100 | 6 | 0 | 14.904228  | 19.228018 | 0.000000 |
| 101 | 6 | 0 | 17.991050  | 15.574151 | 0.000000 |
| 102 | 6 | 0 | 17.987316  | 16.974143 | 0.000000 |
| 103 | 6 | 0 | 16.974143  | 17.987316 | 0.000000 |
| 104 | 6 | 0 | 15.574151  | 17.991050 | 0.000000 |
| 105 | 6 | 0 | 14.554819  | 16.986495 | 0.000000 |
| 106 | 6 | 0 | 14.554190  | 15.565340 | 0.000000 |
| 107 | 6 | 0 | 15.565340  | 14.554190 | 0.000000 |
| 108 | 6 | 0 | 16.986495  | 14.554819 | 0.000000 |
| 109 | 6 | 0 | 19.218239  | 17.651920 | 0.000000 |
| 110 | 6 | 0 | 17.651920  | 19.218239 | 0.000000 |
| 111 | 6 | 0 | 20.449666  | 16.982211 | 0.000000 |
| 112 | 6 | 0 | 20.454856  | 15.579342 | 0.000000 |
| 113 | 6 | 0 | 12.070210  | 17.011897 | 0.000000 |
| 114 | 6 | 0 | 12.068367  | 15.551427 | 0.000000 |
| 115 | 6 | 0 | 15.579342  | 20.454856 | 0.000000 |
| 116 | 6 | 0 | 16.982211  | 20.449666 | 0.000000 |
| 117 | 6 | 0 | 15.551427  | 12.068367 | 0.000000 |
| 118 | 6 | 0 | 17.011897  | 12.070210 | 0.000000 |
| 119 | 8 | 0 | 19.034148  | 13.527340 | 0.000000 |
| 120 | 8 | 0 | 19.027378  | 19.027378 | 0.000000 |
| 121 | 8 | 0 | 13.524356  | 13.524356 | 0.000000 |
| 122 | 1 | 0 | 21.382244  | 17.538534 | 0.000000 |
| 123 | 1 | 0 | 21.391278  | 15.029317 | 0.000000 |
| 124 | 1 | 0 | 15.029317  | 21.391278 | 0.000000 |
| 125 | 1 | 0 | 17.538534  | 21.382244 | 0.000000 |
| 126 | 6 | 0 | 10.849214  | 14.867177 | 0.000000 |
| 127 | 6 | 0 | 17.700159  | 10.852017 | 0.000000 |
| 128 | 6 | 0 | 10.856938  | 6.842462  | 0.000000 |
| 129 | 6 | 0 | 10.855673  | 4.009279  | 0.000000 |
| 130 | 1 | 0 | 2.922402   | 10.854350 | 0.000000 |
| 131 | 1 | 0 | 7.929342   | 10.858267 | 0.000000 |
| 132 | 1 | 0 | 13.780165  | 10.847174 | 0.000000 |
| 133 | 1 | 0 | 10.854587  | 18.786746 | 0.000000 |
| 134 | 1 | 0 | 10.847174  | 13.780165 | 0.000000 |
| 135 | 1 | 0 | 18.786746  | 10.854587 | 0.000000 |
| 136 | 1 | 0 | 10.858267  | 7.929342  | 0.000000 |
| 137 | 1 | 0 | 10.854350  | 2.922402  | 0.000000 |
| 138 | 6 | 0 | -17.700159 | 10.852017 | 0.000000 |
| 139 | 8 | 0 | -19.039547 | 8.174606  | 0.000000 |
| 140 | 6 | 0 | -13.346475 | 4.043877  | 0.000000 |
| 141 | 6 | 0 | -14.905693 | 2.487393  | 0.000000 |
| 142 | 6 | 0 | -17.671544 | 2.494419  | 0.000000 |
| 143 | 6 | 0 | -19.236016 | 4.055208  | 0.000000 |
| 144 | 6 | 0 | -19.234714 | 6.798794  | 0.000000 |
| 145 | 6 | 0 | -17.668699 | 8.357898  | 0.000000 |
| 146 | 6 | 0 | -14.563124 | 4.713993  | 0.000000 |
| 147 | 6 | 0 | -14.562891 | 6.135581  | 0.000000 |
| 148 | 6 | 0 | -15.573166 | 7.146165  | 0.000000 |

|     |   |   |            |           |          |
|-----|---|---|------------|-----------|----------|
| 149 | 6 | 0 | -16.993650 | 7.145805  | 0.000000 |
| 150 | 6 | 0 | -17.998664 | 6.127118  | 0.000000 |
| 151 | 6 | 0 | -17.999238 | 4.725464  | 0.000000 |
| 152 | 6 | 0 | -16.995086 | 3.705838  | 0.000000 |
| 153 | 6 | 0 | -15.574352 | 3.704232  | 0.000000 |
| 154 | 6 | 0 | -13.346062 | 6.805109  | 0.000000 |
| 155 | 6 | 0 | -14.903550 | 8.362473  | 0.000000 |
| 156 | 6 | 0 | -12.074555 | 6.154452  | 0.000000 |
| 157 | 6 | 0 | -12.074524 | 4.694906  | 0.000000 |
| 158 | 6 | 0 | -20.465132 | 6.128757  | 0.000000 |
| 159 | 6 | 0 | -20.465809 | 4.726421  | 0.000000 |
| 160 | 6 | 0 | -17.015903 | 9.631303  | 0.000000 |
| 161 | 6 | 0 | -15.556005 | 9.631977  | 0.000000 |
| 162 | 6 | 0 | -17.020419 | 1.219933  | 0.000000 |
| 163 | 6 | 0 | -15.560017 | 1.218268  | 0.000000 |
| 164 | 8 | 0 | -13.534162 | 2.673766  | 0.000000 |
| 165 | 8 | 0 | -13.532481 | 8.175240  | 0.000000 |
| 166 | 8 | 0 | -19.042407 | 2.679089  | 0.000000 |
| 167 | 1 | 0 | -21.398940 | 6.683070  | 0.000000 |
| 168 | 1 | 0 | -21.400129 | 4.172901  | 0.000000 |
| 169 | 6 | 0 | -17.706589 | 0.000000  | 0.000000 |
| 170 | 6 | 0 | -14.873656 | 0.000000  | 0.000000 |
| 171 | 6 | 0 | -14.867177 | 10.849214 | 0.000000 |
| 172 | 8 | 0 | -8.178746  | 8.178746  | 0.000000 |
| 173 | 6 | 0 | -2.489608  | 4.047184  | 0.000000 |
| 174 | 6 | 0 | -4.047184  | 2.489608  | 0.000000 |
| 175 | 6 | 0 | -6.808087  | 2.489586  | 0.000000 |
| 176 | 6 | 0 | -8.366000  | 4.047073  | 0.000000 |
| 177 | 6 | 0 | -8.366391  | 6.808315  | 0.000000 |
| 178 | 6 | 0 | -6.808315  | 8.366391  | 0.000000 |
| 179 | 6 | 0 | -3.706481  | 4.716863  | 0.000000 |
| 180 | 6 | 0 | -3.706593  | 6.138676  | 0.000000 |
| 181 | 6 | 0 | -4.716947  | 7.149149  | 0.000000 |
| 182 | 6 | 0 | -6.138837  | 7.149298  | 0.000000 |
| 183 | 6 | 0 | -7.149298  | 6.138837  | 0.000000 |
| 184 | 6 | 0 | -7.149149  | 4.716947  | 0.000000 |
| 185 | 6 | 0 | -6.138676  | 3.706593  | 0.000000 |
| 186 | 6 | 0 | -4.716863  | 3.706481  | 0.000000 |
| 187 | 6 | 0 | -2.489586  | 6.808087  | 0.000000 |
| 188 | 6 | 0 | -4.047073  | 8.366000  | 0.000000 |
| 189 | 6 | 0 | -1.218109  | 6.157311  | 0.000000 |
| 190 | 6 | 0 | -9.637989  | 6.156841  | 0.000000 |
| 191 | 6 | 0 | -9.637800  | 4.697281  | 0.000000 |
| 192 | 6 | 0 | -6.156841  | 9.637989  | 0.000000 |
| 193 | 6 | 0 | -4.697281  | 9.637800  | 0.000000 |
| 194 | 6 | 0 | -6.157311  | 1.218109  | 0.000000 |
| 195 | 6 | 0 | -4.697795  | 1.218070  | 0.000000 |
| 196 | 8 | 0 | -2.677034  | 2.677034  | 0.000000 |
| 197 | 8 | 0 | -2.676790  | 8.178415  | 0.000000 |
| 198 | 8 | 0 | -8.178415  | 2.676790  | 0.000000 |
| 199 | 6 | 0 | -6.842462  | 10.856938 | 0.000000 |
| 200 | 8 | 0 | -19.027378 | 19.027378 | 0.000000 |
| 201 | 6 | 0 | -13.337869 | 14.895747 | 0.000000 |
| 202 | 6 | 0 | -14.895747 | 13.337869 | 0.000000 |
| 203 | 6 | 0 | -17.663606 | 13.344291 | 0.000000 |
| 204 | 6 | 0 | -19.228018 | 14.904228 | 0.000000 |
| 205 | 6 | 0 | -19.218239 | 17.651920 | 0.000000 |
| 206 | 6 | 0 | -17.651920 | 19.218239 | 0.000000 |
| 207 | 6 | 0 | -14.554190 | 15.565340 | 0.000000 |
| 208 | 6 | 0 | -14.554819 | 16.986495 | 0.000000 |
| 209 | 6 | 0 | -15.574151 | 17.991050 | 0.000000 |
| 210 | 6 | 0 | -16.974143 | 17.987316 | 0.000000 |
| 211 | 6 | 0 | -17.987316 | 16.974143 | 0.000000 |
| 212 | 6 | 0 | -17.991050 | 15.574151 | 0.000000 |
| 213 | 6 | 0 | -16.986495 | 14.554819 | 0.000000 |
| 214 | 6 | 0 | -15.565340 | 14.554190 | 0.000000 |
| 215 | 6 | 0 | -13.344291 | 17.663606 | 0.000000 |
| 216 | 6 | 0 | -14.904228 | 19.228018 | 0.000000 |
| 217 | 6 | 0 | -12.070210 | 17.011897 | 0.000000 |
| 218 | 6 | 0 | -12.068367 | 15.551427 | 0.000000 |
| 219 | 6 | 0 | -20.449666 | 16.982211 | 0.000000 |
| 220 | 6 | 0 | -20.454856 | 15.579342 | 0.000000 |
| 221 | 6 | 0 | -16.982211 | 20.449666 | 0.000000 |
| 222 | 6 | 0 | -15.579342 | 20.454856 | 0.000000 |
| 223 | 6 | 0 | -17.011897 | 12.070210 | 0.000000 |
| 224 | 6 | 0 | -15.551427 | 12.068367 | 0.000000 |
| 225 | 8 | 0 | -13.524356 | 13.524356 | 0.000000 |
| 226 | 8 | 0 | -13.527340 | 19.034148 | 0.000000 |
| 227 | 8 | 0 | -19.034148 | 13.527340 | 0.000000 |

|     |   |   |            |            |          |
|-----|---|---|------------|------------|----------|
| 228 | 1 | 0 | -21.382244 | 17.538534  | 0.000000 |
| 229 | 1 | 0 | -21.391278 | 15.029317  | 0.000000 |
| 230 | 1 | 0 | -17.538534 | 21.382244  | 0.000000 |
| 231 | 1 | 0 | -15.029317 | 21.391278  | 0.000000 |
| 232 | 6 | 0 | -10.852017 | 17.700159  | 0.000000 |
| 233 | 8 | 0 | -8.174606  | 19.039547  | 0.000000 |
| 234 | 6 | 0 | -2.487393  | 14.905693  | 0.000000 |
| 235 | 6 | 0 | -4.043877  | 13.346475  | 0.000000 |
| 236 | 6 | 0 | -6.805109  | 13.346062  | 0.000000 |
| 237 | 6 | 0 | -8.362473  | 14.903550  | 0.000000 |
| 238 | 6 | 0 | -8.357898  | 17.668699  | 0.000000 |
| 239 | 6 | 0 | -6.798794  | 19.234714  | 0.000000 |
| 240 | 6 | 0 | -3.704232  | 15.574352  | 0.000000 |
| 241 | 6 | 0 | -3.705838  | 16.995086  | 0.000000 |
| 242 | 6 | 0 | -4.725464  | 17.999238  | 0.000000 |
| 243 | 6 | 0 | -6.127118  | 17.998664  | 0.000000 |
| 244 | 6 | 0 | -7.145805  | 16.993650  | 0.000000 |
| 245 | 6 | 0 | -7.146165  | 15.573166  | 0.000000 |
| 246 | 6 | 0 | -6.135581  | 14.562891  | 0.000000 |
| 247 | 6 | 0 | -4.713993  | 14.563124  | 0.000000 |
| 248 | 6 | 0 | -2.494419  | 17.671544  | 0.000000 |
| 249 | 6 | 0 | -4.055208  | 19.236016  | 0.000000 |
| 250 | 6 | 0 | -1.219933  | 17.020419  | 0.000000 |
| 251 | 6 | 0 | -1.218268  | 15.560017  | 0.000000 |
| 252 | 6 | 0 | -9.631303  | 17.015903  | 0.000000 |
| 253 | 6 | 0 | -9.631977  | 15.556005  | 0.000000 |
| 254 | 6 | 0 | -6.128757  | 20.465132  | 0.000000 |
| 255 | 6 | 0 | -4.726421  | 20.465809  | 0.000000 |
| 256 | 6 | 0 | -6.154452  | 12.074555  | 0.000000 |
| 257 | 6 | 0 | -4.694906  | 12.074524  | 0.000000 |
| 258 | 8 | 0 | -2.673766  | 13.534162  | 0.000000 |
| 259 | 8 | 0 | -2.679089  | 19.042407  | 0.000000 |
| 260 | 8 | 0 | -8.175240  | 13.532481  | 0.000000 |
| 261 | 6 | 0 | 0.000000   | 17.706589  | 0.000000 |
| 262 | 6 | 0 | 0.000000   | 14.873656  | 0.000000 |
| 263 | 1 | 0 | -6.683070  | 21.398940  | 0.000000 |
| 264 | 1 | 0 | -4.172901  | 21.400129  | 0.000000 |
| 265 | 6 | 0 | -10.849214 | 14.867177  | 0.000000 |
| 266 | 6 | 0 | -4.009279  | 10.855673  | 0.000000 |
| 267 | 6 | 0 | -10.856938 | 6.842462   | 0.000000 |
| 268 | 6 | 0 | -10.855673 | 4.009279   | 0.000000 |
| 269 | 1 | 0 | -18.786746 | 10.854587  | 0.000000 |
| 270 | 1 | 0 | -13.780165 | 10.847174  | 0.000000 |
| 271 | 1 | 0 | -7.929342  | 10.858267  | 0.000000 |
| 272 | 1 | 0 | -10.854587 | 18.786746  | 0.000000 |
| 273 | 1 | 0 | -10.847174 | 13.780165  | 0.000000 |
| 274 | 1 | 0 | -2.922402  | 10.854350  | 0.000000 |
| 275 | 1 | 0 | -10.858267 | 7.929342   | 0.000000 |
| 276 | 1 | 0 | -10.854350 | 2.922402   | 0.000000 |
| 277 | 6 | 0 | -1.218070  | 4.697795   | 0.000000 |
| 278 | 6 | 0 | 0.000000   | 6.844311   | 0.000000 |
| 279 | 1 | 0 | 0.000000   | 2.924167   | 0.000000 |
| 280 | 1 | 0 | 0.000000   | 18.793364  | 0.000000 |
| 281 | 1 | 0 | 0.000000   | 13.786564  | 0.000000 |
| 282 | 1 | 0 | 0.000000   | 7.931207   | 0.000000 |
| 283 | 6 | 0 | -6.844311  | 0.000000   | 0.000000 |
| 284 | 6 | 0 | 0.000000   | -17.706589 | 0.000000 |
| 285 | 6 | 0 | 4.009279   | -10.855673 | 0.000000 |
| 286 | 8 | 0 | 2.673766   | -13.534162 | 0.000000 |
| 287 | 6 | 0 | 8.357898   | -17.668699 | 0.000000 |
| 288 | 6 | 0 | 6.798794   | -19.234714 | 0.000000 |
| 289 | 6 | 0 | 4.055208   | -19.236016 | 0.000000 |
| 290 | 6 | 0 | 2.494419   | -17.671544 | 0.000000 |
| 291 | 6 | 0 | 2.487393   | -14.905693 | 0.000000 |
| 292 | 6 | 0 | 4.043877   | -13.346475 | 0.000000 |
| 293 | 6 | 0 | 7.145805   | -16.993650 | 0.000000 |
| 294 | 6 | 0 | 7.146165   | -15.573166 | 0.000000 |
| 295 | 6 | 0 | 6.135581   | -14.562891 | 0.000000 |
| 296 | 6 | 0 | 4.713993   | -14.563124 | 0.000000 |
| 297 | 6 | 0 | 3.704232   | -15.574352 | 0.000000 |
| 298 | 6 | 0 | 3.705838   | -16.995086 | 0.000000 |
| 299 | 6 | 0 | 4.725464   | -17.999238 | 0.000000 |
| 300 | 6 | 0 | 6.127118   | -17.998664 | 0.000000 |
| 301 | 6 | 0 | 8.362473   | -14.903550 | 0.000000 |
| 302 | 6 | 0 | 6.805109   | -13.346062 | 0.000000 |
| 303 | 6 | 0 | 9.631977   | -15.556005 | 0.000000 |
| 304 | 6 | 0 | 9.631303   | -17.015903 | 0.000000 |
| 305 | 6 | 0 | 1.218268   | -15.560017 | 0.000000 |
| 306 | 6 | 0 | 1.219933   | -17.020419 | 0.000000 |

|     |   |   |           |            |          |
|-----|---|---|-----------|------------|----------|
| 307 | 6 | 0 | 4.694906  | -12.074524 | 0.000000 |
| 308 | 6 | 0 | 6.154452  | -12.074555 | 0.000000 |
| 309 | 6 | 0 | 4.726421  | -20.465809 | 0.000000 |
| 310 | 6 | 0 | 6.128757  | -20.465132 | 0.000000 |
| 311 | 8 | 0 | 8.174606  | -19.039547 | 0.000000 |
| 312 | 8 | 0 | 8.175240  | -13.532481 | 0.000000 |
| 313 | 8 | 0 | 2.679089  | -19.042407 | 0.000000 |
| 314 | 1 | 0 | 4.172901  | -21.400129 | 0.000000 |
| 315 | 1 | 0 | 6.683070  | -21.398940 | 0.000000 |
| 316 | 6 | 0 | 6.842462  | -10.856938 | 0.000000 |
| 317 | 8 | 0 | 13.524356 | -13.524356 | 0.000000 |
| 318 | 6 | 0 | 19.218239 | -17.651920 | 0.000000 |
| 319 | 6 | 0 | 17.651920 | -19.218239 | 0.000000 |
| 320 | 6 | 0 | 14.904228 | -19.228018 | 0.000000 |
| 321 | 6 | 0 | 13.344291 | -17.663606 | 0.000000 |
| 322 | 6 | 0 | 13.337869 | -14.895747 | 0.000000 |
| 323 | 6 | 0 | 14.895747 | -13.337869 | 0.000000 |
| 324 | 6 | 0 | 17.987316 | -16.974143 | 0.000000 |
| 325 | 6 | 0 | 17.991050 | -15.574151 | 0.000000 |
| 326 | 6 | 0 | 16.986495 | -14.554819 | 0.000000 |
| 327 | 6 | 0 | 15.565340 | -14.554190 | 0.000000 |
| 328 | 6 | 0 | 14.554190 | -15.565340 | 0.000000 |
| 329 | 6 | 0 | 14.554819 | -16.986495 | 0.000000 |
| 330 | 6 | 0 | 15.574151 | -17.991050 | 0.000000 |
| 331 | 6 | 0 | 16.974143 | -17.987316 | 0.000000 |
| 332 | 6 | 0 | 19.228018 | -14.904228 | 0.000000 |
| 333 | 6 | 0 | 17.663606 | -13.344291 | 0.000000 |
| 334 | 6 | 0 | 20.454856 | -15.579342 | 0.000000 |
| 335 | 6 | 0 | 20.449666 | -16.982211 | 0.000000 |
| 336 | 6 | 0 | 12.068367 | -15.551427 | 0.000000 |
| 337 | 6 | 0 | 12.070210 | -17.011897 | 0.000000 |
| 338 | 6 | 0 | 15.551427 | -12.068367 | 0.000000 |
| 339 | 6 | 0 | 17.011897 | -12.070210 | 0.000000 |
| 340 | 6 | 0 | 15.579342 | -20.454856 | 0.000000 |
| 341 | 6 | 0 | 16.982211 | -20.449666 | 0.000000 |
| 342 | 8 | 0 | 19.027378 | -19.027378 | 0.000000 |
| 343 | 8 | 0 | 19.034148 | -13.527340 | 0.000000 |
| 344 | 8 | 0 | 13.527340 | -19.034148 | 0.000000 |
| 345 | 1 | 0 | 21.391278 | -15.029317 | 0.000000 |
| 346 | 1 | 0 | 21.382244 | -17.538534 | 0.000000 |
| 347 | 1 | 0 | 15.029317 | -21.391278 | 0.000000 |
| 348 | 1 | 0 | 17.538534 | -21.382244 | 0.000000 |
| 349 | 6 | 0 | 14.867177 | -10.849214 | 0.000000 |
| 350 | 8 | 0 | 2.677034  | -2.677034  | 0.000000 |
| 351 | 6 | 0 | 8.366391  | -6.808315  | 0.000000 |
| 352 | 6 | 0 | 6.808315  | -8.366391  | 0.000000 |
| 353 | 6 | 0 | 4.047073  | -8.366000  | 0.000000 |
| 354 | 6 | 0 | 2.489586  | -6.808087  | 0.000000 |
| 355 | 6 | 0 | 2.489608  | -4.047184  | 0.000000 |
| 356 | 6 | 0 | 4.047184  | -2.489608  | 0.000000 |
| 357 | 6 | 0 | 7.149298  | -6.138837  | 0.000000 |
| 358 | 6 | 0 | 7.149149  | -4.716947  | 0.000000 |
| 359 | 6 | 0 | 6.138676  | -3.706593  | 0.000000 |
| 360 | 6 | 0 | 4.716863  | -3.706481  | 0.000000 |
| 361 | 6 | 0 | 3.706481  | -4.716863  | 0.000000 |
| 362 | 6 | 0 | 3.706593  | -6.138676  | 0.000000 |
| 363 | 6 | 0 | 4.716947  | -7.149149  | 0.000000 |
| 364 | 6 | 0 | 6.138837  | -7.149298  | 0.000000 |
| 365 | 6 | 0 | 8.366000  | -4.047073  | 0.000000 |
| 366 | 6 | 0 | 6.808087  | -2.489586  | 0.000000 |
| 367 | 6 | 0 | 9.637800  | -4.697281  | 0.000000 |
| 368 | 6 | 0 | 9.637989  | -6.156841  | 0.000000 |
| 369 | 6 | 0 | 1.218070  | -4.697795  | 0.000000 |
| 370 | 6 | 0 | 1.218109  | -6.157311  | 0.000000 |
| 371 | 6 | 0 | 4.697795  | -1.218070  | 0.000000 |
| 372 | 6 | 0 | 6.157311  | -1.218109  | 0.000000 |
| 373 | 6 | 0 | 4.697281  | -9.637800  | 0.000000 |
| 374 | 6 | 0 | 6.156841  | -9.637989  | 0.000000 |
| 375 | 8 | 0 | 8.178746  | -8.178746  | 0.000000 |
| 376 | 8 | 0 | 8.178415  | -2.676790  | 0.000000 |
| 377 | 8 | 0 | 2.676790  | -8.178415  | 0.000000 |
| 378 | 6 | 0 | 10.855673 | -4.009279  | 0.000000 |
| 379 | 8 | 0 | 13.534162 | -2.673766  | 0.000000 |
| 380 | 6 | 0 | 19.234714 | -6.798794  | 0.000000 |
| 381 | 6 | 0 | 17.668699 | -8.357898  | 0.000000 |
| 382 | 6 | 0 | 14.903550 | -8.362473  | 0.000000 |
| 383 | 6 | 0 | 13.346062 | -6.805109  | 0.000000 |
| 384 | 6 | 0 | 13.346475 | -4.043877  | 0.000000 |
| 385 | 6 | 0 | 14.905693 | -2.487393  | 0.000000 |

|     |   |   |            |            |          |
|-----|---|---|------------|------------|----------|
| 386 | 6 | 0 | 17.998664  | -6.127118  | 0.000000 |
| 387 | 6 | 0 | 17.999238  | -4.725464  | 0.000000 |
| 388 | 6 | 0 | 16.995086  | -3.705838  | 0.000000 |
| 389 | 6 | 0 | 15.574352  | -3.704232  | 0.000000 |
| 390 | 6 | 0 | 14.563124  | -4.713993  | 0.000000 |
| 391 | 6 | 0 | 14.562891  | -6.135581  | 0.000000 |
| 392 | 6 | 0 | 15.573166  | -7.146165  | 0.000000 |
| 393 | 6 | 0 | 16.993650  | -7.145805  | 0.000000 |
| 394 | 6 | 0 | 19.236016  | -4.055208  | 0.000000 |
| 395 | 6 | 0 | 17.671544  | -2.494419  | 0.000000 |
| 396 | 6 | 0 | 20.465809  | -4.726421  | 0.000000 |
| 397 | 6 | 0 | 20.465132  | -6.128757  | 0.000000 |
| 398 | 6 | 0 | 12.074524  | -4.694906  | 0.000000 |
| 399 | 6 | 0 | 12.074555  | -6.154452  | 0.000000 |
| 400 | 6 | 0 | 15.560017  | -1.218268  | 0.000000 |
| 401 | 6 | 0 | 17.020419  | -1.219933  | 0.000000 |
| 402 | 6 | 0 | 15.556005  | -9.631977  | 0.000000 |
| 403 | 6 | 0 | 17.015903  | -9.631303  | 0.000000 |
| 404 | 8 | 0 | 19.039547  | -8.174606  | 0.000000 |
| 405 | 8 | 0 | 19.042407  | -2.679089  | 0.000000 |
| 406 | 8 | 0 | 13.532481  | -8.175240  | 0.000000 |
| 407 | 1 | 0 | 21.400129  | -4.172901  | 0.000000 |
| 408 | 1 | 0 | 21.398940  | -6.683070  | 0.000000 |
| 409 | 6 | 0 | 10.856938  | -6.842462  | 0.000000 |
| 410 | 6 | 0 | 17.700159  | -10.852017 | 0.000000 |
| 411 | 6 | 0 | 10.849214  | -14.867177 | 0.000000 |
| 412 | 6 | 0 | 10.852017  | -17.700159 | 0.000000 |
| 413 | 1 | 0 | 2.922402   | -10.854350 | 0.000000 |
| 414 | 1 | 0 | 7.929342   | -10.858267 | 0.000000 |
| 415 | 1 | 0 | 13.780165  | -10.847174 | 0.000000 |
| 416 | 1 | 0 | 10.854350  | -2.922402  | 0.000000 |
| 417 | 1 | 0 | 10.858267  | -7.929342  | 0.000000 |
| 418 | 1 | 0 | 18.786746  | -10.854587 | 0.000000 |
| 419 | 1 | 0 | 10.847174  | -13.780165 | 0.000000 |
| 420 | 1 | 0 | 10.854587  | -18.786746 | 0.000000 |
| 421 | 6 | 0 | -17.700159 | -10.852017 | 0.000000 |
| 422 | 8 | 0 | -19.034148 | -13.527340 | 0.000000 |
| 423 | 6 | 0 | -13.344291 | -17.663606 | 0.000000 |
| 424 | 6 | 0 | -14.904228 | -19.228018 | 0.000000 |
| 425 | 6 | 0 | -17.651920 | -19.218239 | 0.000000 |
| 426 | 6 | 0 | -19.218239 | -17.651920 | 0.000000 |
| 427 | 6 | 0 | -19.228018 | -14.904228 | 0.000000 |
| 428 | 6 | 0 | -17.663606 | -13.344291 | 0.000000 |
| 429 | 6 | 0 | -14.554819 | -16.986495 | 0.000000 |
| 430 | 6 | 0 | -14.554190 | -15.565340 | 0.000000 |
| 431 | 6 | 0 | -15.565340 | -14.554190 | 0.000000 |
| 432 | 6 | 0 | -16.986495 | -14.554819 | 0.000000 |
| 433 | 6 | 0 | -17.991050 | -15.574151 | 0.000000 |
| 434 | 6 | 0 | -17.987316 | -16.974143 | 0.000000 |
| 435 | 6 | 0 | -16.974143 | -17.987316 | 0.000000 |
| 436 | 6 | 0 | -15.574151 | -17.991050 | 0.000000 |
| 437 | 6 | 0 | -13.337869 | -14.895747 | 0.000000 |
| 438 | 6 | 0 | -14.895747 | -13.337869 | 0.000000 |
| 439 | 6 | 0 | -12.068367 | -15.551427 | 0.000000 |
| 440 | 6 | 0 | -12.070210 | -17.011897 | 0.000000 |
| 441 | 6 | 0 | -20.454856 | -15.579342 | 0.000000 |
| 442 | 6 | 0 | -20.449666 | -16.982211 | 0.000000 |
| 443 | 6 | 0 | -17.011897 | -12.070210 | 0.000000 |
| 444 | 6 | 0 | -15.551427 | -12.068367 | 0.000000 |
| 445 | 6 | 0 | -16.982211 | -20.449666 | 0.000000 |
| 446 | 6 | 0 | -15.579342 | -20.454856 | 0.000000 |
| 447 | 8 | 0 | -13.527340 | -19.034148 | 0.000000 |
| 448 | 8 | 0 | -13.524356 | -13.524356 | 0.000000 |
| 449 | 8 | 0 | -19.027378 | -19.027378 | 0.000000 |
| 450 | 1 | 0 | -21.391278 | -15.029317 | 0.000000 |
| 451 | 1 | 0 | -21.382244 | -17.538534 | 0.000000 |
| 452 | 1 | 0 | -17.538534 | -21.382244 | 0.000000 |
| 453 | 1 | 0 | -15.029317 | -21.391278 | 0.000000 |
| 454 | 6 | 0 | -14.867177 | -10.849214 | 0.000000 |
| 455 | 8 | 0 | -8.175240  | -13.532481 | 0.000000 |
| 456 | 6 | 0 | -2.494419  | -17.671544 | 0.000000 |
| 457 | 6 | 0 | -4.055208  | -19.236016 | 0.000000 |
| 458 | 6 | 0 | -6.798794  | -19.234714 | 0.000000 |
| 459 | 6 | 0 | -8.357898  | -17.668699 | 0.000000 |
| 460 | 6 | 0 | -8.362473  | -14.903550 | 0.000000 |
| 461 | 6 | 0 | -6.805109  | -13.346062 | 0.000000 |
| 462 | 6 | 0 | -3.705838  | -16.995086 | 0.000000 |
| 463 | 6 | 0 | -3.704232  | -15.574352 | 0.000000 |
| 464 | 6 | 0 | -4.713993  | -14.563124 | 0.000000 |

|     |   |   |            |            |          |
|-----|---|---|------------|------------|----------|
| 465 | 6 | 0 | -6.135581  | -14.562891 | 0.000000 |
| 466 | 6 | 0 | -7.146165  | -15.573166 | 0.000000 |
| 467 | 6 | 0 | -7.145805  | -16.993650 | 0.000000 |
| 468 | 6 | 0 | -6.127118  | -17.998664 | 0.000000 |
| 469 | 6 | 0 | -4.725464  | -17.999238 | 0.000000 |
| 470 | 6 | 0 | -2.487393  | -14.905693 | 0.000000 |
| 471 | 6 | 0 | -4.043877  | -13.346475 | 0.000000 |
| 472 | 6 | 0 | -1.218268  | -15.560017 | 0.000000 |
| 473 | 6 | 0 | -9.631977  | -15.556005 | 0.000000 |
| 474 | 6 | 0 | -9.631303  | -17.015903 | 0.000000 |
| 475 | 6 | 0 | -6.154452  | -12.074555 | 0.000000 |
| 476 | 6 | 0 | -4.694906  | -12.074524 | 0.000000 |
| 477 | 6 | 0 | -6.128757  | -20.465132 | 0.000000 |
| 478 | 6 | 0 | -4.726421  | -20.465809 | 0.000000 |
| 479 | 8 | 0 | -2.679089  | -19.042407 | 0.000000 |
| 480 | 8 | 0 | -2.673766  | -13.534162 | 0.000000 |
| 481 | 8 | 0 | -8.174606  | -19.039547 | 0.000000 |
| 482 | 1 | 0 | -6.683070  | -21.398940 | 0.000000 |
| 483 | 1 | 0 | -4.172901  | -21.400129 | 0.000000 |
| 484 | 6 | 0 | -6.842462  | -10.856938 | 0.000000 |
| 485 | 8 | 0 | -19.042407 | -2.679089  | 0.000000 |
| 486 | 6 | 0 | -13.346062 | -6.805109  | 0.000000 |
| 487 | 6 | 0 | -14.903550 | -8.362473  | 0.000000 |
| 488 | 6 | 0 | -17.668699 | -8.357898  | 0.000000 |
| 489 | 6 | 0 | -19.234714 | -6.798794  | 0.000000 |
| 490 | 6 | 0 | -19.236016 | -4.055208  | 0.000000 |
| 491 | 6 | 0 | -17.671544 | -2.494419  | 0.000000 |
| 492 | 6 | 0 | -14.562891 | -6.135581  | 0.000000 |
| 493 | 6 | 0 | -14.563124 | -4.713993  | 0.000000 |
| 494 | 6 | 0 | -15.574352 | -3.704232  | 0.000000 |
| 495 | 6 | 0 | -16.995086 | -3.705838  | 0.000000 |
| 496 | 6 | 0 | -17.999238 | -4.725464  | 0.000000 |
| 497 | 6 | 0 | -17.998664 | -6.127118  | 0.000000 |
| 498 | 6 | 0 | -16.993650 | -7.145805  | 0.000000 |
| 499 | 6 | 0 | -15.573166 | -7.146165  | 0.000000 |
| 500 | 6 | 0 | -13.346475 | -4.043877  | 0.000000 |
| 501 | 6 | 0 | -14.905693 | -2.487393  | 0.000000 |
| 502 | 6 | 0 | -12.074524 | -4.694906  | 0.000000 |
| 503 | 6 | 0 | -12.074555 | -6.154452  | 0.000000 |
| 504 | 6 | 0 | -20.465809 | -4.726421  | 0.000000 |
| 505 | 6 | 0 | -20.465132 | -6.128757  | 0.000000 |
| 506 | 6 | 0 | -17.020419 | -1.219933  | 0.000000 |
| 507 | 6 | 0 | -15.560017 | -1.218268  | 0.000000 |
| 508 | 6 | 0 | -17.015903 | -9.631303  | 0.000000 |
| 509 | 6 | 0 | -15.556005 | -9.631977  | 0.000000 |
| 510 | 8 | 0 | -13.532481 | -8.175240  | 0.000000 |
| 511 | 8 | 0 | -13.534162 | -2.673766  | 0.000000 |
| 512 | 8 | 0 | -19.039547 | -8.174606  | 0.000000 |
| 513 | 1 | 0 | -21.400129 | -4.172901  | 0.000000 |
| 514 | 1 | 0 | -21.398940 | -6.683070  | 0.000000 |
| 515 | 6 | 0 | -10.855673 | -4.009279  | 0.000000 |
| 516 | 8 | 0 | -8.178415  | -2.676790  | 0.000000 |
| 517 | 6 | 0 | -2.489586  | -6.808087  | 0.000000 |
| 518 | 6 | 0 | -4.047073  | -8.366000  | 0.000000 |
| 519 | 6 | 0 | -6.808315  | -8.366391  | 0.000000 |
| 520 | 6 | 0 | -8.366391  | -6.808315  | 0.000000 |
| 521 | 6 | 0 | -8.366000  | -4.047073  | 0.000000 |
| 522 | 6 | 0 | -6.808087  | -2.489586  | 0.000000 |
| 523 | 6 | 0 | -3.706593  | -6.138676  | 0.000000 |
| 524 | 6 | 0 | -3.706481  | -4.716863  | 0.000000 |
| 525 | 6 | 0 | -4.716863  | -3.706481  | 0.000000 |
| 526 | 6 | 0 | -6.138676  | -3.706593  | 0.000000 |
| 527 | 6 | 0 | -7.149149  | -4.716947  | 0.000000 |
| 528 | 6 | 0 | -7.149298  | -6.138837  | 0.000000 |
| 529 | 6 | 0 | -6.138837  | -7.149298  | 0.000000 |
| 530 | 6 | 0 | -4.716947  | -7.149149  | 0.000000 |
| 531 | 6 | 0 | -2.489608  | -4.047184  | 0.000000 |
| 532 | 6 | 0 | -4.047184  | -2.489608  | 0.000000 |
| 533 | 6 | 0 | -1.218070  | -4.697795  | 0.000000 |
| 534 | 6 | 0 | -1.218109  | -6.157311  | 0.000000 |
| 535 | 6 | 0 | -9.637800  | -4.697281  | 0.000000 |
| 536 | 6 | 0 | -9.637989  | -6.156841  | 0.000000 |
| 537 | 6 | 0 | -6.157311  | -1.218109  | 0.000000 |
| 538 | 6 | 0 | -4.697795  | -1.218070  | 0.000000 |
| 539 | 6 | 0 | -6.156841  | -9.637989  | 0.000000 |
| 540 | 6 | 0 | -4.697281  | -9.637800  | 0.000000 |
| 541 | 8 | 0 | -2.676790  | -8.178415  | 0.000000 |
| 542 | 8 | 0 | -2.677034  | -2.677034  | 0.000000 |
| 543 | 8 | 0 | -8.178746  | -8.178746  | 0.000000 |



|     |   |   |            |            |          |
|-----|---|---|------------|------------|----------|
| 544 | 6 | 0 | 0.000000   | -4.010847  | 0.000000 |
| 545 | 6 | 0 | 0.000000   | -6.844311  | 0.000000 |
| 546 | 6 | 0 | -10.856938 | -6.842462  | 0.000000 |
| 547 | 6 | 0 | -4.009279  | -10.855673 | 0.000000 |
| 548 | 6 | 0 | -10.849214 | -14.867177 | 0.000000 |
| 549 | 6 | 0 | -10.852017 | -17.700159 | 0.000000 |
| 550 | 1 | 0 | -18.786746 | -10.854587 | 0.000000 |
| 551 | 1 | 0 | -13.780165 | -10.847174 | 0.000000 |
| 552 | 1 | 0 | -7.929342  | -10.858267 | 0.000000 |
| 553 | 1 | 0 | -10.854350 | -2.922402  | 0.000000 |
| 554 | 1 | 0 | -10.858267 | -7.929342  | 0.000000 |
| 555 | 1 | 0 | -2.922402  | -10.854350 | 0.000000 |
| 556 | 1 | 0 | -10.847174 | -13.780165 | 0.000000 |
| 557 | 1 | 0 | -10.854587 | -18.786746 | 0.000000 |
| 558 | 6 | 0 | -1.219933  | -17.020419 | 0.000000 |
| 559 | 6 | 0 | 0.000000   | -14.873656 | 0.000000 |
| 560 | 1 | 0 | 0.000000   | -18.793364 | 0.000000 |
| 561 | 1 | 0 | 0.000000   | -2.924167  | 0.000000 |
| 562 | 1 | 0 | 0.000000   | -7.931207  | 0.000000 |
| 563 | 1 | 0 | 0.000000   | -13.786564 | 0.000000 |
| 564 | 6 | 0 | -4.010847  | 0.000000   | 0.000000 |
| 565 | 6 | 0 | 4.010847   | 0.000000   | 0.000000 |
| 566 | 6 | 0 | 6.844311   | 0.000000   | 0.000000 |
| 567 | 6 | 0 | 14.873656  | 0.000000   | 0.000000 |
| 568 | 6 | 0 | 17.706589  | 0.000000   | 0.000000 |
| 569 | 1 | 0 | -18.793364 | 0.000000   | 0.000000 |
| 570 | 1 | 0 | -13.786564 | 0.000000   | 0.000000 |
| 571 | 1 | 0 | -7.931207  | 0.000000   | 0.000000 |
| 572 | 1 | 0 | -2.924167  | 0.000000   | 0.000000 |
| 573 | 1 | 0 | 2.924167   | 0.000000   | 0.000000 |
| 574 | 1 | 0 | 7.931207   | 0.000000   | 0.000000 |
| 575 | 1 | 0 | 13.786564  | 0.000000   | 0.000000 |
| 576 | 1 | 0 | 18.793364  | 0.000000   | 0.000000 |

---

**Table S8.** The optimized Cartesian coordinates of the compound **5** calculated at the B3LYP/6–21G(d) level of theory

| Center Number | Atomic Number | Atomic Type | Coordinates (Angstroms) |            |            |
|---------------|---------------|-------------|-------------------------|------------|------------|
|               |               |             | X                       | Y          | Z          |
| 1             | 1             | 0           | -13.641931              | 2.503201   | 0.000000   |
| 2             | 1             | 0           | 11.416333               | -7.876271  | 0.000000   |
| 3             | 1             | 0           | -8.536143               | 10.313417  | 10.531434  |
| 4             | 8             | 0           | -7.563863               | 11.436700  | 8.178446   |
| 5             | 1             | 0           | -2.503201               | -13.641931 | 0.000000   |
| 6             | 6             | 0           | -1.378618               | -13.668494 | -2.490655  |
| 7             | 6             | 0           | -4.162485               | -13.229663 | -6.154693  |
| 8             | 6             | 0           | 1.416552                | 13.645387  | 0.000000   |
| 9             | 8             | 0           | 2.743500                | 13.554673  | -2.677299  |
| 10            | 6             | 0           | -2.921019               | 13.499327  | -6.810028  |
| 11            | 6             | 0           | -1.367981               | 13.533273  | -8.377822  |
| 12            | 6             | 0           | 1.367981                | 13.533273  | -8.377822  |
| 13            | 6             | 0           | 2.933379                | 13.556911  | -4.047519  |
| 14            | 6             | 0           | 1.378618                | 13.668494  | -2.490655  |
| 15            | 6             | 0           | -1.719623               | 13.677532  | -6.139862  |
| 16            | 6             | 0           | -1.723990               | 13.705156  | -4.717845  |
| 17            | 6             | 0           | -0.712329               | 13.757690  | -3.706913  |
| 18            | 6             | 0           | 0.712329                | 13.757690  | -3.706913  |
| 19            | 6             | 0           | 1.723990                | 13.705156  | -4.717845  |
| 20            | 6             | 0           | 1.719623                | 13.677532  | -6.139862  |
| 21            | 6             | 0           | 0.701070                | 13.682462  | -7.147310  |
| 22            | 6             | 0           | -0.701070               | 13.682462  | -7.147310  |
| 23            | 6             | 0           | -2.933379               | 13.556911  | -4.047519  |
| 24            | 6             | 0           | -1.378618               | 13.668494  | -2.490655  |
| 25            | 6             | 0           | -4.171484               | 13.256321  | -4.696560  |
| 26            | 6             | 0           | -4.162485               | 13.229663  | -6.154693  |
| 27            | 6             | 0           | 0.729271                | 13.659328  | -1.218036  |
| 28            | 6             | 0           | -0.729271               | 13.659328  | -1.218036  |
| 29            | 6             | 0           | 0.700589                | 13.435775  | -9.604942  |
| 30            | 6             | 0           | -0.700589               | 13.435775  | -9.604942  |
| 31            | 8             | 0           | -2.738509               | 13.435427  | -8.178446  |
| 32            | 8             | 0           | -2.743500               | 13.554673  | -2.677299  |
| 33            | 1             | 0           | 1.256723                | 13.328652  | -10.531434 |
| 34            | 1             | 0           | -1.256723               | 13.328652  | -10.531434 |
| 35            | 6             | 0           | -1.416552               | 13.645387  | 0.000000   |
| 36            | 8             | 0           | -7.644654               | 11.524549  | -2.677299  |
| 37            | 6             | 0           | -11.610938              | 7.479993   | -6.810028  |
| 38            | 6             | 0           | -10.536778              | 8.602160   | -8.377822  |
| 39            | 6             | 0           | -8.602160               | 10.536778  | -8.377822  |
| 40            | 6             | 0           | -7.479993               | 11.610938  | -6.810028  |
| 41            | 6             | 0           | -7.511971               | 11.660395  | -4.047519  |
| 42            | 6             | 0           | -8.690255               | 10.639915  | -2.490655  |
| 43            | 6             | 0           | -10.887433              | 8.455519   | -6.139862  |
| 44            | 6             | 0           | -10.910054              | 8.471963   | -4.717845  |
| 45            | 6             | 0           | -10.231848              | 9.224464   | -3.706913  |
| 46            | 6             | 0           | -9.224464               | 10.231848  | -3.706913  |
| 47            | 6             | 0           | -8.471963               | 10.910054  | -4.717845  |
| 48            | 6             | 0           | -8.455519               | 10.887433  | -6.139862  |
| 49            | 6             | 0           | -9.179230               | 10.170693  | -7.147310  |
| 50            | 6             | 0           | -10.170693              | 9.179230   | -7.147310  |
| 51            | 6             | 0           | -11.660395              | 7.511971   | -4.047519  |
| 52            | 6             | 0           | -10.639915              | 8.690255   | -2.490655  |
| 53            | 6             | 0           | -12.323319              | 6.423949   | -4.696560  |
| 54            | 6             | 0           | -12.298105              | 6.411463   | -6.154693  |
| 55            | 6             | 0           | -6.423949               | 12.323319  | -4.696560  |
| 56            | 6             | 0           | -6.411463               | 12.298105  | -6.154693  |
| 57            | 6             | 0           | -9.142931               | 10.174276  | -1.218036  |
| 58            | 6             | 0           | -10.174276              | 9.142931   | -1.218036  |
| 59            | 6             | 0           | -9.005136               | 9.995919   | -9.604942  |
| 60            | 6             | 0           | -9.995919               | 9.005136   | -9.604942  |
| 61            | 8             | 0           | -11.436700              | 7.563863   | -8.178446  |
| 62            | 8             | 0           | -11.524549              | 7.644654   | -2.677299  |
| 63            | 8             | 0           | -7.563863               | 11.436700  | -8.178446  |
| 64            | 1             | 0           | -8.536143               | 10.313417  | -10.531434 |
| 65            | 1             | 0           | -10.313417              | 8.536143   | -10.531434 |
| 66            | 6             | 0           | -8.647092               | 10.650399  | 0.000000   |
| 67            | 8             | 0           | 2.738509                | 13.435427  | 8.178446   |
| 68            | 6             | 0           | -2.933379               | 13.556911  | 4.047519   |

|     |   |   |            |           |           |
|-----|---|---|------------|-----------|-----------|
| 69  | 6 | 0 | -1.378618  | 13.668494 | 2.490655  |
| 70  | 6 | 0 | 1.378618   | 13.668494 | 2.490655  |
| 71  | 6 | 0 | 2.933379   | 13.556911 | 4.047519  |
| 72  | 6 | 0 | 2.921019   | 13.499327 | 6.810028  |
| 73  | 6 | 0 | 1.367981   | 13.533273 | 8.377822  |
| 74  | 6 | 0 | -1.723990  | 13.705156 | 4.717845  |
| 75  | 6 | 0 | -1.719623  | 13.677532 | 6.139862  |
| 76  | 6 | 0 | -0.701070  | 13.682462 | 7.147310  |
| 77  | 6 | 0 | 0.701070   | 13.682462 | 7.147310  |
| 78  | 6 | 0 | 1.719623   | 13.677532 | 6.139862  |
| 79  | 6 | 0 | 1.723990   | 13.705156 | 4.717845  |
| 80  | 6 | 0 | 0.712329   | 13.757690 | 3.706913  |
| 81  | 6 | 0 | -0.712329  | 13.757690 | 3.706913  |
| 82  | 6 | 0 | -2.921019  | 13.499327 | 6.810028  |
| 83  | 6 | 0 | -1.367981  | 13.533273 | 8.377822  |
| 84  | 6 | 0 | -4.162485  | 13.229663 | 6.154693  |
| 85  | 6 | 0 | -4.171484  | 13.256321 | 4.696560  |
| 86  | 6 | 0 | 4.162485   | 13.229663 | 6.154693  |
| 87  | 6 | 0 | 4.171484   | 13.256321 | 4.696560  |
| 88  | 6 | 0 | 0.700589   | 13.435775 | 9.604942  |
| 89  | 6 | 0 | -0.700589  | 13.435775 | 9.604942  |
| 90  | 6 | 0 | 0.729271   | 13.659328 | 1.218036  |
| 91  | 6 | 0 | -0.729271  | 13.659328 | 1.218036  |
| 92  | 8 | 0 | -2.743500  | 13.554673 | 2.677299  |
| 93  | 8 | 0 | -2.738509  | 13.435427 | 8.178446  |
| 94  | 8 | 0 | 2.743500   | 13.554673 | 2.677299  |
| 95  | 6 | 0 | 5.296918   | 12.787891 | 6.842300  |
| 96  | 6 | 0 | 5.318249   | 12.839390 | 4.009865  |
| 97  | 1 | 0 | 1.256723   | 13.328652 | 10.531434 |
| 98  | 1 | 0 | -1.256723  | 13.328652 | 10.531434 |
| 99  | 6 | 0 | -5.296918  | 12.787891 | 6.842300  |
| 100 | 6 | 0 | -11.660395 | 7.511971  | 4.047519  |
| 101 | 6 | 0 | -10.639915 | 8.690255  | 2.490655  |
| 102 | 6 | 0 | -8.690255  | 10.639915 | 2.490655  |
| 103 | 6 | 0 | -7.511971  | 11.660395 | 4.047519  |
| 104 | 6 | 0 | -7.479993  | 11.610938 | 6.810028  |
| 105 | 6 | 0 | -10.910054 | 8.471963  | 4.717845  |
| 106 | 6 | 0 | -10.887433 | 8.455519  | 6.139862  |
| 107 | 6 | 0 | -10.170693 | 9.179230  | 7.147310  |
| 108 | 6 | 0 | -9.179230  | 10.170693 | 7.147310  |
| 109 | 6 | 0 | -8.471963  | 10.910054 | 4.717845  |
| 110 | 6 | 0 | -9.224464  | 10.231848 | 3.706913  |
| 111 | 6 | 0 | -10.231848 | 9.224464  | 3.706913  |
| 112 | 6 | 0 | -11.610938 | 7.479993  | 6.810028  |
| 113 | 6 | 0 | -10.536778 | 8.602160  | 8.377822  |
| 114 | 6 | 0 | -12.298105 | 6.411463  | 6.154693  |
| 115 | 6 | 0 | -12.323319 | 6.423949  | 4.696560  |
| 116 | 6 | 0 | -6.411463  | 12.298105 | 6.154693  |
| 117 | 6 | 0 | -6.423949  | 12.323319 | 4.696560  |
| 118 | 6 | 0 | -9.995919  | 9.005136  | 9.604942  |
| 119 | 6 | 0 | -9.142931  | 10.174276 | 1.218036  |
| 120 | 6 | 0 | -10.174276 | 9.142931  | 1.218036  |
| 121 | 8 | 0 | -11.524549 | 7.644654  | 2.677299  |
| 122 | 8 | 0 | -11.436700 | 7.563863  | 8.178446  |
| 123 | 8 | 0 | -7.644654  | 11.524549 | 2.677299  |
| 124 | 1 | 0 | -10.313417 | 8.536143  | 10.531434 |
| 125 | 6 | 0 | -5.318249  | 12.839390 | 4.009865  |
| 126 | 6 | 0 | -10.650399 | 8.647092  | 0.000000  |
| 127 | 6 | 0 | -5.318249  | 12.839390 | -4.009865 |
| 128 | 6 | 0 | -5.296918  | 12.787891 | -6.842300 |
| 129 | 1 | 0 | 2.503201   | 13.641931 | 0.000000  |
| 130 | 1 | 0 | -2.503201  | 13.641931 | 0.000000  |
| 131 | 1 | 0 | -7.876271  | 11.416333 | 0.000000  |
| 132 | 1 | 0 | -5.273614  | 12.731631 | 7.927122  |
| 133 | 1 | 0 | -5.311533  | 12.823174 | 2.923367  |
| 134 | 1 | 0 | -11.416333 | 7.876271  | 0.000000  |
| 135 | 1 | 0 | -5.311533  | 12.823174 | -2.923367 |
| 136 | 1 | 0 | -5.273614  | 12.731631 | -7.927122 |
| 137 | 8 | 0 | -13.554673 | 2.743500  | -2.677299 |
| 138 | 6 | 0 | -13.499327 | -2.921019 | -6.810028 |
| 139 | 6 | 0 | -13.533273 | -1.367981 | -8.377822 |
| 140 | 6 | 0 | -13.533273 | 1.367981  | -8.377822 |
| 141 | 6 | 0 | -13.499327 | 2.921019  | -6.810028 |
| 142 | 6 | 0 | -13.556911 | 2.933379  | -4.047519 |
| 143 | 6 | 0 | -13.668494 | 1.378618  | -2.490655 |
| 144 | 6 | 0 | -13.677532 | -1.719623 | -6.139862 |
| 145 | 6 | 0 | -13.705156 | -1.723990 | -4.717845 |
| 146 | 6 | 0 | -13.757690 | -0.712329 | -3.706913 |
| 147 | 6 | 0 | -13.757690 | 0.712329  | -3.706913 |

|     |   |   |            |            |            |
|-----|---|---|------------|------------|------------|
| 148 | 6 | 0 | -13.705156 | 1.723990   | -4.717845  |
| 149 | 6 | 0 | -13.677532 | 1.719623   | -6.139862  |
| 150 | 6 | 0 | -13.682462 | 0.701070   | -7.147310  |
| 151 | 6 | 0 | -13.682462 | -0.701070  | -7.147310  |
| 152 | 6 | 0 | -13.556911 | -2.933379  | -4.047519  |
| 153 | 6 | 0 | -13.668494 | -1.378618  | -2.490655  |
| 154 | 6 | 0 | -13.256321 | -4.171484  | -4.696560  |
| 155 | 6 | 0 | -13.229663 | -4.162485  | -6.154693  |
| 156 | 6 | 0 | -13.256321 | 4.171484   | -4.696560  |
| 157 | 6 | 0 | -13.229663 | 4.162485   | -6.154693  |
| 158 | 6 | 0 | -13.659328 | 0.729271   | -1.218036  |
| 159 | 6 | 0 | -13.659328 | -0.729271  | -1.218036  |
| 160 | 6 | 0 | -13.435775 | 0.700589   | -9.604942  |
| 161 | 6 | 0 | -13.435775 | -0.700589  | -9.604942  |
| 162 | 8 | 0 | -13.435427 | -2.738509  | -8.178446  |
| 163 | 8 | 0 | -13.554673 | -2.743500  | -2.677299  |
| 164 | 8 | 0 | -13.435427 | 2.738509   | -8.178446  |
| 165 | 6 | 0 | -12.839390 | 5.318249   | -4.009865  |
| 166 | 1 | 0 | -13.328652 | 1.256723   | -10.531434 |
| 167 | 1 | 0 | -13.328652 | -1.256723  | -10.531434 |
| 168 | 6 | 0 | -13.645387 | -1.416552  | 0.000000   |
| 169 | 8 | 0 | -11.524549 | -7.644654  | -2.677299  |
| 170 | 6 | 0 | -7.479993  | -11.610938 | -6.810028  |
| 171 | 6 | 0 | -8.602160  | -10.536778 | -8.377822  |
| 172 | 6 | 0 | -10.536778 | -8.602160  | -8.377822  |
| 173 | 6 | 0 | -11.610938 | -7.479993  | -6.810028  |
| 174 | 6 | 0 | -11.660395 | -7.511971  | -4.047519  |
| 175 | 6 | 0 | -10.639915 | -8.690255  | -2.490655  |
| 176 | 6 | 0 | -8.455519  | -10.887433 | -6.139862  |
| 177 | 6 | 0 | -8.471963  | -10.910054 | -4.717845  |
| 178 | 6 | 0 | -9.224464  | -10.231848 | -3.706913  |
| 179 | 6 | 0 | -10.231848 | -9.224464  | -3.706913  |
| 180 | 6 | 0 | -10.910054 | -8.471963  | -4.717845  |
| 181 | 6 | 0 | -10.887433 | -8.455519  | -6.139862  |
| 182 | 6 | 0 | -10.170693 | -9.179230  | -7.147310  |
| 183 | 6 | 0 | -9.179230  | -10.170693 | -7.147310  |
| 184 | 6 | 0 | -7.511971  | -11.660395 | -4.047519  |
| 185 | 6 | 0 | -8.690255  | -10.639915 | -2.490655  |
| 186 | 6 | 0 | -6.423949  | -12.323319 | -4.696560  |
| 187 | 6 | 0 | -6.411463  | -12.298105 | -6.154693  |
| 188 | 6 | 0 | -12.323319 | -6.423949  | -4.696560  |
| 189 | 6 | 0 | -12.298105 | -6.411463  | -6.154693  |
| 190 | 6 | 0 | -10.174276 | -9.142931  | -1.218036  |
| 191 | 6 | 0 | -9.142931  | -10.174276 | -1.218036  |
| 192 | 6 | 0 | -9.995919  | -9.005136  | -9.604942  |
| 193 | 6 | 0 | -9.005136  | -9.995919  | -9.604942  |
| 194 | 8 | 0 | -7.563863  | -11.436700 | -8.178446  |
| 195 | 8 | 0 | -7.644654  | -11.524549 | -2.677299  |
| 196 | 8 | 0 | -11.436700 | -7.563863  | -8.178446  |
| 197 | 1 | 0 | -10.313417 | -8.536143  | -10.531434 |
| 198 | 1 | 0 | -8.536143  | -10.313417 | -10.531434 |
| 199 | 6 | 0 | -10.650399 | -8.647092  | 0.000000   |
| 200 | 8 | 0 | -13.435427 | 2.738509   | 8.178446   |
| 201 | 6 | 0 | -13.556911 | -2.933379  | 4.047519   |
| 202 | 6 | 0 | -13.668494 | -1.378618  | 2.490655   |
| 203 | 6 | 0 | -13.668494 | 1.378618   | 2.490655   |
| 204 | 6 | 0 | -13.556911 | 2.933379   | 4.047519   |
| 205 | 6 | 0 | -13.499327 | 2.921019   | 6.810028   |
| 206 | 6 | 0 | -13.533273 | 1.367981   | 8.377822   |
| 207 | 6 | 0 | -13.705156 | -1.723990  | 4.717845   |
| 208 | 6 | 0 | -13.677532 | -1.719623  | 6.139862   |
| 209 | 6 | 0 | -13.682462 | -0.701070  | 7.147310   |
| 210 | 6 | 0 | -13.682462 | 0.701070   | 7.147310   |
| 211 | 6 | 0 | -13.677532 | 1.719623   | 6.139862   |
| 212 | 6 | 0 | -13.705156 | 1.723990   | 4.717845   |
| 213 | 6 | 0 | -13.757690 | 0.712329   | 3.706913   |
| 214 | 6 | 0 | -13.757690 | -0.712329  | 3.706913   |
| 215 | 6 | 0 | -13.499327 | -2.921019  | 6.810028   |
| 216 | 6 | 0 | -13.533273 | -1.367981  | 8.377822   |
| 217 | 6 | 0 | -13.229663 | -4.162485  | 6.154693   |
| 218 | 6 | 0 | -13.256321 | -4.171484  | 4.696560   |
| 219 | 6 | 0 | -13.229663 | 4.162485   | 6.154693   |
| 220 | 6 | 0 | -13.256321 | 4.171484   | 4.696560   |
| 221 | 6 | 0 | -13.435775 | 0.700589   | 9.604942   |
| 222 | 6 | 0 | -13.435775 | -0.700589  | 9.604942   |
| 223 | 6 | 0 | -13.659328 | 0.729271   | 1.218036   |
| 224 | 6 | 0 | -13.659328 | -0.729271  | 1.218036   |
| 225 | 8 | 0 | -13.554673 | -2.743500  | 2.677299   |
| 226 | 8 | 0 | -13.435427 | -2.738509  | 8.178446   |

|     |   |   |            |            |           |
|-----|---|---|------------|------------|-----------|
| 227 | 8 | 0 | -13.554673 | 2.743500   | 2.677299  |
| 228 | 1 | 0 | -13.328652 | 1.256723   | 10.531434 |
| 229 | 1 | 0 | -13.328652 | -1.256723  | 10.531434 |
| 230 | 6 | 0 | -12.787891 | -5.296918  | 6.842300  |
| 231 | 8 | 0 | -11.436700 | -7.563863  | 8.178446  |
| 232 | 6 | 0 | -7.511971  | -11.660395 | 4.047519  |
| 233 | 6 | 0 | -8.690255  | -10.639915 | 2.490655  |
| 234 | 6 | 0 | -10.639915 | -8.690255  | 2.490655  |
| 235 | 6 | 0 | -11.660395 | -7.511971  | 4.047519  |
| 236 | 6 | 0 | -11.610938 | -7.479993  | 6.810028  |
| 237 | 6 | 0 | -10.536778 | -8.602160  | 8.377822  |
| 238 | 6 | 0 | -8.471963  | -10.910054 | 4.717845  |
| 239 | 6 | 0 | -8.455519  | -10.887433 | 6.139862  |
| 240 | 6 | 0 | -9.179230  | -10.170693 | 7.147310  |
| 241 | 6 | 0 | -10.170693 | -9.179230  | 7.147310  |
| 242 | 6 | 0 | -10.887433 | -8.455519  | 6.139862  |
| 243 | 6 | 0 | -10.910054 | -8.471963  | 4.717845  |
| 244 | 6 | 0 | -10.231848 | -9.224464  | 3.706913  |
| 245 | 6 | 0 | -9.224464  | -10.231848 | 3.706913  |
| 246 | 6 | 0 | -7.479993  | -11.610938 | 6.810028  |
| 247 | 6 | 0 | -8.602160  | -10.536778 | 8.377822  |
| 248 | 6 | 0 | -12.298105 | -6.411463  | 6.154693  |
| 249 | 6 | 0 | -12.323319 | -6.423949  | 4.696560  |
| 250 | 6 | 0 | -9.995919  | -9.005136  | 9.604942  |
| 251 | 6 | 0 | -9.005136  | -9.995919  | 9.604942  |
| 252 | 6 | 0 | -10.174276 | -9.142931  | 1.218036  |
| 253 | 6 | 0 | -9.142931  | -10.174276 | 1.218036  |
| 254 | 8 | 0 | -7.644654  | -11.524549 | 2.677299  |
| 255 | 8 | 0 | -7.563863  | -11.436700 | 8.178446  |
| 256 | 8 | 0 | -11.524549 | -7.644654  | 2.677299  |
| 257 | 1 | 0 | -10.313417 | -8.536143  | 10.531434 |
| 258 | 1 | 0 | -8.536143  | -10.313417 | 10.531434 |
| 259 | 6 | 0 | -12.839390 | -5.318249  | 4.009865  |
| 260 | 6 | 0 | -8.647092  | -10.650399 | 0.000000  |
| 261 | 6 | 0 | -12.839390 | -5.318249  | -4.009865 |
| 262 | 6 | 0 | -12.787891 | -5.296918  | -6.842300 |
| 263 | 1 | 0 | -13.641931 | -2.503201  | 0.000000  |
| 264 | 1 | 0 | -11.416333 | -7.876271  | 0.000000  |
| 265 | 1 | 0 | -12.731631 | -5.273614  | 7.927122  |
| 266 | 1 | 0 | -12.823174 | -5.311533  | 2.923367  |
| 267 | 1 | 0 | -7.876271  | -11.416333 | 0.000000  |
| 268 | 1 | 0 | -12.823174 | -5.311533  | -2.923367 |
| 269 | 1 | 0 | -12.731631 | -5.273614  | -7.927122 |
| 270 | 6 | 0 | -12.787891 | 5.296918   | -6.842300 |
| 271 | 6 | 0 | -12.787891 | 5.296918   | 6.842300  |
| 272 | 6 | 0 | -12.839390 | 5.318249   | 4.009865  |
| 273 | 1 | 0 | -12.823174 | 5.311533   | -2.923367 |
| 274 | 1 | 0 | -12.731631 | 5.273614   | -7.927122 |
| 275 | 1 | 0 | -12.731631 | 5.273614   | 7.927122  |
| 276 | 1 | 0 | -12.823174 | 5.311533   | 2.923367  |
| 277 | 6 | 0 | -6.423949  | -12.323319 | 4.696560  |
| 278 | 6 | 0 | -6.411463  | -12.298105 | 6.154693  |
| 279 | 6 | 0 | -5.296918  | -12.787891 | 6.842300  |
| 280 | 6 | 0 | 8.647092   | 10.650399  | 0.000000  |
| 281 | 8 | 0 | 7.644654   | 11.524549  | 2.677299  |
| 282 | 6 | 0 | 11.610938  | 7.479993   | 6.810028  |
| 283 | 6 | 0 | 10.536778  | 8.602160   | 8.377822  |
| 284 | 6 | 0 | 8.602160   | 10.536778  | 8.377822  |
| 285 | 6 | 0 | 7.479993   | 11.610938  | 6.810028  |
| 286 | 6 | 0 | 7.511971   | 11.660395  | 4.047519  |
| 287 | 6 | 0 | 8.690255   | 10.639915  | 2.490655  |
| 288 | 6 | 0 | 10.887433  | 8.455519   | 6.139862  |
| 289 | 6 | 0 | 10.910054  | 8.471963   | 4.717845  |
| 290 | 6 | 0 | 10.231848  | 9.224464   | 3.706913  |
| 291 | 6 | 0 | 9.224464   | 10.231848  | 3.706913  |
| 292 | 6 | 0 | 8.471963   | 10.910054  | 4.717845  |
| 293 | 6 | 0 | 8.455519   | 10.887433  | 6.139862  |
| 294 | 6 | 0 | 9.179230   | 10.170693  | 7.147310  |
| 295 | 6 | 0 | 10.170693  | 9.179230   | 7.147310  |
| 296 | 6 | 0 | 11.660395  | 7.511971   | 4.047519  |
| 297 | 6 | 0 | 10.639915  | 8.690255   | 2.490655  |
| 298 | 6 | 0 | 12.323319  | 6.423949   | 4.696560  |
| 299 | 6 | 0 | 12.298105  | 6.411463   | 6.154693  |
| 300 | 6 | 0 | 6.423949   | 12.323319  | 4.696560  |
| 301 | 6 | 0 | 6.411463   | 12.298105  | 6.154693  |
| 302 | 6 | 0 | 9.142931   | 10.174276  | 1.218036  |
| 303 | 6 | 0 | 10.174276  | 9.142931   | 1.218036  |
| 304 | 6 | 0 | 9.005136   | 9.995919   | 9.604942  |
| 305 | 6 | 0 | 9.995919   | 9.005136   | 9.604942  |

|     |   |   |           |           |            |
|-----|---|---|-----------|-----------|------------|
| 306 | 8 | 0 | 11.436700 | 7.563863  | 8.178446   |
| 307 | 8 | 0 | 11.524549 | 7.644654  | 2.677299   |
| 308 | 8 | 0 | 7.563863  | 11.436700 | 8.178446   |
| 309 | 1 | 0 | 8.536143  | 10.313417 | 10.531434  |
| 310 | 1 | 0 | 10.313417 | 8.536143  | 10.531434  |
| 311 | 6 | 0 | 10.650399 | 8.647092  | 0.000000   |
| 312 | 8 | 0 | 13.554673 | 2.743500  | 2.677299   |
| 313 | 6 | 0 | 13.499327 | -2.921019 | 6.810028   |
| 314 | 6 | 0 | 13.533273 | -1.367981 | 8.377822   |
| 315 | 6 | 0 | 13.533273 | 1.367981  | 8.377822   |
| 316 | 6 | 0 | 13.499327 | 2.921019  | 6.810028   |
| 317 | 6 | 0 | 13.556911 | 2.933379  | 4.047519   |
| 318 | 6 | 0 | 13.668494 | 1.378618  | 2.490655   |
| 319 | 6 | 0 | 13.677532 | -1.719623 | 6.139862   |
| 320 | 6 | 0 | 13.705156 | -1.723990 | 4.717845   |
| 321 | 6 | 0 | 13.757690 | -0.712329 | 3.706913   |
| 322 | 6 | 0 | 13.757690 | 0.712329  | 3.706913   |
| 323 | 6 | 0 | 13.705156 | 1.723990  | 4.717845   |
| 324 | 6 | 0 | 13.677532 | 1.719623  | 6.139862   |
| 325 | 6 | 0 | 13.682462 | 0.701070  | 7.147310   |
| 326 | 6 | 0 | 13.682462 | -0.701070 | 7.147310   |
| 327 | 6 | 0 | 13.556911 | -2.933379 | 4.047519   |
| 328 | 6 | 0 | 13.668494 | -1.378618 | 2.490655   |
| 329 | 6 | 0 | 13.256321 | -4.171484 | 4.696560   |
| 330 | 6 | 0 | 13.229663 | -4.162485 | 6.154693   |
| 331 | 6 | 0 | 13.256321 | 4.171484  | 4.696560   |
| 332 | 6 | 0 | 13.229663 | 4.162485  | 6.154693   |
| 333 | 6 | 0 | 13.659328 | 0.729271  | 1.218036   |
| 334 | 6 | 0 | 13.659328 | -0.729271 | 1.218036   |
| 335 | 6 | 0 | 13.435775 | 0.700589  | 9.604942   |
| 336 | 6 | 0 | 13.435775 | -0.700589 | 9.604942   |
| 337 | 8 | 0 | 13.435427 | -2.738509 | 8.178446   |
| 338 | 8 | 0 | 13.554673 | -2.743500 | 2.677299   |
| 339 | 8 | 0 | 13.435427 | 2.738509  | 8.178446   |
| 340 | 1 | 0 | 13.328652 | 1.256723  | 10.531434  |
| 341 | 1 | 0 | 13.328652 | -1.256723 | 10.531434  |
| 342 | 6 | 0 | 13.645387 | 1.416552  | 0.000000   |
| 343 | 8 | 0 | 7.563863  | 11.436700 | -8.178446  |
| 344 | 6 | 0 | 11.660395 | 7.511971  | -4.047519  |
| 345 | 6 | 0 | 10.639915 | 8.690255  | -2.490655  |
| 346 | 6 | 0 | 8.690255  | 10.639915 | -2.490655  |
| 347 | 6 | 0 | 7.511971  | 11.660395 | -4.047519  |
| 348 | 6 | 0 | 7.479993  | 11.610938 | -6.810028  |
| 349 | 6 | 0 | 8.602160  | 10.536778 | -8.377822  |
| 350 | 6 | 0 | 10.910054 | 8.471963  | -4.717845  |
| 351 | 6 | 0 | 10.887433 | 8.455519  | -6.139862  |
| 352 | 6 | 0 | 10.170693 | 9.179230  | -7.147310  |
| 353 | 6 | 0 | 9.179230  | 10.170693 | -7.147310  |
| 354 | 6 | 0 | 8.455519  | 10.887433 | -6.139862  |
| 355 | 6 | 0 | 8.471963  | 10.910054 | -4.717845  |
| 356 | 6 | 0 | 9.224464  | 10.231848 | -3.706913  |
| 357 | 6 | 0 | 10.231848 | 9.224464  | -3.706913  |
| 358 | 6 | 0 | 11.610938 | 7.479993  | -6.810028  |
| 359 | 6 | 0 | 10.536778 | 8.602160  | -8.377822  |
| 360 | 6 | 0 | 12.298105 | 6.411463  | -6.154693  |
| 361 | 6 | 0 | 12.323319 | 6.423949  | -4.696560  |
| 362 | 6 | 0 | 6.411463  | 12.298105 | -6.154693  |
| 363 | 6 | 0 | 6.423949  | 12.323319 | -4.696560  |
| 364 | 6 | 0 | 9.005136  | 9.995919  | -9.604942  |
| 365 | 6 | 0 | 9.995919  | 9.005136  | -9.604942  |
| 366 | 6 | 0 | 9.142931  | 10.174276 | -1.218036  |
| 367 | 6 | 0 | 10.174276 | 9.142931  | -1.218036  |
| 368 | 8 | 0 | 11.524549 | 7.644654  | -2.677299  |
| 369 | 8 | 0 | 11.436700 | 7.563863  | -8.178446  |
| 370 | 8 | 0 | 7.644654  | 11.524549 | -2.677299  |
| 371 | 6 | 0 | 5.318249  | 12.839390 | -4.009865  |
| 372 | 1 | 0 | 8.536143  | 10.313417 | -10.531434 |
| 373 | 1 | 0 | 10.313417 | 8.536143  | -10.531434 |
| 374 | 6 | 0 | 12.787891 | 5.296918  | -6.842300  |
| 375 | 8 | 0 | 13.435427 | 2.738509  | -8.178446  |
| 376 | 6 | 0 | 13.556911 | -2.933379 | -4.047519  |
| 377 | 6 | 0 | 13.668494 | -1.378618 | -2.490655  |
| 378 | 6 | 0 | 13.668494 | 1.378618  | -2.490655  |
| 379 | 6 | 0 | 13.556911 | 2.933379  | -4.047519  |
| 380 | 6 | 0 | 13.499327 | 2.921019  | -6.810028  |
| 381 | 6 | 0 | 13.533273 | 1.367981  | -8.377822  |
| 382 | 6 | 0 | 13.705156 | -1.723990 | -4.717845  |
| 383 | 6 | 0 | 13.677532 | -1.719623 | -6.139862  |
| 384 | 6 | 0 | 13.682462 | -0.701070 | -7.147310  |

|     |   |   |           |            |            |
|-----|---|---|-----------|------------|------------|
| 385 | 6 | 0 | 13.682462 | 0.701070   | -7.147310  |
| 386 | 6 | 0 | 13.677532 | 1.719623   | -6.139862  |
| 387 | 6 | 0 | 13.705156 | 1.723990   | -4.717845  |
| 388 | 6 | 0 | 13.757690 | 0.712329   | -3.706913  |
| 389 | 6 | 0 | 13.757690 | -0.712329  | -3.706913  |
| 390 | 6 | 0 | 13.499327 | -2.921019  | -6.810028  |
| 391 | 6 | 0 | 13.533273 | -1.367981  | -8.377822  |
| 392 | 6 | 0 | 13.229663 | -4.162485  | -6.154693  |
| 393 | 6 | 0 | 13.256321 | -4.171484  | -4.696560  |
| 394 | 6 | 0 | 13.229663 | 4.162485   | -6.154693  |
| 395 | 6 | 0 | 13.256321 | 4.171484   | -4.696560  |
| 396 | 6 | 0 | 13.435775 | 0.700589   | -9.604942  |
| 397 | 6 | 0 | 13.435775 | -0.700589  | -9.604942  |
| 398 | 6 | 0 | 13.659328 | 0.729271   | -1.218036  |
| 399 | 6 | 0 | 13.659328 | -0.729271  | -1.218036  |
| 400 | 8 | 0 | 13.554673 | -2.743500  | -2.677299  |
| 401 | 8 | 0 | 13.435427 | -2.738509  | -8.178446  |
| 402 | 8 | 0 | 13.554673 | 2.743500   | -2.677299  |
| 403 | 1 | 0 | 13.328652 | 1.256723   | -10.531434 |
| 404 | 1 | 0 | 13.328652 | -1.256723  | -10.531434 |
| 405 | 6 | 0 | 12.839390 | 5.318249   | -4.009865  |
| 406 | 6 | 0 | 13.645387 | -1.416552  | 0.000000   |
| 407 | 6 | 0 | 12.839390 | 5.318249   | 4.009865   |
| 408 | 6 | 0 | 12.787891 | 5.296918   | 6.842300   |
| 409 | 1 | 0 | 7.876271  | 11.416333  | 0.000000   |
| 410 | 1 | 0 | 11.416333 | 7.876271   | 0.000000   |
| 411 | 1 | 0 | 13.641931 | 2.503201   | 0.000000   |
| 412 | 1 | 0 | 12.731631 | 5.273614   | -7.927122  |
| 413 | 1 | 0 | 12.823174 | 5.311533   | -2.923367  |
| 414 | 1 | 0 | 13.641931 | -2.503201  | 0.000000   |
| 415 | 1 | 0 | 12.823174 | 5.311533   | 2.923367   |
| 416 | 1 | 0 | 12.731631 | 5.273614   | 7.927122   |
| 417 | 6 | 0 | 10.650399 | -8.647092  | 0.000000   |
| 418 | 8 | 0 | 11.524549 | -7.644654  | 2.677299   |
| 419 | 6 | 0 | 7.479993  | -11.610938 | 6.810028   |
| 420 | 6 | 0 | 8.602160  | -10.536778 | 8.377822   |
| 421 | 6 | 0 | 10.536778 | -8.602160  | 8.377822   |
| 422 | 6 | 0 | 11.610938 | -7.479993  | 6.810028   |
| 423 | 6 | 0 | 11.660395 | -7.511971  | 4.047519   |
| 424 | 6 | 0 | 10.639915 | -8.690255  | 2.490655   |
| 425 | 6 | 0 | 8.455519  | -10.887433 | 6.139862   |
| 426 | 6 | 0 | 8.471963  | -10.910054 | 4.717845   |
| 427 | 6 | 0 | 9.224464  | -10.231848 | 3.706913   |
| 428 | 6 | 0 | 10.231848 | -9.224464  | 3.706913   |
| 429 | 6 | 0 | 10.910054 | -8.471963  | 4.717845   |
| 430 | 6 | 0 | 10.887433 | -8.455519  | 6.139862   |
| 431 | 6 | 0 | 10.170693 | -9.179230  | 7.147310   |
| 432 | 6 | 0 | 9.179230  | -10.170693 | 7.147310   |
| 433 | 6 | 0 | 7.511971  | -11.660395 | 4.047519   |
| 434 | 6 | 0 | 8.690255  | -10.639915 | 2.490655   |
| 435 | 6 | 0 | 6.423949  | -12.323319 | 4.696560   |
| 436 | 6 | 0 | 6.411463  | -12.298105 | 6.154693   |
| 437 | 6 | 0 | 12.323319 | -6.423949  | 4.696560   |
| 438 | 6 | 0 | 12.298105 | -6.411463  | 6.154693   |
| 439 | 6 | 0 | 10.174276 | -9.142931  | 1.218036   |
| 440 | 6 | 0 | 9.142931  | -10.174276 | 1.218036   |
| 441 | 6 | 0 | 9.995919  | -9.005136  | 9.604942   |
| 442 | 6 | 0 | 9.005136  | -9.995919  | 9.604942   |
| 443 | 8 | 0 | 7.563863  | -11.436700 | 8.178446   |
| 444 | 8 | 0 | 7.644654  | -11.524549 | 2.677299   |
| 445 | 8 | 0 | 11.436700 | -7.563863  | 8.178446   |
| 446 | 6 | 0 | 12.839390 | -5.318249  | 4.009865   |
| 447 | 1 | 0 | 10.313417 | -8.536143  | 10.531434  |
| 448 | 1 | 0 | 8.536143  | -10.313417 | 10.531434  |
| 449 | 6 | 0 | 8.647092  | -10.650399 | 0.000000   |
| 450 | 8 | 0 | 2.743500  | -13.554673 | 2.677299   |
| 451 | 6 | 0 | -2.921019 | -13.499327 | 6.810028   |
| 452 | 6 | 0 | -1.367981 | -13.533273 | 8.377822   |
| 453 | 6 | 0 | 1.367981  | -13.533273 | 8.377822   |
| 454 | 6 | 0 | 2.921019  | -13.499327 | 6.810028   |
| 455 | 6 | 0 | 2.933379  | -13.556911 | 4.047519   |
| 456 | 6 | 0 | 1.378618  | -13.668494 | 2.490655   |
| 457 | 6 | 0 | -1.719623 | -13.677532 | 6.139862   |
| 458 | 6 | 0 | -1.723990 | -13.705156 | 4.717845   |
| 459 | 6 | 0 | -0.712329 | -13.757690 | 3.706913   |
| 460 | 6 | 0 | 0.712329  | -13.757690 | 3.706913   |
| 461 | 6 | 0 | 1.723990  | -13.705156 | 4.717845   |
| 462 | 6 | 0 | 1.719623  | -13.677532 | 6.139862   |
| 463 | 6 | 0 | 0.701070  | -13.682462 | 7.147310   |

|     |   |   |           |            |            |
|-----|---|---|-----------|------------|------------|
| 464 | 6 | 0 | -0.701070 | -13.682462 | 7.147310   |
| 465 | 6 | 0 | -2.933379 | -13.556911 | 4.047519   |
| 466 | 6 | 0 | -1.378618 | -13.668494 | 2.490655   |
| 467 | 6 | 0 | -4.171484 | -13.256321 | 4.696560   |
| 468 | 6 | 0 | -4.162485 | -13.229663 | 6.154693   |
| 469 | 6 | 0 | 4.171484  | -13.256321 | 4.696560   |
| 470 | 6 | 0 | 4.162485  | -13.229663 | 6.154693   |
| 471 | 6 | 0 | -0.729271 | -13.659328 | 1.218036   |
| 472 | 6 | 0 | 0.700589  | -13.435775 | 9.604942   |
| 473 | 6 | 0 | -0.700589 | -13.435775 | 9.604942   |
| 474 | 8 | 0 | -2.738509 | -13.435427 | 8.178446   |
| 475 | 8 | 0 | -2.743500 | -13.554673 | 2.677299   |
| 476 | 8 | 0 | 2.738509  | -13.435427 | 8.178446   |
| 477 | 1 | 0 | 1.256723  | -13.328652 | 10.531434  |
| 478 | 1 | 0 | -1.256723 | -13.328652 | 10.531434  |
| 479 | 8 | 0 | 11.436700 | -7.563863  | -8.178446  |
| 480 | 6 | 0 | 7.511971  | -11.660395 | -4.047519  |
| 481 | 6 | 0 | 8.690255  | -10.639915 | -2.490655  |
| 482 | 6 | 0 | 10.639915 | -8.690255  | -2.490655  |
| 483 | 6 | 0 | 11.660395 | -7.511971  | -4.047519  |
| 484 | 6 | 0 | 11.610938 | -7.479993  | -6.810028  |
| 485 | 6 | 0 | 10.536778 | -8.602160  | -8.377822  |
| 486 | 6 | 0 | 8.471963  | -10.910054 | -4.717845  |
| 487 | 6 | 0 | 8.455519  | -10.887433 | -6.139862  |
| 488 | 6 | 0 | 9.179230  | -10.170693 | -7.147310  |
| 489 | 6 | 0 | 10.170693 | -9.179230  | -7.147310  |
| 490 | 6 | 0 | 10.887433 | -8.455519  | -6.139862  |
| 491 | 6 | 0 | 10.910054 | -8.471963  | -4.717845  |
| 492 | 6 | 0 | 10.231848 | -9.224464  | -3.706913  |
| 493 | 6 | 0 | 9.224464  | -10.231848 | -3.706913  |
| 494 | 6 | 0 | 7.479993  | -11.610938 | -6.810028  |
| 495 | 6 | 0 | 8.602160  | -10.536778 | -8.377822  |
| 496 | 6 | 0 | 6.411463  | -12.298105 | -6.154693  |
| 497 | 6 | 0 | 6.423949  | -12.323319 | -4.696560  |
| 498 | 6 | 0 | 12.298105 | -6.411463  | -6.154693  |
| 499 | 6 | 0 | 12.323319 | -6.423949  | -4.696560  |
| 500 | 6 | 0 | 9.995919  | -9.005136  | -9.604942  |
| 501 | 6 | 0 | 9.005136  | -9.995919  | -9.604942  |
| 502 | 6 | 0 | 10.174276 | -9.142931  | -1.218036  |
| 503 | 6 | 0 | 9.142931  | -10.174276 | -1.218036  |
| 504 | 8 | 0 | 7.644654  | -11.524549 | -2.677299  |
| 505 | 8 | 0 | 7.563863  | -11.436700 | -8.178446  |
| 506 | 8 | 0 | 11.524549 | -7.644654  | -2.677299  |
| 507 | 1 | 0 | 10.313417 | -8.536143  | -10.531434 |
| 508 | 1 | 0 | 8.536143  | -10.313417 | -10.531434 |
| 509 | 6 | 0 | 5.296918  | -12.787891 | -6.842300  |
| 510 | 8 | 0 | 2.738509  | -13.435427 | -8.178446  |
| 511 | 6 | 0 | 1.378618  | -13.668494 | -2.490655  |
| 512 | 6 | 0 | 2.933379  | -13.556911 | -4.047519  |
| 513 | 6 | 0 | 2.921019  | -13.499327 | -6.810028  |
| 514 | 6 | 0 | 1.367981  | -13.533273 | -8.377822  |
| 515 | 6 | 0 | -1.723990 | -13.705156 | -4.717845  |
| 516 | 6 | 0 | -1.719623 | -13.677532 | -6.139862  |
| 517 | 6 | 0 | -0.701070 | -13.682462 | -7.147310  |
| 518 | 6 | 0 | 0.701070  | -13.682462 | -7.147310  |
| 519 | 6 | 0 | 1.719623  | -13.677532 | -6.139862  |
| 520 | 6 | 0 | 1.723990  | -13.705156 | -4.717845  |
| 521 | 6 | 0 | 0.712329  | -13.757690 | -3.706913  |
| 522 | 6 | 0 | -0.712329 | -13.757690 | -3.706913  |
| 523 | 6 | 0 | -2.921019 | -13.499327 | -6.810028  |
| 524 | 6 | 0 | -1.367981 | -13.533273 | -8.377822  |
| 525 | 6 | 0 | 4.162485  | -13.229663 | -6.154693  |
| 526 | 6 | 0 | 4.171484  | -13.256321 | -4.696560  |
| 527 | 6 | 0 | 0.700589  | -13.435775 | -9.604942  |
| 528 | 6 | 0 | -0.700589 | -13.435775 | -9.604942  |
| 529 | 6 | 0 | 0.729271  | -13.659328 | -1.218036  |
| 530 | 8 | 0 | -2.743500 | -13.554673 | -2.677299  |
| 531 | 8 | 0 | -2.738509 | -13.435427 | -8.178446  |
| 532 | 8 | 0 | 2.743500  | -13.554673 | -2.677299  |
| 533 | 1 | 0 | 1.256723  | -13.328652 | -10.531434 |
| 534 | 1 | 0 | -1.256723 | -13.328652 | -10.531434 |
| 535 | 6 | 0 | 5.318249  | -12.839390 | -4.009865  |
| 536 | 6 | 0 | 5.318249  | -12.839390 | 4.009865   |
| 537 | 6 | 0 | 5.296918  | -12.787891 | 6.842300   |
| 538 | 1 | 0 | 7.876271  | -11.416333 | 0.000000   |
| 539 | 1 | 0 | 5.273614  | -12.731631 | -7.927122  |
| 540 | 1 | 0 | 5.311533  | -12.823174 | -2.923367  |
| 541 | 1 | 0 | 5.311533  | -12.823174 | 2.923367   |
| 542 | 1 | 0 | 5.273614  | -12.731631 | 7.927122   |



|     |   |   |            |            |           |
|-----|---|---|------------|------------|-----------|
| 543 | 6 | 0 | 12.787891  | -5.296918  | 6.842300  |
| 544 | 6 | 0 | 12.787891  | -5.296918  | -6.842300 |
| 545 | 6 | 0 | 12.839390  | -5.318249  | -4.009865 |
| 546 | 1 | 0 | 12.823174  | -5.311533  | 2.923367  |
| 547 | 1 | 0 | 12.731631  | -5.273614  | 7.927122  |
| 548 | 1 | 0 | 12.731631  | -5.273614  | -7.927122 |
| 549 | 1 | 0 | 12.823174  | -5.311533  | -2.923367 |
| 550 | 6 | 0 | -5.318249  | -12.839390 | 4.009865  |
| 551 | 6 | 0 | -5.296918  | -12.787891 | -6.842300 |
| 552 | 6 | 0 | -4.171484  | -13.256321 | -4.696560 |
| 553 | 6 | 0 | -2.933379  | -13.556911 | -4.047519 |
| 554 | 6 | 0 | -5.318249  | -12.839390 | -4.009865 |
| 555 | 6 | 0 | 2.921019   | 13.499327  | -6.810028 |
| 556 | 8 | 0 | 2.738509   | 13.435427  | -8.178446 |
| 557 | 6 | 0 | 4.162485   | 13.229663  | -6.154693 |
| 558 | 6 | 0 | 4.171484   | 13.256321  | -4.696560 |
| 559 | 6 | 0 | 5.296918   | 12.787891  | -6.842300 |
| 560 | 1 | 0 | 5.273614   | 12.731631  | 7.927122  |
| 561 | 1 | 0 | 5.311533   | 12.823174  | 2.923367  |
| 562 | 1 | 0 | -5.273614  | -12.731631 | 7.927122  |
| 563 | 1 | 0 | 5.311533   | 12.823174  | -2.923367 |
| 564 | 1 | 0 | -5.311533  | -12.823174 | 2.923367  |
| 565 | 1 | 0 | -5.273614  | -12.731631 | -7.927122 |
| 566 | 1 | 0 | -5.311533  | -12.823174 | -2.923367 |
| 567 | 1 | 0 | 5.273614   | 12.731631  | -7.927122 |
| 568 | 6 | 0 | 0.729271   | -13.659328 | 1.218036  |
| 569 | 6 | 0 | 1.416552   | -13.645387 | 0.000000  |
| 570 | 6 | 0 | -1.416552  | -13.645387 | 0.000000  |
| 571 | 6 | 0 | -0.729271  | -13.659328 | -1.218036 |
| 572 | 1 | 0 | 2.503201   | -13.641931 | 0.000000  |
| 573 | 6 | 0 | -8.455519  | 10.887433  | 6.139862  |
| 574 | 6 | 0 | -8.602160  | 10.536778  | 8.377822  |
| 575 | 6 | 0 | -9.005136  | 9.995919   | 9.604942  |
| 576 | 6 | 0 | -13.645387 | 1.416552   | 0.000000  |

---
